# Supplementary material
Source: PubMed Central journal article supplement (PMC9116463)
Supplement: NIHMS1518386-supplement-1.pdf [file NIHMS1518386-supplement-1.pdf]

**Supplementary Table S-1.** Up- and down-regulated proteins in CEA10, ISSFT-021 and IF1SW-F4 when normalized to Af293.

| Gene         | Protein names                                                                            | Differentially expressed proteins in CEA10 |           |          | P-value  |
|--------------|------------------------------------------------------------------------------------------|--------------------------------------------|-----------|----------|----------|
|              |                                                                                          | Relative protein abundance*                |           |          |          |
|              |                                                                                          | CEA10                                      | ISSFT-021 | IF1SW-F4 |          |
| AFUA_1G15010 | AMP binding domain protein, putative                                                     | -4.47                                      | -3.65     | -3.15    | 2.42E-03 |
| AFUA_1G13530 | Uncharacterized protein                                                                  | -4.30                                      | -3.82     | -2.75    | 3.15E-04 |
| AFUA_1G10550 | CBF/NF-Y family transcription factor, putative                                           | -4.29                                      | -5.75     | -3.37    | 3.43E-06 |
| AFUA_2G03390 | Histone deacetylase (EC 3.5.1.98)                                                        | -4.27                                      | -5.76     | -3.78    | 1.15E-03 |
| AFUA_1G01812 | MFS transporter, putative                                                                | -4.17                                      | -2.93     | -2.20    | 4.25E-03 |
| AFUA_6G02830 | Uncharacterized protein                                                                  | -4.08                                      | -2.59     | -1.87    | 6.97E-04 |
| AFUA_6G12450 | Chaperone/heat shock protein Hsp12, putative                                             | -4.05                                      | -5.81     | -5.12    | 5.46E-05 |
| AFUA_1G03710 | C2H2 finger domain protein, putative                                                     | -4.02                                      | -4.17     | -3.69    | 7.80E-03 |
| AFUA_1G11640 | Cytosolic Cu/Zn superoxide dismutase, putative                                           | -3.95                                      | -2.30     | -3.07    | 3.00E-06 |
| AFUA_1G12070 | Glycine cleavage system H protein                                                        | -3.95                                      | -4.38     | -4.79    | 8.05E-05 |
| AFUA_1G06100 | Glutaredoxin Grx1, putative                                                              | -3.93                                      | -1.25     | -0.60    | 2.72E-08 |
| AFUA_7G05270 | COMPASS complex subunit Sdc1, putative                                                   | -3.87                                      | -3.18     | -2.60    | 3.89E-03 |
| AFUA_6G12000 | Uncharacterized protein                                                                  | -3.87                                      | -5.08     | -3.22    | 6.46E-06 |
| AFUA_6G08990 | Uncharacterized protein                                                                  | -3.86                                      | -1.45     | -1.56    | 3.84E-04 |
| AFUA_6G04390 | E3 ubiquitin-protein ligase bre1 (EC 2.3.2.27) (RING-type E3 ubiquitin transferase bre1) | -3.76                                      | -4.23     | -4.24    | 8.60E-05 |
| AFUA_5G12180 | Ran-specific GTPase-activating protein 1, putative                                       | -3.75                                      | -3.12     | -3.01    | 9.69E-08 |
| AFUA_3G14540 | Heat shock protein Hsp30/Hsp42, putative                                                 | -3.73                                      | -4.52     | -4.20    | 3.63E-08 |
| AFUA_4G10020 | Clathrin light chain                                                                     | -3.70                                      | -3.30     | -2.33    | 1.95E-06 |
| AFUA_4G08960 | GPI anchored cell wall protein, putative                                                 | -3.69                                      | -5.18     | -5.37    | 8.40E-05 |
| AFUA_6G13670 | Reticulon-like protein                                                                   | -3.69                                      | -5.29     | -2.62    | 3.96E-08 |
| AFUA_2G10020 | Uncharacterized protein                                                                  | -3.67                                      | -5.69     | -3.86    | 3.03E-07 |
| AFUA_2G10810 | Nuclear protein export protein Yrb2, putative                                            | -3.67                                      | -3.85     | -2.59    | 3.31E-02 |
| AFUA_1G06830 | 60S acidic ribosomal protein P1 (AfP1)                                                   | -3.67                                      | -3.62     | -1.95    | 2.73E-05 |
| AFUA_7G04930 | Alkaline serine protease (PR1)/allergen F18-like (EC 3.4.21.-)                           | -3.63                                      | -5.32     | -5.53    | 1.14E-06 |
| AFUA_1G01950 | Uncharacterized protein                                                                  | -3.62                                      | -4.06     | -3.24    | 4.23E-04 |
| AFUA_6G10700 | Chaperonin, putative                                                                     | -3.60                                      | -4.94     | -3.42    | 8.19E-05 |
| AFUA_1G13550 | Uncharacterized protein                                                                  | -3.59                                      | -6.12     | -5.23    | 5.82E-03 |
| AFUA_2G08640 | Uncharacterized protein                                                                  | -3.54                                      | -3.32     | -2.18    | 4.06E-04 |
| AFUA_4G00860 | Cell surface protein, putative                                                           | -3.54                                      | -5.64     | -4.62    | 1.37E-07 |
| AFUA_6G09120 | Uncharacterized protein                                                                  | -3.52                                      | -4.91     | -2.97    | 1.10E-05 |
| AFUA_2G14330 | Uncharacterized protein                                                                  | -3.51                                      | -5.48     | -6.27    | 2.39E-06 |
| AFUA_5G13100 | Uncharacterized protein                                                                  | -3.50                                      | -5.95     | -5.15    | 9.50E-09 |
| AFUA_4G14205 | Uncharacterized protein                                                                  | -3.49                                      | -6.22     | -4.43    | 9.36E-06 |
| AFUA_2G13040 | GrpE protein homolog                                                                     | -3.48                                      | -4.15     | -3.01    | 2.23E-08 |
| AFUA_7G02340 | L-PSP endoribonuclease family protein (Hmf1), putative                                   | -3.47                                      | -2.50     | -2.31    | 2.66E-06 |
| AFUA_7G01200 | Aspergillopepsin, putative (EC 3.4.23.-)                                                 | -3.45                                      | -4.45     | -2.66    | 8.43E-07 |
| AFUA_4G09600 | GPI anchored protein, putative                                                           | -3.43                                      | -6.26     | -5.82    | 1.33E-07 |
| AFUA_1G08880 | Iron/copper transporter Atx1, putative                                                   | -3.41                                      | -3.69     | -2.06    | 9.37E-11 |
| AFUA_4G10280 | Phosphotransmitter protein Ypd1, putative                                                | -3.40                                      | -3.09     | -2.65    | 1.54E-06 |
| AFUA_4G00730 | HHE domain protein                                                                       | -3.40                                      | -1.32     | -0.37    | 1.99E-09 |
| AFUA_5G12590 | Solid-state culture expressed protein (Aos23), putative                                  | -3.38                                      | -2.76     | -3.75    | 2.32E-03 |
| AFUA_4G09750 | 50S ribosomal protein L12                                                                | -3.36                                      | -4.10     | -3.30    | 9.15E-05 |
| AFUA_1G13670 | Uncharacterized protein                                                                  | -3.36                                      | -3.10     | -2.85    | 4.02E-08 |
| AFUA_7G04030 | Uncharacterized protein                                                                  | -3.36                                      | -4.62     | -2.54    | 1.06E-04 |
| AFUA_7G01340 | RPEL repeat protein                                                                      | -3.36                                      | -5.15     | -5.55    | 4.07E-10 |
| AFUA_3G11550 | LEA domain protein                                                                       | -3.34                                      | -2.74     | -2.50    | 2.51E-06 |
| AFUA_3G10610 | Uncharacterized protein                                                                  | -3.33                                      | -3.48     | -3.28    | 7.75E-04 |
| AFUA_3G12790 | Conserved glutamic acid-rich protein                                                     | -3.32                                      | -3.53     | -3.82    | 1.63E-04 |
| AFUA_7G04520 | Uncharacterized protein                                                                  | -3.31                                      | -5.06     | -4.87    | 1.19E-05 |
| AFUA_4G02805 | Asp hemolysin-like protein                                                               | -3.31                                      | -4.42     | -2.02    | 7.88E-05 |
| AFUA_6G09740 | Thioredoxin reductase gliT (EC 1.8.1.-) (Gliotoxin biosynthesis protein T)               | -3.30                                      | -3.75     | -4.59    | 9.90E-08 |
| AFUA_3G10920 | Telomere and ribosome associated protein Stm1, putative                                  | -3.30                                      | -4.13     | -2.02    | 1.67E-07 |
| AFUA_2G11840 | Transcriptional corepressor Cyc8, putative                                               | -3.28                                      | -3.54     | -2.12    | 4.54E-06 |

|              |                                                                        |       |       |       |          |
|--------------|------------------------------------------------------------------------|-------|-------|-------|----------|
| AFUA_8G01980 | Uncharacterized protein                                                | -3.27 | -4.01 | -3.02 | 3.84E-06 |
| AFUA_3G14260 | Mismatched base pair and cruciform DNA recognition protein, putative   | -3.27 | -5.16 | -3.37 | 2.05E-06 |
| AFUA_4G06820 | Protein ecm33                                                          | -3.26 | -4.32 | -3.59 | 5.49E-10 |
| AFUA_2G10100 | 60S acidic ribosomal protein P2 (Afp2) (allergen Asp f 8)              | -3.24 | -2.65 | -2.04 | 1.16E-06 |
| AFUA_1G13560 | Uncharacterized protein                                                | -3.23 | -5.10 | -3.77 | 1.79E-06 |
| AFUA_5G11390 | APSES transcription factor, putative                                   | -3.22 | -3.30 | -1.63 | 3.38E-04 |
| AFUA_5G14210 | Glucose repressible protein Grg1, putative                             | -3.21 | -7.14 | -4.80 | 1.87E-07 |
| AFUA_6G02260 | Uncharacterized protein                                                | -3.21 | -3.41 | -2.20 | 1.03E-05 |
| AFUA_6G13500 | Uncharacterized protein                                                | -3.21 | -5.61 | -3.77 | 7.19E-07 |
| AFUA_2G01540 | Uncharacterized protein                                                | -3.19 | -3.99 | -2.73 | 1.21E-05 |
| AFUA_1G16840 | Translationally-controlled tumor protein homolog (TCTP)                | -3.18 | -2.43 | -1.94 | 1.32E-06 |
| AFUA_2G03790 | Oxysterol binding protein (Osh7), putative                             | -3.18 | -4.47 | -2.85 | 8.13E-03 |
| AFUA_6G05350 | Probable aspartic-type endopeptidase opsB (EC 3.4.23.-)                | -3.15 | -3.64 | -1.88 | 7.65E-06 |
| AFUA_6G08660 | M protein repeat protein                                               | -3.12 | -3.33 | -2.87 | 4.62E-05 |
| AFUA_4G06670 | Allergen Asp f 7 (allergen Asp f 7)                                    | -3.09 | -1.97 | -1.95 | 2.08E-03 |
| AFUA_2G03590 | 40S ribosomal protein S21                                              | -3.07 | -3.22 | 0.19  | 2.54E-06 |
| AFUA_1G12190 | Uncharacterized protein                                                | -3.06 | -1.41 | -1.50 | 1.89E-05 |
| AFUA_3G08270 | Pyruvate dehydrogenase complex component Pdx1, putative                | -3.01 | -0.87 | 0.46  | 7.81E-03 |
| AFUA_2G10320 | SH3 domain protein                                                     | -2.98 | -2.27 | -2.08 | 2.01E-03 |
| AFUA_3G08230 | MRS7 family protein                                                    | -2.97 | -3.12 | -1.63 | 4.35E-04 |
| AFUA_2G13380 | GATA transcription factor (AreB), putative                             | -2.97 | -2.48 | -2.78 | 4.61E-03 |
| AFUA_2G15810 | Uncharacterized protein                                                | -2.96 | -5.32 | -5.18 | 3.13E-03 |
| AFUA_6G04690 | Uncharacterized protein                                                | -2.96 | -2.89 | -2.57 | 8.64E-03 |
| AFUA_4G10150 | Alpha-glucosidase AgdA, putative (EC 3.2.1.20)                         | -2.96 | -3.13 | -3.34 | 5.33E-05 |
| AFUA_1G17370 | Heat shock protein Awh11, putative                                     | -2.95 | -5.23 | -4.26 | 4.25E-07 |
| AFUA_4G12450 | Conserved lysine-rich protein, putative                                | -2.94 | -2.01 | -0.91 | 1.88E-07 |
| AFUA_3G05570 | Spindle poison sensitivity protein Scp3, putative                      | -2.94 | -5.28 | -4.83 | 4.20E-04 |
| AFUA_6G07390 | Isocitrate dehydrogenase LysB (EC 1.1.1.41)                            | -2.92 | -1.46 | -1.36 | 9.63E-11 |
| AFUA_7G04210 | Tropomyosin, putative                                                  | -2.91 | -3.60 | -2.17 | 6.38E-06 |
| AFUA_4G11110 | C2 domain protein                                                      | -2.90 | -2.46 | -1.53 | 7.18E-05 |
| AFUA_6G08530 | Sister chromatid separation protein (Src1), putative                   | -2.89 | -0.99 | -1.07 | 5.71E-03 |
| AFUA_1G03580 | Uncharacterized protein                                                | -2.87 | -3.41 | -3.86 | 1.07E-03 |
| AFUA_3G05430 | ATP-dependent RNA helicase dhh1 (EC 3.6.4.13)                          | -2.86 | -5.81 | -4.16 | 7.98E-04 |
| AFUA_4G12490 | Guanine nucleotide exchange factor Vps9, putative                      | -2.86 | -4.52 | -3.77 | 1.66E-04 |
| AFUA_7G01510 | SNARE domain protein                                                   | -2.85 | -1.22 | -1.04 | 5.25E-05 |
| AFUA_5G10550 | ATP synthase subunit beta (EC 3.6.3.14)                                | -2.85 | -3.44 | -1.63 | 9.29E-07 |
| AFUA_2G07950 | ATP dependent RNA helicase, putative                                   | -2.84 | -2.54 | -2.06 | 4.88E-04 |
| AFUA_3G09030 | Regulatory protein SUAPRGA1                                            | -2.83 | -3.80 | -3.30 | 3.56E-03 |
| AFUA_3G10410 | Conserved serine-rich protein                                          | -2.82 | -4.81 | -3.94 | 3.68E-05 |
| AFUA_7G06010 | Uncharacterized protein                                                | -2.81 | -1.84 | -1.57 | 3.36E-04 |
| AFUA_6G12500 | AhpC/TSA family protein                                                | -2.80 | -1.50 | -0.18 | 2.31E-08 |
| AFUA_8G00550 | Methyltransferase psoC (EC 2.1.1.-) (Pseurotin biosynthesis protein C) | -2.78 | -2.15 | -2.19 | 2.53E-08 |
| AFUA_2G05635 | Uncharacterized protein                                                | -2.73 | -4.18 | -4.06 | 4.08E-03 |
| AFUA_1G09030 | Uncharacterized protein                                                | -2.72 | -3.81 | -1.86 | 4.70E-07 |
| AFUA_4G09740 | T-complex protein 1, theta subunit, putative                           | -2.71 | -4.22 | -2.49 | 2.19E-07 |
| AFUA_5G02420 | Splicing factor 3a subunit 3, putative                                 | -2.70 | -4.03 | -2.28 | 1.60E-02 |
| AFUA_7G02020 | Uncharacterized protein                                                | -2.67 | -3.38 | -2.69 | 3.83E-05 |
| AFUA_1G09280 | Protein phosphatase 2C, putative (EC 3.1.3.16)                         | -2.66 | -2.78 | -1.51 | 2.23E-03 |
| AFUA_6G06670 | Uncharacterized protein                                                | -2.65 | -2.85 | -2.68 | 5.35E-05 |
| AFUA_3G13430 | Uncharacterized protein                                                | -2.63 | -2.56 | -3.12 | 2.45E-02 |
| AFUA_5G11320 | Thioredoxin                                                            | -2.63 | -1.09 | -1.17 | 8.05E-05 |
| AFUA_6G07120 | Nuclear movement protein NudC                                          | -2.62 | -1.57 | -1.32 | 5.54E-05 |
| AFUA_2G17330 | Extracellular serine carboxypeptidase, putative (EC 3.4.-.-)           | -2.62 | -0.17 | -0.75 | 2.88E-06 |
| AFUA_1G07280 | Uncharacterized protein                                                | -2.60 | -2.14 | -0.97 | 1.21E-05 |
| AFUA_8G01090 | Thioredoxin, putative                                                  | -2.59 | -0.57 | -0.53 | 3.58E-04 |
| AFUA_2G15070 | 26S proteasome regulatory subunit S5A                                  | -2.59 | -4.07 | -3.12 | 8.53E-06 |
| AFUA_3G09990 | Uncharacterized protein                                                | -2.59 | -3.39 | -2.84 | 4.40E-04 |

|              |                                                                                                                                                  |       |       |       |          |
|--------------|--------------------------------------------------------------------------------------------------------------------------------------------------|-------|-------|-------|----------|
| AFUA_1G12390 | G2/M phase checkpoint control protein Sum2, putative                                                                                             | -2.58 | -3.14 | -1.76 | 3.72E-05 |
| AFUA_4G01030 | Uncharacterized protein                                                                                                                          | -2.57 | -1.27 | -2.29 | 2.17E-05 |
| AFUA_2G15180 | Uncharacterized protein                                                                                                                          | -2.56 | -0.07 | 0.65  | 5.13E-03 |
| AFUA_8G04310 | Uncharacterized protein                                                                                                                          | -2.55 | -3.87 | -2.86 | 2.62E-03 |
| AFUA_4G09280 | Uncharacterized protein                                                                                                                          | -2.55 | -2.57 | -1.65 | 1.51E-06 |
| AFUA_2G15290 | DUF636 domain protein                                                                                                                            | -2.54 | -2.53 | 0.18  | 8.12E-06 |
| AFUA_2G09800 | Uncharacterized protein                                                                                                                          | -2.51 | -1.75 | -1.43 | 9.85E-04 |
| AFUA_2G18000 | Chanoclavine-I dehydrogenase easD (ChaDH) (EC 1.1.1.332) (Ergot alkaloid synthesis protein A)                                                    | -2.51 | -0.60 | 0.40  | 5.63E-03 |
| AFUA_6G08320 | Uncharacterized protein                                                                                                                          | -2.49 | -3.08 | -2.11 | 1.21E-07 |
| AFUA_8G04270 | AAA family ATPase, putative                                                                                                                      | -2.48 | -3.22 | -2.58 | 4.41E-04 |
| AFUA_6G12430 | Ran-interacting protein Mog1, putative                                                                                                           | -2.45 | -1.91 | -0.83 | 9.45E-04 |
| AFUA_3G00600 | Uncharacterized protein                                                                                                                          | -2.43 | -0.04 | -0.17 | 2.70E-07 |
| AFUA_6G13120 | Filament-forming protein (Tpr/p270), putative                                                                                                    | -2.42 | -2.55 | -1.72 | 5.43E-07 |
| AFUA_6G12680 | HIT domain protein                                                                                                                               | -2.42 | 0.27  | 0.12  | 3.25E-07 |
| AFUA_3G02340 | CBF/NF-Y family transcription factor, putative                                                                                                   | -2.41 | -3.75 | -2.28 | 4.63E-04 |
| AFUA_2G09290 | Antigenic mitochondrial protein HSP60, putative                                                                                                  | -2.39 | -1.04 | -0.37 | 4.15E-11 |
| AFUA_6G10930 | Extracellular protein, putative (EC 2.7.7.6)                                                                                                     | -2.39 | -0.17 | -1.71 | 1.38E-07 |
| AFUA_7G02170 | Peptidyl-prolyl cis-trans isomerase-like 4 (PPIase) (EC 5.2.1.8) (Rotamase)                                                                      | -2.38 | -2.47 | -1.41 | 4.54E-02 |
| AFUA_2G15840 | HET-C domain protein HetC                                                                                                                        | -2.38 | -1.65 | -1.82 | 8.39E-03 |
| AFUA_4G14490 | Oxidoreductase tpcJ (EC 1.-.-) (Trypacidin synthesis protein J)                                                                                  | -2.37 | 0.01  | 0.16  | 2.53E-05 |
| AFUA_1G05220 | Selenoprotein domain protein                                                                                                                     | -2.37 | -0.79 | -0.23 | 1.50E-04 |
| AFUA_1G16430 | Uncharacterized protein                                                                                                                          | -2.37 | -0.51 | -0.09 | 1.67E-03 |
| AFUA_2G12190 | Mitochondrial import inner membrane translocase subunit tim13                                                                                    | -2.36 | -2.32 | -1.49 | 2.80E-03 |
| AFUA_7G01010 | Alcohol dehydrogenase, putative (EC 1.1.1.1)                                                                                                     | -2.36 | -1.74 | -1.73 | 3.63E-08 |
| AFUA_3G06460 | Uncharacterized protein                                                                                                                          | -2.35 | -1.54 | 0.04  | 1.35E-05 |
| AFUA_8G05650 | Uncharacterized protein                                                                                                                          | -2.35 | -3.36 | -3.61 | 2.53E-03 |
| AFUA_4G03420 | L-PSP endoribonuclease family protein, putative                                                                                                  | -2.35 | -2.93 | -1.93 | 1.30E-03 |
| AFUA_1G12590 | RNA-binding La domain protein                                                                                                                    | -2.34 | -2.41 | -2.04 | 2.24E-03 |
| AFUA_7G02570 | NIMA-interacting protein TinC                                                                                                                    | -2.34 | -2.21 | -1.85 | 1.13E-03 |
| AFUA_3G10190 | Peroxisomal membrane anchor protein (Pex14), putative                                                                                            | -2.34 | -2.48 | -3.06 | 2.78E-03 |
| AFUA_1G15050 | Hsp70 family chaperone Lhs1/Orp150, putative                                                                                                     | -2.32 | -0.79 | 0.27  | 2.11E-05 |
| AFUA_6G12290 | PH domain protein                                                                                                                                | -2.32 | -2.92 | -2.73 | 1.83E-04 |
| AFUA_6G04610 | DNA-directed RNA polymerase I and III 14 kDa polypeptide                                                                                         | -2.32 | -2.56 | -1.91 | 1.48E-02 |
| AFUA_2G10030 | Actin cytoskeleton protein (VIP1), putative                                                                                                      | -2.32 | -2.87 | -1.72 | 1.19E-09 |
| AFUA_5G14740 | Fucose-specific lectin FleA                                                                                                                      | -2.31 | -0.76 | -1.64 | 2.23E-06 |
| AFUA_5G09380 | Uncharacterized protein                                                                                                                          | -2.31 | -3.71 | -2.68 | 1.67E-03 |
| AFUA_2G08360 | Orotidine 5'-phosphate decarboxylase (EC 4.1.1.23) (OMP decarboxylase) (OMPDCase) (OMPDecase) (Uridine 5'-monophosphate synthase) (UMP synthase) | -2.29 | -0.48 | -0.23 | 9.06E-06 |
| AFUA_2G13820 | SAP domain protein, putative                                                                                                                     | -2.28 | -1.54 | -1.70 | 9.89E-07 |
| AFUA_7G04950 | Lipase, putative (EC 3.1.1.-)                                                                                                                    | -2.28 | -4.33 | -0.49 | 1.12E-06 |
| AFUA_7G04920 | Uncharacterized protein                                                                                                                          | -2.28 | -3.48 | -3.20 | 3.66E-02 |
| AFUA_3G13850 | LRP16 family protein                                                                                                                             | -2.27 | -4.37 | -4.88 | 1.16E-03 |
| AFUA_2G11740 | Lon protease homolog, mitochondrial (EC 3.4.21.53)                                                                                               | -2.25 | -3.40 | -2.33 | 9.12E-05 |
| AFUA_3G00240 | TPR domain protein                                                                                                                               | -2.23 | 1.00  | -1.43 | 2.05E-05 |
| AFUA_8G07060 | Hydrophobin, putative                                                                                                                            | -2.23 | -1.93 | -2.21 | 1.08E-07 |
| AFUA_5G04160 | NTF2 and RRM domain protein                                                                                                                      | -2.21 | -2.29 | -1.29 | 2.29E-03 |
| AFUA_1G06680 | VHS domain protein                                                                                                                               | -2.21 | -1.78 | -1.34 | 5.91E-04 |
| AFUA_8G04570 | PWWP domain protein                                                                                                                              | -2.20 | -2.26 | -1.89 | 4.06E-07 |
| AFUA_2G08540 | DNA-directed RNA polymerase subunit                                                                                                              | -2.19 | -2.84 | -1.80 | 1.46E-05 |
| AFUA_2G08150 | NEDD8-like protein (RubA), putative                                                                                                              | -2.17 | -1.48 | -1.23 | 4.94E-06 |
| AFUA_2G14490 | Endoglucanase, putative (EC 3.2.1.-)                                                                                                             | -2.17 | -3.83 | -3.33 | 1.17E-04 |
| AFUA_4G14800 | Short chain dehydrogenase 1 (EC 1.1.1.-) (Helvolic acid synthesis protein sdr1)                                                                  | -2.17 | 0.72  | -0.14 | 1.77E-03 |
| AFUA_2G05540 | Pre-mRNA-splicing factor cef1                                                                                                                    | -2.16 | -3.57 | -3.66 | 5.22E-03 |
| AFUA_8G06970 | Beta-glucosidase (EC 3.2.1.21)                                                                                                                   | -2.14 | -2.14 | -1.45 | 1.78E-02 |
| AFUA_5G10240 | Uncharacterized protein                                                                                                                          | -2.14 | -2.48 | -1.96 | 4.17E-04 |

|              |                                                                              |       |       |       |          |
|--------------|------------------------------------------------------------------------------|-------|-------|-------|----------|
| AFUA_2G11860 | Uncharacterized protein                                                      | -2.13 | -2.64 | -2.05 | 1.13E-06 |
| AFUA_6G03210 | Conidiation-specific protein (Con-10), putative                              | -2.13 | -4.73 | -3.82 | 3.46E-04 |
| AFUA_4G09580 | Major allergen Asp f 2 (Allergen Asp f II) (allergen Asp f 2)                | -2.12 | -2.88 | -2.68 | 1.20E-03 |
| AFUA_2G10600 | NADH-ubiquinone oxidoreductase 299 kDa subunit, putative (EC 1.6.5.3)        | -2.11 | -2.28 | -1.33 | 2.39E-07 |
| AFUA_1G02420 | Uncharacterized protein                                                      | -2.11 | -1.73 | -0.73 | 7.63E-03 |
| AFUA_8G01530 | HHE domain protein                                                           | -2.10 | -0.30 | 0.86  | 2.42E-06 |
| AFUA_1G08840 | Guanylate kinase (EC 2.7.4.8)                                                | -2.09 | -1.18 | -1.17 | 4.52E-06 |
| AFUA_2G03010 | Cytochrome c subunit Vb, putative                                            | -2.09 | -3.83 | -3.13 | 8.44E-07 |
| AFUA_4G10540 | Transcription regulator BDF1, putative                                       | -2.07 | -1.51 | -0.99 | 3.91E-03 |
| AFUA_2G09490 | Eukaryotic translation initiation factor subunit eIF-4F, putative            | -2.07 | -1.60 | -1.44 | 4.05E-05 |
| AFUA_5G02910 | NAP family protein                                                           | -2.07 | 0.27  | -0.15 | 4.27E-06 |
| AFUA_3G10700 | Actin-related protein 2/3 complex subunit 5                                  | -2.06 | -0.39 | -0.64 | 1.23E-04 |
| AFUA_2G02320 | Hsp70 chaperone (BiP), putative                                              | -2.06 | -3.07 | -2.16 | 3.26E-05 |
| AFUA_8G07130 | AhpC/TSA family thioredoxin peroxidase, putative                             | -2.06 | -2.15 | 0.17  | 1.13E-05 |
| AFUA_4G10010 | Hsp90 co-chaperone Cdc37                                                     | -2.06 | -1.27 | -1.10 | 4.25E-04 |
| AFUA_3G13820 | Glycolipid transfer protein HET-C2, putative                                 | -2.05 | -0.16 | 0.16  | 2.64E-05 |
| AFUA_5G07040 | Ubiquitin conjugating enzyme (UbcA), putative (EC 6.3.2.19)                  | -2.05 | -1.20 | 0.75  | 3.16E-02 |
| AFUA_7G00580 | Uncharacterized protein                                                      | -2.04 | -1.96 | -2.49 | 3.96E-07 |
| AFUA_1G09250 | CUE domain protein, putative                                                 | -2.03 | -3.06 | -2.38 | 4.12E-02 |
| AFUA_2G00970 | Alcohol dehydrogenase, zinc-containing, putative (EC 1.1.1.1)                | -2.01 | 0.95  | 1.71  | 3.73E-04 |
| AFUA_6G03820 | Nascent polypeptide-associated complex subunit alpha (NAC-alpha) (Alpha-NAC) | -2.01 | -2.13 | -0.86 | 4.66E-06 |
| AFUA_1G17310 | MFS lactose permease, putative                                               | -2.01 | -1.93 | -1.04 | 3.30E-05 |
| AFUA_6G00160 | Ser/Thr protein phosphatase family protein                                   | -2.01 | -0.50 | 0.46  | 5.58E-04 |
| AFUA_2G07600 | SRP receptor beta subunit (Srp102), putative                                 | -2.01 | -4.19 | -2.72 | 3.98E-03 |
| AFUA_2G08670 | Acetyl-CoA carboxylase                                                       | -2.01 | -2.80 | -1.74 | 3.47E-02 |
| AFUA_7G05470 | Electron transfer flavoprotein alpha subunit, putative                       | -2.00 | -1.96 | -2.30 | 2.77E-03 |
| AFUA_8G04920 | LEA domain protein                                                           | -2.00 | -2.70 | -2.54 | 4.55E-04 |
| AFUA_2G02360 | UDP-glucose:glycoprotein glucosyltransferase, putative                       | -1.99 | -1.10 | 0.04  | 3.50E-02 |
| AFUA_3G06140 | Cytoskeleton assembly control protein Sla2, putative                         | -1.99 | -1.49 | -0.90 | 7.32E-06 |
| AFUA_1G11870 | Mitochondrial processing peptidase alpha subunit, putative (EC 3.4.24.64)    | -1.96 | -2.37 | -1.88 | 1.36E-02 |
| AFUA_1G06170 | Proteasome regulatory particle subunit Rpt5, putative                        | -1.96 | -2.16 | -0.64 | 2.13E-03 |
| AFUA_4G08030 | MICOS complex subunit mic60 (Mitofilin)                                      | -1.95 | -2.68 | -1.76 | 2.21E-02 |
| AFUA_3G01790 | Isoflavone reductase family protein (EC 1.3.1.-)                             | -1.93 | -0.08 | 0.47  | 1.54E-03 |
| AFUA_3G02220 | DUF427 domain protein                                                        | -1.93 | -0.73 | -1.26 | 2.89E-03 |
| AFUA_6G14540 | Endo-1,3(4)-beta-glucanase, putative (EC 3.2.1.6)                            | -1.93 | -0.56 | -1.11 | 1.81E-02 |
| AFUA_1G04470 | Mitochondrial import inner membrane translocase subunit tim10                | -1.92 | -3.78 | -2.26 | 1.15E-03 |
| AFUA_1G09830 | Hsc70 cochaperone (SGT), putative (EC 3.1.3.16)                              | -1.92 | -1.61 | -1.14 | 1.16E-04 |
| AFUA_7G01860 | Heat shock protein (Sti1), putative                                          | -1.92 | -1.21 | -0.96 | 2.63E-07 |
| AFUA_1G10350 | Phosphoglycerate kinase (EC 2.7.2.3)                                         | -1.92 | -0.46 | 0.75  | 1.36E-09 |
| AFUA_2G16020 | T-complex protein 1, alpha subunit, putative                                 | -1.91 | -3.60 | -1.79 | 1.56E-02 |
| AFUA_2G01250 | Serine peptidase, putative (EC 3.4.-.-)                                      | -1.91 | -1.15 | -1.51 | 1.13E-04 |
| AFUA_2G13590 | Uncharacterized protein                                                      | -1.88 | -1.80 | -2.20 | 1.78E-07 |
| AFUA_2G11060 | Acyl CoA binding protein family                                              | -1.87 | -1.01 | -1.69 | 2.34E-07 |
| AFUA_3G09870 | Uncharacterized protein                                                      | -1.85 | -2.52 | -2.36 | 9.93E-03 |
| AFUA_2G03360 | Polarized growth protein (Boi2), putative                                    | -1.85 | -0.59 | -0.52 | 3.78E-03 |
| AFUA_5G07240 | SAP domain protein                                                           | -1.84 | -2.11 | -2.42 | 1.82E-03 |
| AFUA_5G02750 | Cytochrome c oxidase subunit Va, putative                                    | -1.79 | -3.20 | -2.26 | 3.37E-07 |
| AFUA_4G03780 | Probable rhamnogalacturonate lyase A (EC 4.2.2.23)                           | -1.78 | -2.88 | -2.67 | 2.33E-02 |
| AFUA_7G06610 | Isochorismatase family hydrolase, putative                                   | -1.78 | -0.51 | 1.29  | 2.45E-03 |
| AFUA_5G11100 | DUF775 domain protein                                                        | -1.78 | -0.37 | 0.49  | 4.00E-02 |
| AFUA_5G01340 | Lysophospholipase 2 (EC 3.1.1.5) (Phospholipase B 2)                         | -1.77 | -1.14 | -1.25 | 2.57E-06 |
| AFUA_5G07080 | Beta-glucosidase, putative (EC 3.2.1.21)                                     | -1.76 | -1.77 | -1.67 | 3.56E-05 |
| AFUA_1G09330 | Eukaryotic translation initiation factor 3 subunit F (eIF3f)                 | -1.76 | -1.75 | -0.85 | 7.35E-03 |
| AFUA_8G02730 | Translation machinery-associated protein 22                                  | -1.76 | -0.86 | -0.69 | 2.28E-03 |

|              |                                                                                                                 |       |       |       |          |
|--------------|-----------------------------------------------------------------------------------------------------------------|-------|-------|-------|----------|
| AFUA_1G10630 | S-adenosylmethionine synthase (EC 2.5.1.6)                                                                      | -1.74 | -1.55 | -0.37 | 1.75E-03 |
| AFUA_3G07870 | Extracellular serine-rich protein, putative                                                                     | -1.73 | -2.89 | -3.23 | 1.27E-06 |
| AFUA_4G11390 | Ubiquinol-cytochrome c reductase complex 17 kd protein                                                          | -1.72 | -2.64 | -2.94 | 3.97E-08 |
| AFUA_3G00840 | FAD-dependent oxygenase, putative                                                                               | -1.72 | -1.31 | -1.95 | 3.99E-09 |
| AFUA_7G04320 | UBX domain protein (Ubx5), putative                                                                             | -1.71 | 0.06  | -0.06 | 4.69E-02 |
| AFUA_3G08420 | Cystathionine beta-synthase (Beta-thionase), putative                                                           | -1.70 | 0.51  | 0.93  | 1.06E-04 |
| AFUA_7G03870 | Actin cytoskeleton-regulatory complex protein pan1                                                              | -1.70 | -1.04 | -1.43 | 2.40E-03 |
| AFUA_1G06660 | CBS domain protein                                                                                              | -1.69 | -1.60 | -0.57 | 2.84E-02 |
| AFUA_1G15780 | 3-isopropylmalate dehydrogenase (EC 1.1.1.85)                                                                   | -1.67 | -2.72 | -2.26 | 5.25E-09 |
| AFUA_7G06050 | DNA damage-inducible protein 1                                                                                  | -1.67 | -1.35 | -1.16 | 7.27E-03 |
| AFUA_3G08750 | Uncharacterized protein                                                                                         | -1.66 | -0.72 | -0.10 | 1.27E-02 |
| AFUA_4G07340 | Ubiquitin fusion degradation protein UfdB, putative                                                             | -1.65 | -1.55 | -1.21 | 2.91E-02 |
| AFUA_7G06820 | Galactose oxidase, putative (EC 1.1.3.9)                                                                        | -1.63 | -0.76 | -0.86 | 7.89E-03 |
| AFUA_6G06370 | Isocitrate dehydrogenase [NAD] subunit, mitochondrial                                                           | -1.61 | -1.44 | -0.10 | 7.68E-05 |
| AFUA_3G14970 | Thioredoxin                                                                                                     | -1.60 | -0.17 | 0.01  | 4.41E-04 |
| AFUA_2G05400 | Sugar hydrolase, putative                                                                                       | -1.59 | -1.70 | -1.59 | 7.69E-05 |
| AFUA_2G14670 | Eukaryotic translation initiation factor 3 subunit D (eIF3d)                                                    | -1.59 | -2.17 | -1.62 | 2.36E-02 |
| AFUA_5G04250 | Homocysteine synthase CysD (EC 2.5.1.49)                                                                        | -1.59 | -1.11 | -1.34 | 1.11E-05 |
| AFUA_3G13240 | Aldose 1-epimerase, putative (EC 5.1.3.3)                                                                       | -1.59 | -1.36 | -2.73 | 2.77E-06 |
| AFUA_6G08360 | Thiamine thiazole synthase (Thiazole biosynthetic enzyme)                                                       | -1.59 | -0.65 | -2.09 | 9.43E-06 |
| AFUA_4G14510 | Methyltransferase tpcH (EC 2.1.1.-) (Trypacidin synthesis protein H)                                            | -1.58 | -0.95 | 0.45  | 5.38E-04 |
| AFUA_2G12870 | Vesicular-fusion protein sec17                                                                                  | -1.52 | -1.40 | -0.72 | 1.24E-02 |
| AFUA_3G08880 | Uncharacterized protein                                                                                         | -1.51 | -1.94 | -1.23 | 4.76E-05 |
| AFUA_3G10940 | Peroxisomal membrane protein receptor Pex19, putative                                                           | -1.50 | -0.96 | -1.25 | 1.21E-03 |
| AFUA_4G04318 | Copper resistance protein Crd2, putative                                                                        | -1.49 | -2.35 | -2.86 | 1.30E-07 |
| AFUA_1G09890 | Uncharacterized protein                                                                                         | -1.49 | -1.80 | -1.53 | 3.17E-03 |
| AFUA_5G07120 | RNP domain protein                                                                                              | -1.49 | -1.72 | -0.65 | 1.85E-02 |
| AFUA_1G04550 | HMG box protein, putative                                                                                       | -1.48 | 0.00  | 0.53  | 4.75E-04 |
| AFUA_7G05610 | Glucanase, putative (EC 3.2.1.-)                                                                                | -1.47 | -2.53 | -2.26 | 1.18E-04 |
| AFUA_3G00350 | Uncharacterized protein                                                                                         | -1.46 | -0.43 | -0.95 | 2.62E-04 |
| AFUA_1G03510 | ATP synthase subunit gamma                                                                                      | -1.46 | -1.77 | 0.34  | 8.67E-06 |
| AFUA_2G06150 | Protein disulfide-isomerase (EC 5.3.4.1)                                                                        | -1.44 | -0.37 | 0.05  | 2.32E-07 |
| AFUA_5G06240 | Alcohol dehydrogenase, putative (EC 1.1.1.1)                                                                    | -1.44 | -1.06 | -1.71 | 1.25E-08 |
| AFUA_8G05570 | Transcription factor (Sin3), putative                                                                           | -1.43 | -1.95 | -1.13 | 5.73E-05 |
| AFUA_2G15940 | Cofactor for methionyl- and glutamyl-tRNA synthetases, putative                                                 | -1.42 | -0.57 | -0.27 | 5.33E-04 |
| AFUA_2G17110 | Cell division control protein Cdc48 (EC 3.6.1.-)                                                                | -1.41 | -1.06 | 0.57  | 3.26E-05 |
| AFUA_3G11740 | RNAPII degradation factor Def1, putative                                                                        | -1.40 | -2.40 | -1.63 | 1.23E-02 |
| AFUA_8G02850 | Actin binding protein, putative                                                                                 | -1.40 | -0.91 | -1.18 | 4.94E-03 |
| AFUA_2G13290 | GYF domain protein                                                                                              | -1.40 | -1.66 | -1.13 | 1.99E-02 |
| AFUA_3G00270 | Probable glucan endo-1,3-beta-glucosidase eglC (EC 3.2.1.39) (Endo-1,3-beta-glucanase eglC) (Laminarinase eglC) | -1.39 | 0.35  | -1.60 | 2.49E-06 |
| AFUA_6G04700 | Imidazoleglycerol-phosphate dehydratase (EC 4.2.1.19)                                                           | -1.38 | -1.09 | -0.98 | 9.00E-03 |
| AFUA_5G10920 | DUF221 domain protein, putative                                                                                 | -1.38 | -2.08 | -0.85 | 4.09E-02 |
| AFUA_2G04620 | Hsp70 chaperone BiP/Kar2, putative                                                                              | -1.38 | -0.70 | -0.50 | 5.03E-04 |
| AFUA_4G04550 | Xanthine-guanine phosphoribosyl transferase Xpt1, putative                                                      | -1.37 | -0.71 | -0.55 | 2.25E-03 |
| AFUA_6G03060 | MFS monosaccharide transporter, putative                                                                        | -1.37 | -0.85 | -1.28 | 1.54E-02 |
| AFUA_1G03570 | Acid phosphatase (EC 3.1.3.2)                                                                                   | -1.36 | -0.63 | -0.11 | 3.19E-03 |
| AFUA_1G02020 | SWIB/MDM2 domain protein (EC 5.99.1.2)                                                                          | -1.34 | -0.11 | -0.49 | 2.31E-03 |
| AFUA_6G05210 | Malate dehydrogenase, NAD-dependent (EC 1.1.1.37)                                                               | -1.33 | 0.36  | 0.90  | 1.18E-07 |
| AFUA_4G03240 | Cell wall serine-threonine-rich galactomannoprotein Mpl                                                         | -1.32 | -1.48 | -1.83 | 8.46E-08 |
| AFUA_1G02540 | EF hand domain protein                                                                                          | -1.32 | -1.29 | -1.02 | 3.44E-06 |
| AFUA_4G14500 | Questin oxidase (EC 1.-.-) (Trypacidin synthesis protein K)                                                     | -1.31 | -0.02 | 0.79  | 3.62E-04 |
| AFUA_5G03690 | Phosphatidylinositol transfer protein sfh5 (PITP sfh5)                                                          | -1.29 | -0.48 | 0.46  | 2.08E-03 |

|              |                                                                                                                                                                |       |       |       |          |
|--------------|----------------------------------------------------------------------------------------------------------------------------------------------------------------|-------|-------|-------|----------|
| AFUA_5G01260 | Ankyrin repeat protein                                                                                                                                         | -1.29 | -0.27 | -1.38 | 3.55E-07 |
| AFUA_5G06060 | E3 ubiquitin ligase complex SCF subunit sconC (Sulfur controller C) (Sulfur metabolite repression control protein C)                                           | -1.29 | -0.68 | -0.09 | 1.29E-04 |
| AFUA_5G12940 | Arylsulfatase, putative (EC 3.1.6.1)                                                                                                                           | -1.29 | -0.57 | -1.52 | 5.40E-04 |
| AFUA_5G08970 | Dolichyl-diphosphooligosaccharide--protein glycosyltransferase subunit WBP1 (Oligosaccharyl transferase subunit WBP1) (EC 2.4.99.18)                           | -1.28 | -1.44 | 0.16  | 9.80E-03 |
| AFUA_8G06550 | Carbonic anhydrase (EC 4.2.1.1) (Carbonate dehydratase)                                                                                                        | -1.28 | -1.24 | -1.12 | 2.66E-04 |
| AFUA_1G04320 | 40S ribosomal protein S8                                                                                                                                       | -1.27 | -1.39 | 1.48  | 3.23E-02 |
| AFUA_6G02090 | ATP synthase subunit E, putative (EC 3.6.3.14)                                                                                                                 | -1.26 | -1.17 | -0.77 | 5.70E-06 |
| AFUA_7G04760 | Gamma-glutamyltranspeptidase (EC 2.3.2.2)                                                                                                                      | -1.25 | -0.80 | -0.92 | 8.11E-03 |
| AFUA_3G01070 | Tyrosinase, putative (EC 1.14.18.1)                                                                                                                            | -1.23 | 0.24  | -0.26 | 3.73E-05 |
| AFUA_8G01490 | Endoglucanase, putative                                                                                                                                        | -1.23 | -0.50 | -0.42 | 2.63E-03 |
| AFUA_2G17540 | Multicopper oxidase abr1 (EC 1.-.-.) (Conidial pigment biosynthesis oxidase abr1)                                                                              | -1.23 | -2.30 | -1.71 | 2.97E-04 |
| AFUA_3G07160 | Class V chitinase, putative (EC 3.2.1.14)                                                                                                                      | -1.22 | 0.27  | 1.69  | 2.70E-08 |
| AFUA_3G13750 | Uncharacterized protein                                                                                                                                        | -1.21 | -0.92 | -2.66 | 1.02E-03 |
| AFUA_8G06870 | MFS sugar transporter, putative                                                                                                                                | -1.21 | 0.16  | 0.72  | 2.87E-03 |
| AFUA_6G07855 | Conserved threonine rich protein                                                                                                                               | -1.21 | -0.42 | -1.18 | 1.90E-02 |
| AFUA_7G06840 | Class III aminotransferase, putative (EC 2.6.1.-)                                                                                                              | -1.19 | 1.01  | -0.22 | 8.20E-03 |
| AFUA_8G05440 | Mitochondrial ATPase subunit ATP4, putative (EC 3.6.3.14)                                                                                                      | -1.19 | -1.15 | 0.29  | 5.86E-06 |
| AFUA_6G03810 | ATP synthase D chain, mitochondrial, putative (EC 3.6.3.14)                                                                                                    | -1.19 | -0.38 | 0.74  | 9.43E-03 |
| AFUA_5G13920 | Hsp90 binding co-chaperone (Sba1), putative                                                                                                                    | -1.18 | -0.68 | -0.47 | 3.75E-05 |
| AFUA_3G10490 | DNA damage response protein (Dap1), putative                                                                                                                   | -1.18 | -1.46 | -0.13 | 3.46E-03 |
| AFUA_2G17180 | Sorting nexin mvp1                                                                                                                                             | -1.17 | -0.80 | -0.57 | 3.07E-02 |
| AFUA_6G00510 | NADP-dependent alcohol dehydrogenase (EC 1.1.1.1)                                                                                                              | -1.16 | -1.55 | -1.36 | 3.35E-06 |
| AFUA_3G02200 | Uncharacterized protein                                                                                                                                        | -1.15 | -0.68 | -1.72 | 2.08E-02 |
| AFUA_2G05590 | Ubiquitin carboxyl-terminal hydrolase (EC 3.4.19.12)                                                                                                           | -1.13 | -1.32 | -0.62 | 1.38E-04 |
| AFUA_7G01230 | DnaJ domain protein                                                                                                                                            | -1.13 | -0.49 | -0.95 | 1.92E-02 |
| AFUA_5G10990 | Uncharacterized protein                                                                                                                                        | -1.13 | -0.61 | -1.79 | 7.89E-06 |
| AFUA_2G08190 | Tubulin-specific chaperone A                                                                                                                                   | -1.13 | -0.58 | -0.71 | 5.93E-04 |
| AFUA_2G17550 | Heptaketide hydrolyase ayg1 (EC 3.7.1.-) (Conidial pigment biosynthesis protein ayg1)                                                                          | -1.11 | 1.18  | 0.25  | 5.29E-10 |
| AFUA_2G15760 | Poly(A)+ RNA transport protein (UbaA), putative (EC 6.3.2.19)                                                                                                  | -1.11 | 0.63  | 1.33  | 2.53E-05 |
| AFUA_5G14830 | Glyoxalase family protein (EC 4.4.1.5)                                                                                                                         | -1.10 | -0.19 | -0.36 | 3.12E-04 |
| AFUA_4G00960 | ATP-dependent 6-phosphofructokinase (ATP-PFK) (Phosphofructokinase) (EC 2.7.1.11) (Phosphohexokinase)                                                          | -1.10 | -0.70 | -0.09 | 1.81E-02 |
| AFUA_1G10110 | TIM-barrel enzyme family protein                                                                                                                               | -1.10 | -0.95 | -1.16 | 2.05E-02 |
| AFUA_2G17620 | Cellobiose dehydrogenase                                                                                                                                       | -1.08 | -1.36 | -2.19 | 1.66E-03 |
| AFUA_2G11250 | Aryl-alcohol dehydrogenase Aad14, putative (EC 1.1.1.-)                                                                                                        | -1.07 | 0.70  | 1.79  | 4.39E-05 |
| AFUA_7G03860 | DNA-directed RNA polymerase II subunit RPB11a, putative                                                                                                        | -1.06 | -1.71 | -0.54 | 3.88E-03 |
| AFUA_1G05050 | Cytosine deaminase, putative (EC 3.5.4.1)                                                                                                                      | -1.04 | 0.34  | 0.71  | 2.94E-03 |
| AFUA_3G08940 | Proteasome regulatory particle subunit (RpnL), putative                                                                                                        | -1.03 | 0.27  | 1.05  | 1.13E-02 |
| AFUA_5G08090 | Pyridoxine biosynthesis protein                                                                                                                                | -1.03 | -0.90 | -1.31 | 5.36E-06 |
| AFUA_1G14280 | C6 finger domain protein, putative                                                                                                                             | -1.03 | -0.91 | -2.25 | 6.39E-03 |
| AFUA_2G17600 | Conidial pigment polyketide synthase alb1 (EC 2.3.1.-) (Conidial pigment biosynthesis protein alb1) (Naphthopyrone synthase)                                   | -1.02 | -0.04 | 0.12  | 3.02E-02 |
| AFUA_3G00880 | UPF0619 GPI-anchored membrane protein AFUA_3G00880                                                                                                             | -1.02 | -1.53 | -1.89 | 6.79E-04 |
| AFUA_4G08580 | Mitochondrial peroxiredoxin Prx1, putative (EC 1.11.1.7)                                                                                                       | -1.02 | 0.45  | 2.05  | 7.03E-07 |
| AFUA_5G07890 | SsDNA binding protein, putative                                                                                                                                | -1.01 | -1.33 | -1.91 | 1.19E-06 |
| AFUA_6G07070 | Probable 1,4-beta-D-glucan cellobiohydrolase A (EC 3.2.1.91) (Beta-glucan cellobiohydrolase A) (Cellobiohydrolase D) (Exocellobiohydrolase A) (Exoglucanase A) | -1.01 | -1.12 | 0.42  | 3.99E-02 |
| AFUA_4G07700 | Clathrin heavy chain                                                                                                                                           | 1.01  | 1.28  | 1.93  | 7.89E-07 |

|              |                                                                                                                                |      |       |       |          |
|--------------|--------------------------------------------------------------------------------------------------------------------------------|------|-------|-------|----------|
| AFUA_2G02810 | Alcohol dehydrogenase, zinc-containing, putative                                                                               | 1.02 | 0.68  | 0.87  | 3.08E-02 |
| AFUA_2G11940 | Adenylosuccinate lyase (ASL) (EC 4.3.2.2)<br>(Adenylosuccinase)                                                                | 1.02 | 0.94  | 2.56  | 1.32E-06 |
| AFUA_1G12340 | Carnitine acetyl transferase                                                                                                   | 1.02 | 1.01  | 2.16  | 3.89E-03 |
| AFUA_6G10830 | Serine/threonine-protein phosphatase (EC 3.1.3.16)                                                                             | 1.03 | 0.77  | 1.62  | 3.21E-03 |
| AFUA_3G03000 | Phosphatidylethanolamine-binding protein, putative                                                                             | 1.03 | 1.47  | 1.62  | 1.71E-02 |
| AFUA_5G12130 | Rab small monomeric GTPase Rab7, putative                                                                                      | 1.04 | 0.50  | 0.48  | 4.22E-04 |
| AFUA_6G01790 | Uncharacterized protein                                                                                                        | 1.04 | 0.89  | 1.43  | 2.72E-03 |
| AFUA_2G09210 | 60S ribosomal protein L10                                                                                                      | 1.05 | 0.67  | 3.59  | 2.78E-08 |
| AFUA_7G00860 | Lipoxygenase, putative (EC 1.13.11.-)                                                                                          | 1.05 | 1.73  | 2.86  | 2.58E-04 |
| AFUA_4G09010 | mRNA splicing protein (Prp39), putative                                                                                        | 1.05 | 1.27  | 2.22  | 2.27E-02 |
| AFUA_8G07190 | Uncharacterized protein                                                                                                        | 1.05 | 1.18  | 2.56  | 8.55E-04 |
| AFUA_8G05040 | Dihydrodipicolinate synthetase family protein (EC<br>4.2.1.-)                                                                  | 1.05 | 0.77  | 0.20  | 4.15E-03 |
| AFUA_4G08240 | Zinc-containing alcohol dehydrogenase, putative (EC<br>1.1.1.1)                                                                | 1.05 | -0.23 | -0.58 | 8.38E-08 |
| AFUA_5G05450 | 40S ribosomal protein S1                                                                                                       | 1.05 | 0.25  | 2.44  | 8.15E-08 |
| AFUA_4G11340 | Saccharopine dehydrogenase Lys9, putative (EC<br>1.5.1.7)                                                                      | 1.06 | 0.52  | 1.87  | 2.32E-05 |
| AFUA_1G14170 | Probable beta-galactosidase A (EC 3.2.1.23) (Lactase<br>A)                                                                     | 1.06 | 1.73  | 1.16  | 7.03E-03 |
| AFUA_6G10980 | UV-damaged DNA binding protein, putative                                                                                       | 1.06 | 1.81  | 3.04  | 6.09E-05 |
| AFUA_1G14490 | Aminotransferase, putative                                                                                                     | 1.06 | 1.40  | 1.61  | 1.36E-02 |
| AFUA_2G01220 | GTP cyclohydrolase II, putative (EC 3.5.4.25)                                                                                  | 1.06 | 2.20  | 3.30  | 5.88E-03 |
| AFUA_4G13460 | SNF2 family helicase/ATPase, putative                                                                                          | 1.07 | -0.26 | 1.29  | 1.77E-02 |
| AFUA_1G15720 | Importin beta-1 subunit                                                                                                        | 1.07 | 1.05  | 1.43  | 4.24E-02 |
| AFUA_1G06960 | Pyruvate dehydrogenase E1 component subunit alpha<br>(EC 1.2.4.1)                                                              | 1.08 | 1.40  | 2.85  | 5.87E-08 |
| AFUA_1G05990 | Ribosomal protein L16a                                                                                                         | 1.08 | 0.75  | 3.23  | 1.40E-07 |
| AFUA_2G14470 | Oxidoreductase, FAD-binding, putative                                                                                          | 1.08 | 1.94  | 1.01  | 1.21E-04 |
| AFUA_2G17430 | Oxidoreductase 2-nitropropane dioxygenase family,<br>putative (EC 1.13.11.-)                                                   | 1.09 | 1.52  | 2.01  | 3.46E-03 |
| AFUA_3G06610 | Proteasome regulatory particle subunit (RpnE),<br>putative                                                                     | 1.09 | -0.11 | 1.18  | 1.97E-04 |
| AFUA_6G14330 | 5-oxo-L-prolinase, putative (EC 3.5.2.9)                                                                                       | 1.09 | 0.30  | 1.15  | 3.96E-02 |
| AFUA_4G07435 | 60S ribosomal protein L36                                                                                                      | 1.10 | 0.82  | 4.07  | 2.59E-04 |
| AFUA_3G11900 | Oxidoreductase, zinc-binding (EC 1.1.1.2)                                                                                      | 1.10 | 0.76  | -0.01 | 5.14E-04 |
| AFUA_4G03050 | Profilin                                                                                                                       | 1.11 | 0.85  | 0.86  | 4.83E-03 |
| AFUA_3G10310 | Acetolactate synthase (EC 2.2.1.6)                                                                                             | 1.11 | 2.68  | 2.31  | 4.10E-07 |
| AFUA_6G14340 | Glucosylglycosyltransferase, putative (EC 1.5.3.-)                                                                             | 1.11 | 0.13  | -0.37 | 1.05E-06 |
| AFUA_2G16370 | 60S ribosomal protein L32                                                                                                      | 1.11 | 0.28  | 3.19  | 5.74E-07 |
| AFUA_3G01920 | Acyl-CoA dehydrogenase, putative                                                                                               | 1.11 | -0.77 | -1.31 | 7.17E-04 |
| AFUA_1G06770 | 40S ribosomal protein S26                                                                                                      | 1.12 | 0.35  | 3.21  | 2.81E-03 |
| AFUA_4G04210 | Leucine aminopeptidase 1 (EC 3.4.11.-) (Leucyl<br>aminopeptidase 1) (LAP1)                                                     | 1.12 | -0.05 | 0.08  | 1.65E-04 |
| AFUA_2G15660 | Aldehyde dehydrogenase                                                                                                         | 1.13 | 1.10  | 1.38  | 2.25E-04 |
| AFUA_1G13590 | Uncharacterized protein                                                                                                        | 1.13 | 1.36  | 0.90  | 2.35E-02 |
| AFUA_2G03030 | Pre-mRNA splicing factor (Prp8), putative                                                                                      | 1.14 | 0.09  | 0.09  | 3.31E-02 |
| AFUA_4G08600 | Aldehyde dehydrogenase, putative (EC 1.2.1.3)                                                                                  | 1.14 | 2.06  | 2.52  | 5.58E-06 |
| AFUA_4G04460 | 60S ribosomal protein L13                                                                                                      | 1.14 | 0.48  | 3.26  | 1.59E-08 |
| AFUA_5G07340 | DnaJ domain protein Psi, putative                                                                                              | 1.14 | 0.20  | -0.32 | 9.87E-04 |
| AFUA_2G04460 | Uncharacterized protein                                                                                                        | 1.15 | -0.16 | 0.59  | 3.39E-02 |
| AFUA_4G07845 | 60S ribosomal protein L38, putative                                                                                            | 1.15 | 1.37  | 3.10  | 7.41E-05 |
| AFUA_6G12930 | Aconitate hydratase, mitochondrial (Aconitase) (EC<br>4.2.1.3) (Citrate hydro-lyase) (Homocitrate<br>dehydratase) (EC 4.2.1.-) | 1.16 | 1.88  | 3.20  | 6.24E-07 |
| AFUA_2G09850 | Oxidoreductase, 2-nitropropane dioxygenase family,<br>putative (EC 1.-.-.-)                                                    | 1.16 | -0.08 | 0.05  | 4.17E-02 |
| AFUA_1G15730 | 40S ribosomal protein S22                                                                                                      | 1.16 | 0.42  | 3.28  | 6.61E-06 |
| AFUA_4G11220 | Xanthine dehydrogenase HxA, putative (EC 1.17.1.4)                                                                             | 1.16 | 0.78  | 0.55  | 3.91E-03 |
| AFUA_1G05340 | 40S ribosomal protein S19                                                                                                      | 1.17 | 0.13  | 3.23  | 1.01E-04 |
| AFUA_3G02190 | Uncharacterized protein                                                                                                        | 1.17 | -1.23 | -0.36 | 1.20E-02 |
| AFUA_5G11230 | RAS small monomeric GTPase RasA                                                                                                | 1.17 | 0.92  | 1.22  | 6.77E-03 |
| AFUA_2G03490 | Calcium/calmodulin-dependent protein kinase,<br>putative                                                                       | 1.17 | 0.85  | 1.38  | 1.60E-02 |
| AFUA_1G03740 | Glutamate carboxypeptidase, putative                                                                                           | 1.17 | 0.43  | 0.34  | 1.22E-03 |

|              |                                                                                                              |      |       |       |          |
|--------------|--------------------------------------------------------------------------------------------------------------|------|-------|-------|----------|
| AFUA_7G04380 | Alcohol dehydrogenase, putative (EC 1.1.1.1)                                                                 | 1.17 | 1.16  | 1.10  | 4.69E-03 |
| AFUA_7G01430 | Opsin, putative                                                                                              | 1.17 | 0.44  | 1.26  | 5.24E-04 |
| AFUA_6G14200 | Acetyl-CoA-acetyltransferase, putative (EC 2.3.1.9)                                                          | 1.18 | 0.33  | -0.05 | 1.89E-05 |
| AFUA_4G07910 | Mitochondrial presequence protease (EC 3.4.24.-)                                                             | 1.18 | 1.01  | 1.04  | 7.78E-06 |
| AFUA_2G11150 | Rab GDP dissociation inhibitor                                                                               | 1.18 | 1.90  | 2.40  | 1.79E-04 |
| AFUA_5G07000 | NAD binding Rossmann fold oxidoreductase, putative (EC 1.-.-)                                                | 1.19 | 2.13  | 2.22  | 4.38E-07 |
| AFUA_3G10390 | Uncharacterized protein                                                                                      | 1.19 | 0.52  | 0.28  | 1.60E-04 |
| AFUA_6G12250 | Succinyl-CoA:3-ketoacid-coenzyme A transferase (EC 2.8.3.5)                                                  | 1.20 | 1.90  | 1.74  | 1.35E-02 |
| AFUA_2G01940 | Uncharacterized protein                                                                                      | 1.20 | 0.01  | -1.22 | 2.82E-02 |
| AFUA_1G11770 | COPII-coated vesicle protein SurF4/Erv29, putative                                                           | 1.20 | 0.65  | 2.51  | 2.85E-03 |
| AFUA_2G13530 | Translation elongation factor EF-2 subunit, putative                                                         | 1.20 | 0.63  | 1.73  | 2.42E-07 |
| AFUA_5G11040 | Pantoate--beta-alanine ligase (EC 6.3.2.1)                                                                   | 1.20 | 2.08  | 2.46  | 1.10E-04 |
| AFUA_3G05610 | Uncharacterized protein                                                                                      | 1.20 | 1.33  | 0.81  | 4.71E-05 |
| AFUA_2G04230 | Fumarylacetoacetate hydrolase FahA (EC 3.7.1.2)                                                              | 1.21 | 0.85  | 0.25  | 2.77E-04 |
| AFUA_1G13370 | Aflatoxin B1-aldehyde reductase GliO-like, putative (EC 1.1.1.-)                                             | 1.21 | 1.00  | 1.94  | 2.87E-03 |
| AFUA_2G07500 | Probable Xaa-Pro aminopeptidase pepP (EC 3.4.11.9) (Aminoacylproline aminopeptidase) (Prolidase)             | 1.22 | 0.45  | 0.05  | 4.75E-08 |
| AFUA_2G10520 | Uricase (EC 1.7.3.3) (Urate oxidase)                                                                         | 1.22 | 1.71  | 0.55  | 9.87E-03 |
| AFUA_4G13310 | Metallo-beta-lactamase domain protein, putative                                                              | 1.22 | 1.02  | 0.72  | 1.34E-02 |
| AFUA_3G02257 | Uncharacterized protein                                                                                      | 1.22 | 1.29  | 2.68  | 3.05E-04 |
| AFUA_8G01100 | Melibiase subfamily, putative (EC 3.2.1.22)                                                                  | 1.22 | 1.62  | 2.77  | 4.36E-04 |
| AFUA_2G04940 | KH domain RNA binding protein                                                                                | 1.23 | 0.41  | 1.74  | 1.66E-02 |
| AFUA_2G18030 | Catalase easC (EC 1.11.-.-) (Ergot alkaloid synthesis protein C)                                             | 1.23 | 1.60  | 2.07  | 1.29E-04 |
| AFUA_6G08740 | 3-dehydroshikimate dehydratase, putative (EC 4.2.1.-)                                                        | 1.23 | 1.28  | 1.52  | 1.10E-03 |
| AFUA_8G04810 | Casein kinase, putative (EC 2.7.11.1)                                                                        | 1.23 | 1.84  | 1.89  | 4.01E-02 |
| AFUA_7G02190 | Zinc knuckle nucleic acid binding protein, putative                                                          | 1.23 | -0.28 | -0.32 | 2.60E-03 |
| AFUA_8G04100 | N-acetylglucosamine-6-phosphate deacetylase (EC 3.5.1.25)                                                    | 1.23 | 0.94  | 1.12  | 2.79E-02 |
| AFUA_1G06580 | High expression lethality protein Hel10, putative                                                            | 1.24 | -1.04 | -1.37 | 4.99E-06 |
| AFUA_3G05350 | Histone H2B                                                                                                  | 1.24 | 1.37  | 2.21  | 5.77E-07 |
| AFUA_3G10130 | Fructosyl amino acid oxidasesarcosine oxidase, putative                                                      | 1.24 | 1.03  | 1.15  | 2.40E-02 |
| AFUA_5G12250 | Posttranscriptional regulation nuclease (Mkt1), putative                                                     | 1.24 | 1.75  | 2.19  | 5.16E-05 |
| AFUA_1G11130 | 60S ribosomal protein L6                                                                                     | 1.24 | 0.67  | 2.98  | 4.44E-04 |
| AFUA_1G13140 | G-protein complex alpha subunit GpaA/FadA                                                                    | 1.24 | 0.75  | 1.69  | 9.24E-05 |
| AFUA_6G11380 | Mitochondrial import receptor subunit (Tom20), putative                                                      | 1.25 | -0.59 | -0.38 | 2.28E-03 |
| AFUA_1G02670 | Arp2/3 complex 34 kDa subunit                                                                                | 1.26 | 1.18  | 2.31  | 1.01E-04 |
| AFUA_5G02470 | Thiamine biosynthesis protein (Nmt1), putative                                                               | 1.27 | 0.44  | 0.77  | 8.85E-05 |
| AFUA_1G03070 | Transcription initiation factor TFIID subunit, putative                                                      | 1.27 | 0.46  | 1.37  | 1.73E-02 |
| AFUA_4G11310 | Fructose-1,6-bisphosphatase Fbp1, putative (EC 3.1.3.11)                                                     | 1.27 | 0.19  | 1.11  | 3.52E-03 |
| AFUA_6G08700 | Probable beta-glucosidase F (EC 3.2.1.21) (Beta-D-glucoside glucohydrolase F) (Cellobiase F) (Gentiobiase F) | 1.28 | 0.45  | -0.30 | 1.32E-08 |
| AFUA_6G03520 | Short-chain dehydrogenase/reductase family protein, putative (EC 1.1.1.47)                                   | 1.29 | 0.51  | 0.50  | 5.27E-04 |
| AFUA_4G11730 | Glycerol dehydrogenase (GldB), putative (EC 1.1.1.72)                                                        | 1.29 | 2.83  | 3.70  | 5.34E-07 |
| AFUA_5G04230 | Citrate synthase                                                                                             | 1.29 | 2.25  | 3.43  | 2.08E-07 |
| AFUA_3G09910 | Phosphatidylinositol transporter, putative                                                                   | 1.29 | 1.59  | 2.31  | 5.91E-05 |
| AFUA_1G09810 | Translation machinery-associated protein 20                                                                  | 1.30 | 2.29  | 1.98  | 1.31E-04 |
| AFUA_1G10130 | Adenosylhomocysteinase (EC 3.3.1.1)                                                                          | 1.30 | 1.01  | 2.02  | 3.28E-05 |
| AFUA_4G04200 | Myo-inositol-1(Or 4)-monophosphatase (EC 3.1.3.7)                                                            | 1.30 | 1.26  | 0.92  | 7.10E-03 |
| AFUA_6G10650 | ATP citrate lyase, subunit 1, putative (EC 2.3.3.8)                                                          | 1.30 | 2.00  | 2.76  | 3.74E-08 |
| AFUA_3G04220 | Fatty acid synthase beta subunit, putative                                                                   | 1.30 | 1.38  | 2.47  | 5.78E-09 |
| AFUA_2G15190 | Ribulose-phosphate 3-epimerase (EC 5.1.3.1)                                                                  | 1.31 | 1.55  | 1.37  | 1.38E-07 |
| AFUA_5G10640 | Tyrosine--tRNA ligase (EC 6.1.1.1) (Tyrosyl-tRNA synthetase)                                                 | 1.31 | 0.16  | 2.06  | 2.72E-02 |
| AFUA_4G04660 | Proteasome regulatory particle subunit Rpt6, putative                                                        | 1.32 | 0.28  | 2.21  | 9.10E-03 |
| AFUA_1G05630 | 40S ribosomal protein S3, putative                                                                           | 1.32 | 0.34  | 2.85  | 3.90E-08 |



|              |                                                                                                                                                                                                               |      |       |       |          |
|--------------|---------------------------------------------------------------------------------------------------------------------------------------------------------------------------------------------------------------|------|-------|-------|----------|
| AFUA_6G04210 | Mannosyl-oligosaccharide glucosidase, putative                                                                                                                                                                | 1.32 | 2.11  | 1.78  | 2.46E-05 |
| AFUA_4G06000 | 50S ribosomal protein L3                                                                                                                                                                                      | 1.32 | -0.65 | 1.08  | 1.77E-02 |
| AFUA_3G10730 | 40S ribosomal protein S7                                                                                                                                                                                      | 1.32 | 0.33  | 3.31  | 8.79E-05 |
| AFUA_1G08810 | Glycerol-3-phosphate dehydrogenase (EC 1.1.5.3)                                                                                                                                                               | 1.32 | 0.84  | 1.94  | 5.22E-03 |
| AFUA_5G03480 | Methylenetetrahydrofolate reductase (EC 1.5.1.20)                                                                                                                                                             | 1.32 | 1.59  | 2.06  | 4.56E-02 |
| AFUA_5G06700 | Serine/threonine-protein phosphatase (EC 3.1.3.16)                                                                                                                                                            | 1.32 | 0.64  | 1.04  | 4.23E-02 |
| AFUA_1G06180 | Trimethyllysine dioxygenase TmIH, putative                                                                                                                                                                    | 1.32 | 0.37  | 0.74  | 2.71E-02 |
| AFUA_8G05590 | Oxidoreductase, short chain dehydrogenase/reductase family                                                                                                                                                    | 1.33 | 1.35  | 1.27  | 7.36E-05 |
| AFUA_1G05080 | 60S acidic ribosomal protein P0                                                                                                                                                                               | 1.33 | 0.33  | 2.99  | 1.59E-08 |
| AFUA_6G07080 | WD repeat-containing protein jip5                                                                                                                                                                             | 1.33 | 0.00  | -0.47 | 7.25E-05 |
| AFUA_5G12830 | DUF1264 domain protein                                                                                                                                                                                        | 1.33 | 0.98  | 0.82  | 3.96E-07 |
| AFUA_3G02430 | Uncharacterized protein                                                                                                                                                                                       | 1.34 | 2.01  | 1.93  | 8.65E-07 |
| AFUA_1G04820 | Probable NAD(P)H-dependent D-xylose reductase xyl1 (XR) (EC 1.1.1.307)                                                                                                                                        | 1.34 | 1.48  | 1.27  | 3.13E-08 |
| AFUA_4G11290 | Proteasome activator subunit 4, putative                                                                                                                                                                      | 1.35 | 1.17  | 1.93  | 9.16E-04 |
| AFUA_1G14780 | BAP31 domain protein, putative                                                                                                                                                                                | 1.35 | 0.09  | 1.25  | 4.36E-05 |
| AFUA_1G08940 | Pheromone-processing carboxypeptidase kex1 (EC 3.4.16.6) (Carboxypeptidase D)                                                                                                                                 | 1.35 | 1.13  | 1.04  | 3.43E-02 |
| AFUA_2G16070 | Urease accessory protein UreD                                                                                                                                                                                 | 1.36 | 1.42  | 0.67  | 2.51E-02 |
| AFUA_4G13580 | Gamma-glutamyltranspeptidase (EC 2.3.2.2)                                                                                                                                                                     | 1.36 | 0.72  | 0.27  | 1.00E-05 |
| AFUA_5G13180 | Agmatinase, putative (EC 3.5.3.11)                                                                                                                                                                            | 1.37 | 0.07  | -1.07 | 2.51E-03 |
| AFUA_6G12580 | Anthranilate synthase component I, putative (EC 4.1.3.27)                                                                                                                                                     | 1.37 | 1.63  | 2.21  | 2.10E-07 |
| AFUA_4G13510 | Isocitrate lyase (ICL) (Isocitrate) (Isocitrate) (EC 4.1.3.1) (Methylisocitrate lyase) (MICA) (EC 4.1.3.30) (Threo-D(S)-isocitrate glyoxylate-lyase)                                                          | 1.37 | 2.27  | 3.61  | 6.63E-08 |
| AFUA_1G12610 | Hsp70 chaperone Hsp88                                                                                                                                                                                         | 1.37 | 1.56  | 1.54  | 1.28E-03 |
| AFUA_1G14570 | Histidine biosynthesis trifunctional protein [Includes: Phosphoribosyl-AMP cyclohydrolase (EC 3.5.4.19); Phosphoribosyl-ATP pyrophosphohydrolase (EC 3.6.1.31); Histidinol dehydrogenase (HDH) (EC 1.1.1.23)] | 1.38 | 1.80  | 1.44  | 5.84E-08 |
| AFUA_2G09180 | Coatomer subunit zeta, putative                                                                                                                                                                               | 1.38 | 1.53  | 2.49  | 2.59E-02 |
| AFUA_4G06950 | Integral ER membrane protein Scs2, putative                                                                                                                                                                   | 1.38 | -0.35 | -0.44 | 3.27E-04 |
| AFUA_5G01450 | NADH-dependent flavin oxidoreductase, putative (EC 1.-.-.-)                                                                                                                                                   | 1.38 | 0.75  | 2.43  | 2.37E-02 |
| AFUA_2G17560 | Hydroxynaphthalene reductase arp2 (EC 1.1.-.-) (Conidial pigment biosynthesis oxidase arp2)                                                                                                                   | 1.38 | 1.98  | 2.22  | 3.81E-07 |
| AFUA_4G08490 | Acyl-CoA dehydrogenase, putative (EC 1.3.99.-)                                                                                                                                                                | 1.38 | 0.03  | -0.33 | 7.77E-04 |
| AFUA_4G13170 | G-protein complex beta subunit CpcB                                                                                                                                                                           | 1.39 | 0.68  | 0.52  | 7.53E-06 |
| AFUA_2G01030 | 1-aminocyclopropane-1-carboxylate deaminase, putative (EC 3.5.99.7)                                                                                                                                           | 1.39 | 1.42  | 1.51  | 6.06E-04 |
| AFUA_6G11130 | Possible replication factor-a protein                                                                                                                                                                         | 1.40 | 0.52  | 0.48  | 5.89E-03 |
| AFUA_4G10780 | Ubiquitin-protein ligase (Tom1), putative                                                                                                                                                                     | 1.40 | 0.57  | 1.66  | 3.15E-02 |
| AFUA_6G00370 | Aminotransferase, putative                                                                                                                                                                                    | 1.40 | 1.87  | 0.59  | 1.39E-03 |
| AFUA_4G07710 | Pyruvate carboxylase (EC 6.4.1.1)                                                                                                                                                                             | 1.40 | 1.84  | 2.74  | 9.52E-08 |
| AFUA_6G12990 | Cytosolic large ribosomal subunit protein L7A                                                                                                                                                                 | 1.41 | 1.13  | 3.48  | 6.45E-08 |
| AFUA_3G08840 | Coatomer subunit alpha                                                                                                                                                                                        | 1.41 | 0.96  | 1.73  | 5.58E-06 |
| AFUA_3G08470 | Glucose-6-phosphate 1-dehydrogenase (EC 1.1.1.49)                                                                                                                                                             | 1.41 | 3.06  | 3.33  | 8.66E-07 |
| AFUA_6G00260 | Phosphatidylserine decarboxylase family protein (EC 4.1.1.-)                                                                                                                                                  | 1.42 | 1.79  | 1.02  | 3.32E-05 |
| AFUA_6G08830 | 2-oxoisovalerate dehydrogenase complex alpha subunit, putative (EC 1.2.4.4)                                                                                                                                   | 1.42 | 0.90  | 0.40  | 3.48E-03 |
| AFUA_4G08170 | Succinate-semialdehyde dehydrogenase Uga2, putative (EC 1.2.1.24)                                                                                                                                             | 1.43 | 2.03  | 2.87  | 8.68E-06 |
| AFUA_5G02610 | Cytochrome P450, putative (EC 1.14.-.-)                                                                                                                                                                       | 1.43 | 0.88  | 0.12  | 6.54E-03 |
| AFUA_1G13710 | Isoleucyl-tRNA synthetase, cytoplasmic (EC 6.1.1.5)                                                                                                                                                           | 1.43 | 1.69  | 2.43  | 1.72E-06 |
| AFUA_6G04010 | Chromosome segregation protein Cse1, putative                                                                                                                                                                 | 1.43 | 1.60  | 2.03  | 7.04E-05 |
| AFUA_1G12940 | Mitogen-activated protein kinase hog1 (MAP kinase hog1) (EC 2.7.11.24)                                                                                                                                        | 1.43 | 1.34  | 2.07  | 8.26E-03 |
| AFUA_6G08020 | ABC transporter, putative                                                                                                                                                                                     | 1.44 | 2.23  | 2.27  | 8.59E-04 |
| AFUA_7G01060 | Cysteine-rich secreted protein                                                                                                                                                                                | 1.44 | -1.60 | -0.47 | 8.24E-07 |
| AFUA_3G01580 | GMC oxidoreductase, putative                                                                                                                                                                                  | 1.44 | 1.53  | 1.48  | 2.64E-02 |
| AFUA_1G16600 | Ribonuclease T2, putative (EC 3.1.27.1)                                                                                                                                                                       | 1.44 | -0.63 | -0.49 | 8.65E-03 |
| AFUA_1G02070 | Cytochrome C1/Cyt1, putative (EC 1.10.2.2)                                                                                                                                                                    | 1.45 | 0.49  | 1.37  | 2.80E-02 |

|              |                                                                                                                                                                                                      |      |       |       |          |
|--------------|------------------------------------------------------------------------------------------------------------------------------------------------------------------------------------------------------|------|-------|-------|----------|
| AFUA_3G11710 | Saccharopine dehydrogenase [NAD(+), L-lysine-forming] (SDH) (EC 1.5.1.7) (Lysine--2-oxoglutarate reductase)                                                                                          | 1.46 | 1.93  | 2.62  | 3.46E-05 |
| AFUA_6G03590 | Citrate synthase                                                                                                                                                                                     | 1.46 | 0.88  | 0.73  | 7.70E-05 |
| AFUA_3G05740 | Aldose 1-epimerase, putative (EC 5.1.3.3)                                                                                                                                                            | 1.47 | 1.36  | 1.46  | 1.87E-02 |
| AFUA_5G06680 | 4-aminobutyrate transaminase GatA (EC 2.6.1.19)                                                                                                                                                      | 1.48 | 1.64  | 1.32  | 1.25E-07 |
| AFUA_8G05020 | Beta-hexosaminidase (EC 3.2.1.52)                                                                                                                                                                    | 1.48 | 0.97  | 0.10  | 6.98E-05 |
| AFUA_1G09930 | Glycerol dehydrogenase Gcy1, putative (EC 1.1.1.-)                                                                                                                                                   | 1.48 | 2.06  | 2.98  | 9.11E-09 |
| AFUA_8G00230 | Verruculogen synthase (EC 1.14.11.38) (Fumitremorgin biosynthesis protein F)                                                                                                                         | 1.49 | 2.12  | 2.00  | 2.82E-04 |
| AFUA_3G07300 | ABC multidrug transporter, putative (EC 3.6.3.-)                                                                                                                                                     | 1.49 | 1.40  | 1.92  | 1.46E-03 |
| AFUA_3G05360 | Histone H2A                                                                                                                                                                                          | 1.50 | 2.69  | 3.49  | 3.10E-05 |
| AFUA_4G10800 | 40S ribosomal protein S6                                                                                                                                                                             | 1.50 | 0.17  | 2.43  | 1.34E-05 |
| AFUA_5G08130 | Protein transport protein Sec61 alpha subunit, putative                                                                                                                                              | 1.50 | 0.46  | 1.79  | 2.47E-03 |
| AFUA_2G06320 | Replication protein A 70 kDa DNA-binding subunit                                                                                                                                                     | 1.51 | 0.64  | 0.54  | 2.81E-02 |
| AFUA_4G09140 | L-ornithine aminotransferase Car2, putative (EC 2.6.1.13)                                                                                                                                            | 1.51 | 1.35  | 1.05  | 2.77E-07 |
| AFUA_8G07080 | Extracellular metalloproteinase mep (EC 3.4.24.-) (Elastinolytic metalloproteinase mep) (Fungalysin mep)                                                                                             | 1.52 | 0.41  | 0.16  | 3.81E-02 |
| AFUA_4G08710 | Short chain dehydrogenase, putative (EC 1.-.-)                                                                                                                                                       | 1.52 | 1.69  | 1.11  | 1.14E-08 |
| AFUA_4G11540 | Glycerol kinase, putative (EC 2.7.1.30)                                                                                                                                                              | 1.52 | 3.18  | 2.94  | 5.99E-05 |
| AFUA_1G04620 | Alcohol dehydrogenase, zinc-containing, putative (EC 1.1.1.-)                                                                                                                                        | 1.52 | 1.12  | 2.28  | 9.14E-03 |
| AFUA_8G01780 | Nitrilase, putative                                                                                                                                                                                  | 1.52 | 3.82  | -0.30 | 4.70E-06 |
| AFUA_6G10610 | Ribose 5-phosphate isomerase A (EC 5.3.1.6)                                                                                                                                                          | 1.53 | 0.80  | 0.37  | 1.14E-04 |
| AFUA_1G01970 | VeA-like protein                                                                                                                                                                                     | 1.53 | 2.00  | 3.12  | 1.12E-03 |
| AFUA_2G04130 | 40S ribosomal protein S11                                                                                                                                                                            | 1.54 | 0.29  | 3.44  | 1.24E-05 |
| AFUA_4G04410 | 3-hydroxybutyryl-CoA dehydrogenase, putative (EC 1.1.1.157)                                                                                                                                          | 1.54 | 1.62  | 1.58  | 8.61E-05 |
| AFUA_1G04530 | 60S ribosomal protein L20                                                                                                                                                                            | 1.54 | 0.72  | 3.47  | 2.47E-06 |
| AFUA_5G03760 | Endochitinase A1 (EC 3.2.1.14) (Chitinase A1)                                                                                                                                                        | 1.55 | 1.10  | 1.52  | 1.32E-03 |
| AFUA_4G10770 | Psi-producing oxygenase A (Fatty acid oxygenase ppoA) [Includes: Linoleate 8R-lipoxygenase (EC 1.13.11.60); 9,12-octadecadienoate 8-hydroperoxide 8R-isomerase (EC 5.4.4.5)]                         | 1.55 | -0.58 | -1.21 | 2.94E-06 |
| AFUA_8G01390 | Glycosyl hydrolase, putative                                                                                                                                                                         | 1.55 | 2.14  | 2.67  | 1.14E-04 |
| AFUA_8G01420 | Quinone oxidoreductase, putative (EC 1.6.5.5)                                                                                                                                                        | 1.55 | 1.38  | 1.85  | 5.05E-04 |
| AFUA_4G14520 | Monoxygenase tpcG (EC 1.-.-) (Trypacidin synthesis protein G)                                                                                                                                        | 1.55 | 1.86  | 3.24  | 4.15E-05 |
| AFUA_2G09130 | NADH-ubiquinone dehydrogenase 24 kDa subunit, putative (EC 1.6.5.3)                                                                                                                                  | 1.56 | 1.46  | 1.71  | 3.08E-05 |
| AFUA_2G13250 | Tryptophan synthase (EC 4.2.1.20)                                                                                                                                                                    | 1.57 | 1.05  | 2.10  | 4.86E-03 |
| AFUA_2G09380 | Probable cutinase 1 (EC 3.1.1.74) (Cutin hydrolase 1)                                                                                                                                                | 1.57 | -0.89 | -0.41 | 6.84E-06 |
| AFUA_5G02480 | Glycogen [starch] synthase (EC 2.4.1.11)                                                                                                                                                             | 1.58 | 1.39  | 2.40  | 6.34E-05 |
| AFUA_1G11480 | Uncharacterized protein                                                                                                                                                                              | 1.60 | 1.67  | 0.73  | 7.90E-05 |
| AFUA_5G09450 | Isoflavone reductase family protein (EC 1.3.1.-)                                                                                                                                                     | 1.60 | 1.94  | 2.92  | 3.41E-05 |
| AFUA_6G00750 | Pyruvate decarboxylase, putative (EC 4.1.1.1)                                                                                                                                                        | 1.60 | 1.72  | 1.26  | 4.56E-04 |
| AFUA_3G11480 | Mitochondrial methylglutaconyl-CoA hydratase (Auh), putative (EC 4.2.1.18)                                                                                                                           | 1.61 | 2.12  | 3.01  | 1.14E-06 |
| AFUA_4G00610 | Aryl-alcohol dehydrogenase, putative (EC 1.1.-)                                                                                                                                                      | 1.62 | 2.71  | 2.45  | 1.28E-03 |
| AFUA_4G07650 | Peptidyl-prolyl cis-trans isomerase B (PPIase B) (EC 5.2.1.8) (Rotamase B)                                                                                                                           | 1.62 | 2.05  | 2.52  | 4.36E-03 |
| AFUA_1G14710 | Beta-glucosidase, putative                                                                                                                                                                           | 1.63 | 2.70  | 3.52  | 4.34E-05 |
| AFUA_4G14450 | Mannitol 2-dehydrogenase (M2DH) (MDH) (EC 1.1.1.67)                                                                                                                                                  | 1.63 | 1.31  | 1.97  | 1.45E-06 |
| AFUA_1G02030 | Eukaryotic translation initiation factor 3 subunit B (eIF3b) (Eukaryotic translation initiation factor 3 90 kDa subunit homolog) (eIF3 p90) (Translation initiation factor eIF3 p90 subunit homolog) | 1.64 | 1.28  | 1.67  | 5.02E-03 |
| AFUA_1G08980 | UPF0160 domain protein MYG1, putative                                                                                                                                                                | 1.65 | 1.77  | 1.65  | 1.28E-08 |
| AFUA_8G03880 | Alanine--tRNA ligase (EC 6.1.1.7) (Alanyl-tRNA synthetase) (AlaRS)                                                                                                                                   | 1.65 | 0.33  | 0.70  | 1.65E-02 |
| AFUA_6G12660 | 40S ribosomal protein S10b                                                                                                                                                                           | 1.66 | 0.41  | 4.49  | 1.26E-03 |
| AFUA_1G05390 | Mitochondrial ADP,ATP carrier protein (Ant), putative                                                                                                                                                | 1.66 | 0.56  | 1.46  | 1.52E-03 |
| AFUA_5G03770 | Lipase, putative (EC 3.1.1.3)                                                                                                                                                                        | 1.66 | 1.62  | 2.66  | 1.25E-03 |

|              |                                                                                            |      |       |       |          |
|--------------|--------------------------------------------------------------------------------------------|------|-------|-------|----------|
| AFUA_8G07110 | Alanyl-tRNA synthetase, putative (EC 6.1.1.7)                                              | 1.67 | 2.06  | 2.33  | 2.91E-02 |
| AFUA_3G06840 | 40S ribosomal protein S4                                                                   | 1.67 | 0.34  | 3.34  | 1.55E-08 |
| AFUA_1G05120 | COPII-coated vesicle membrane protein Erv46, putative                                      | 1.67 | -0.05 | 1.37  | 7.16E-03 |
| AFUA_2G10090 | 40S ribosomal protein S15, putative                                                        | 1.67 | 0.87  | 2.93  | 1.64E-04 |
| AFUA_7G01320 | Beta-mannosidase B (EC 3.2.1.25) (Mannase B) (Mannase B)                                   | 1.67 | 2.03  | 1.98  | 7.67E-05 |
| AFUA_3G03060 | Cell wall protein PhiA                                                                     | 1.68 | 0.08  | 1.16  | 3.16E-04 |
| AFUA_5G07740 | DSB repair complex subunit Ku70, putative                                                  | 1.68 | 0.98  | 1.20  | 2.50E-03 |
| AFUA_6G02630 | ATP-dependent RNA helicase sub2 (EC 3.6.4.13)                                              | 1.68 | 0.23  | 1.98  | 3.08E-03 |
| AFUA_5G07750 | Ferrochelatase (EC 4.99.1.1)                                                               | 1.68 | 1.14  | 1.65  | 3.04E-02 |
| AFUA_3G07810 | Succinate dehydrogenase [ubiquinone] flavoprotein subunit, mitochondrial (EC 1.3.5.1)      | 1.68 | 1.72  | 1.63  | 7.09E-11 |
| AFUA_2G04930 | Uncharacterized protein                                                                    | 1.69 | 1.61  | 1.26  | 4.59E-03 |
| AFUA_6G12300 | RNP domain protein                                                                         | 1.69 | 0.90  | 1.09  | 8.91E-05 |
| AFUA_3G10110 | Electron transfer flavoprotein-ubiquinone oxidoreductase (EC 1.5.5.1)                      | 1.69 | 0.95  | 1.96  | 2.07E-02 |
| AFUA_6G10900 | UV-endonuclease UVE-1                                                                      | 1.70 | 2.63  | 2.73  | 1.88E-03 |
| AFUA_5G10370 | Succinate dehydrogenase [ubiquinone] iron-sulfur subunit, mitochondrial (EC 1.3.5.1)       | 1.70 | 1.70  | 1.94  | 1.61E-03 |
| AFUA_5G10280 | Oxidoreductase, acting on the CH-OH group of donors, NAD or NADP as acceptor (EC 1.1.1.31) | 1.71 | 1.70  | 1.26  | 8.32E-03 |
| AFUA_1G03390 | 60S ribosomal protein L12                                                                  | 1.71 | 0.76  | 3.35  | 1.44E-04 |
| AFUA_4G11260 | Aldo-keto reductase, putative (EC 1.1.1.-)                                                 | 1.72 | 2.15  | 1.57  | 5.59E-07 |
| AFUA_6G13250 | 60S ribosomal protein L31e                                                                 | 1.73 | 2.03  | 4.41  | 2.79E-05 |
| AFUA_4G03660 | Acid phosphatase, putative (EC 3.1.3.2)                                                    | 1.73 | 2.31  | 2.00  | 1.27E-04 |
| AFUA_5G09180 | Uncharacterized protein                                                                    | 1.73 | 0.83  | 0.79  | 4.15E-03 |
| AFUA_5G09790 | Beta-lactamase                                                                             | 1.73 | 0.38  | 0.18  | 2.79E-03 |
| AFUA_1G10970 | Coatmer subunit beta (Beta-coat protein)                                                   | 1.74 | 0.71  | 2.18  | 9.06E-03 |
| AFUA_3G00900 | Alpha-amylase, putative                                                                    | 1.74 | 1.28  | 0.97  | 1.10E-05 |
| AFUA_4G12840 | Methylthioribulose-1-phosphate dehydratase (MTRu-1-P dehydratase) (EC 4.2.1.109)           | 1.74 | 1.75  | 1.64  | 1.23E-03 |
| AFUA_2G12630 | Allergen Asp f 15 (Allergen Asp f 13) (allergen Asp f 15)                                  | 1.74 | 0.84  | 1.21  | 7.76E-04 |
| AFUA_5G14310 | Short chain dehydrogenase/reductase family protein                                         | 1.74 | 0.36  | 2.65  | 1.11E-02 |
| AFUA_6G13180 | CECR1 family adenosine deaminase, putative                                                 | 1.74 | 1.99  | 2.52  | 3.02E-05 |
| AFUA_2G02490 | Uncharacterized protein                                                                    | 1.74 | 1.54  | 1.77  | 3.09E-03 |
| AFUA_4G12010 | 2-oxo acid dehydrogenases acyltransferase, putative (EC 2.3.1.-)                           | 1.75 | 0.76  | 0.37  | 2.23E-03 |
| AFUA_2G15430 | Sorbitol/xylulose reductase Sou1-like, putative (EC 1.-.-)                                 | 1.75 | 2.56  | 2.72  | 6.09E-04 |
| AFUA_2G08130 | 60S ribosomal protein L44                                                                  | 1.76 | 1.02  | 4.10  | 2.38E-06 |
| AFUA_4G08480 | 26S proteasome regulatory subunit Rpn2, putative                                           | 1.76 | 0.03  | 2.01  | 1.73E-02 |
| AFUA_2G11020 | Triosephosphate isomerase (EC 5.3.1.1)                                                     | 1.77 | 2.19  | 2.49  | 5.43E-05 |
| AFUA_6G06460 | Fumarylacetoacetate hydrolase family protein                                               | 1.77 | 1.86  | 1.92  | 9.09E-05 |
| AFUA_2G04710 | Cytochrome b5, putative                                                                    | 1.77 | -0.14 | -0.24 | 2.88E-03 |
| AFUA_6G02470 | Fumarate hydratase, putative (EC 4.2.1.2)                                                  | 1.78 | 1.92  | 2.06  | 3.59E-06 |
| AFUA_1G09750 | Aldehyde reductase (AKR1), putative (EC 1.1.1.2)                                           | 1.78 | 3.04  | 3.54  | 1.03E-08 |
| AFUA_1G14410 | 60S ribosomal protein L17                                                                  | 1.79 | 1.58  | 4.32  | 4.06E-08 |
| AFUA_3G01450 | 3-methyl-2-oxobutanoate dehydrogenase, putative                                            | 1.80 | 1.21  | 0.64  | 2.22E-04 |
| AFUA_8G04710 | Xylosidase, putative (EC 3.2.1.37)                                                         | 1.81 | 1.72  | 1.89  | 6.76E-04 |
| AFUA_4G03120 | Mitochondrial cytochrome b2, putative (EC 1.1.2.3)                                         | 1.81 | 1.78  | 1.94  | 1.46E-05 |
| AFUA_4G07580 | Translation initiation factor EF-2 gamma subunit, putative                                 | 1.81 | 0.08  | 1.85  | 2.37E-05 |
| AFUA_1G04540 | NADH-cytochrome b5 reductase 2 (EC 1.6.2.2) (Mitochondrial cytochrome b reductase)         | 1.81 | 1.61  | 2.16  | 3.37E-06 |
| AFUA_5G09920 | Peptidase, putative (EC 3.-.-)                                                             | 1.81 | 2.04  | 1.63  | 2.44E-06 |
| AFUA_1G07200 | Mitochondrial cytochrome b2, putative (EC 1.1.2.3)                                         | 1.82 | 1.54  | 1.70  | 1.56E-06 |
| AFUA_1G05500 | 40S ribosomal protein S12                                                                  | 1.83 | 0.32  | 1.82  | 4.21E-06 |
| AFUA_4G10330 | CaaX farnesyltransferase beta subunit Ram1 (EC 2.5.1.58)                                   | 1.83 | 2.27  | 2.17  | 3.61E-04 |
| AFUA_5G10490 | Amidase, putative (EC 3.5.1.-)                                                             | 1.83 | -0.86 | -1.42 | 3.08E-05 |
| AFUA_5G11610 | Protein arginine N-methyltransferase                                                       | 1.83 | 2.28  | 1.82  | 2.99E-02 |
| AFUA_6G04920 | Formate dehydrogenase (FDH) (EC 1.2.1.2) (NAD-dependent formate dehydrogenase)             | 1.83 | 1.45  | 1.22  | 2.23E-08 |
| AFUA_3G00640 | Uncharacterized protein                                                                    | 1.84 | 0.70  | 2.90  | 2.45E-03 |

|              |                                                                                                                                                                |      |       |       |          |
|--------------|----------------------------------------------------------------------------------------------------------------------------------------------------------------|------|-------|-------|----------|
| AFUA_2G04520 | Fe-containing alcohol dehydrogenase, putative (EC 1.1.1.-)                                                                                                     | 1.84 | 2.61  | 2.46  | 2.08E-05 |
| AFUA_3G12800 | Clathrin-coated vesicle protein (Bud7), putative                                                                                                               | 1.84 | 1.48  | 0.84  | 3.28E-02 |
| AFUA_3G14990 | Alpha/beta hydrolase, putative (EC 3.-.-)                                                                                                                      | 1.85 | 1.14  | 1.66  | 5.44E-05 |
| AFUA_6G08780 | Proline utilization protein PrnX, putative (EC 4.3.1.12)                                                                                                       | 1.85 | 1.46  | 1.85  | 2.55E-03 |
| AFUA_7G02470 | mRNA processing protein (Mss51), putative                                                                                                                      | 1.86 | 2.70  | 3.53  | 1.59E-03 |
| AFUA_7G00700 | Aldo-keto reductase (AKR13), putative (EC 1.1.1.-)                                                                                                             | 1.86 | 1.56  | 2.73  | 2.34E-05 |
| AFUA_5G02530 | Ribokinase (EC 2.7.1.15)                                                                                                                                       | 1.86 | 2.75  | 2.17  | 6.59E-05 |
| AFUA_6G08250 | CwJ domain protein                                                                                                                                             | 1.86 | 0.20  | 0.58  | 1.12E-02 |
| AFUA_4G00280 | Uncharacterized protein                                                                                                                                        | 1.86 | 0.50  | -0.25 | 2.24E-04 |
| AFUA_7G05360 | FACT complex subunit pob3 (Facilitates chromatin transcription complex subunit pob3)                                                                           | 1.86 | 1.41  | 2.07  | 6.65E-04 |
| AFUA_1G15140 | Mitochondrial phosphate carrier protein (Mir1), putative                                                                                                       | 1.88 | 0.40  | 1.45  | 3.74E-04 |
| AFUA_1G14220 | Fibrillarlin                                                                                                                                                   | 1.88 | -0.05 | 1.63  | 5.00E-07 |
| AFUA_5G05480 | Rheb small monomeric GTPase RhbA                                                                                                                               | 1.88 | 1.54  | 1.84  | 1.32E-02 |
| AFUA_6G05110 | Mitochondrial import receptor subunit (Tom40), putative                                                                                                        | 1.88 | 0.90  | 1.59  | 3.67E-04 |
| AFUA_2G05510 | Mitochondrial F1F0 ATP synthase subunit F (Atp17), putative (EC 3.6.3.14)                                                                                      | 1.89 | 1.16  | 2.45  | 1.23E-04 |
| AFUA_4G09840 | Kynureninase 2 (EC 3.7.1.3) (Biosynthesis of nicotinic acid protein 5-2) (L-kynurenine hydrolase 2)                                                            | 1.89 | 1.03  | 1.19  | 1.40E-06 |
| AFUA_2G00330 | Beta-alanine synthase, putative (EC 3.5.1.-)                                                                                                                   | 1.89 | 1.60  | 0.59  | 7.65E-04 |
| AFUA_5G05680 | Peptide chain release factor eRF/aRF, subunit 1                                                                                                                | 1.89 | 1.57  | 2.19  | 8.67E-06 |
| AFUA_8G02780 | Vacuolar protein sorting/targeting protein 10 (Carboxypeptidase Y receptor) (CPY receptor) (Sortilin vps10) (Vacuolar carboxypeptidase sorting receptor vps10) | 1.89 | 0.72  | 1.07  | 1.69E-03 |
| AFUA_4G10200 | Transcription factor RfeF, putative                                                                                                                            | 1.90 | 1.23  | 0.40  | 1.32E-06 |
| AFUA_7G02140 | 40S ribosomal protein S24                                                                                                                                      | 1.90 | 1.10  | 3.49  | 1.13E-02 |
| AFUA_1G04660 | Ribosomal protein L15                                                                                                                                          | 1.90 | 0.74  | 3.30  | 1.58E-05 |
| AFUA_5G12840 | Hydroxyacylglutathione hydrolase, putative (EC 3.1.2.6)                                                                                                        | 1.91 | 1.96  | 1.58  | 2.01E-09 |
| AFUA_6G02280 | Peroxioredoxin Asp f3 (Prx) (EC 1.11.1.15) (Thioredoxin peroxidase) (TPx) (allergen Asp f 3)                                                                   | 1.92 | 1.22  | 1.20  | 9.23E-10 |
| AFUA_6G04570 | Translation elongation factor eEF-1 subunit gamma, putative                                                                                                    | 1.92 | 1.53  | 1.72  | 4.63E-06 |
| AFUA_1G13780 | Histone H4                                                                                                                                                     | 1.92 | 1.56  | 2.39  | 1.19E-03 |
| AFUA_1G09440 | 40S ribosomal protein S23                                                                                                                                      | 1.93 | 0.27  | 4.03  | 1.00E-05 |
| AFUA_1G11535 | Glutaredoxin-like protein                                                                                                                                      | 1.93 | 2.19  | 1.56  | 1.53E-03 |
| AFUA_4G12850 | Calnexin homolog                                                                                                                                               | 1.94 | 2.01  | 1.68  | 1.06E-05 |
| AFUA_5G07360 | Amine oxidase (EC 1.4.3.-)                                                                                                                                     | 1.94 | 0.47  | 0.11  | 3.31E-05 |
| AFUA_4G03900 | Peroxisomal multifunctional beta-oxidation protein (MFP), putative                                                                                             | 1.94 | 0.92  | 0.41  | 2.85E-04 |
| AFUA_5G08900 | D-arabinitol dehydrogenase ArbD, putative (EC 1.1.1.69)                                                                                                        | 1.95 | 0.61  | -0.15 | 2.25E-03 |
| AFUA_5G05820 | Homoserine kinase (EC 2.7.1.39)                                                                                                                                | 1.95 | 0.36  | 1.92  | 3.41E-03 |
| AFUA_3G11070 | Pyruvate decarboxylase (EC 4.1.1.1)                                                                                                                            | 1.95 | 3.42  | 3.43  | 9.50E-08 |
| AFUA_2G16090 | Importin subunit alpha                                                                                                                                         | 1.96 | 0.04  | 1.44  | 2.65E-02 |
| AFUA_4G08410 | Mannose-6-phosphate isomerase, class I (EC 5.3.1.8)                                                                                                            | 1.96 | 2.75  | 1.97  | 8.29E-06 |
| AFUA_5G09640 | Conserved fungal protein                                                                                                                                       | 1.96 | 2.01  | 1.97  | 6.03E-04 |
| AFUA_7G02230 | mRNA binding post-transcriptional regulator (Csx1), putative                                                                                                   | 1.96 | 1.06  | 1.46  | 4.21E-02 |
| AFUA_4G11050 | NADH dehydrogenase [ubiquinone] flavoprotein 1, mitochondrial (EC 1.6.5.3) (EC 1.6.99.3)                                                                       | 1.96 | 1.85  | 3.19  | 1.70E-06 |
| AFUA_4G00740 | Uncharacterized protein                                                                                                                                        | 1.97 | 1.06  | 2.46  | 2.53E-06 |
| AFUA_2G11560 | Galactose-1-phosphate uridylyltransferase (EC 2.7.7.12)                                                                                                        | 1.97 | 1.56  | 1.62  | 1.77E-04 |
| AFUA_6G00600 | Uncharacterized protein                                                                                                                                        | 1.97 | 0.70  | 0.22  | 1.47E-05 |
| AFUA_7G05660 | Translation elongation factor eEF-3, putative (EC 3.6.3.-)                                                                                                     | 1.97 | 0.18  | 0.60  | 1.40E-04 |
| AFUA_6G00180 | Uncharacterized protein                                                                                                                                        | 1.98 | 0.29  | 0.05  | 2.37E-04 |
| AFUA_3G10460 | Nuclear transport factor NTF-2, putative                                                                                                                       | 1.98 | 1.40  | 1.80  | 6.04E-05 |
| AFUA_3G11750 | Oxysterol binding protein (Osh5), putative                                                                                                                     | 1.98 | 1.18  | 2.24  | 1.90E-04 |
| AFUA_7G05510 | RSC complex subunit (RSC8), putative                                                                                                                           | 1.99 | 0.63  | 0.59  | 3.10E-02 |

|              |                                                                                                                                                                                                                   |      |       |       |          |
|--------------|-------------------------------------------------------------------------------------------------------------------------------------------------------------------------------------------------------------------|------|-------|-------|----------|
| AFUA_7G05740 | Malate dehydrogenase (EC 1.1.1.37)                                                                                                                                                                                | 1.99 | 2.20  | 1.80  | 2.64E-09 |
| AFUA_2G10440 | 40S ribosomal protein S11                                                                                                                                                                                         | 2.00 | 0.84  | 3.26  | 6.32E-05 |
| AFUA_1G13280 | Mannose-6-phosphate isomerase (EC 5.3.1.8)<br>(Phosphohexomutase) (Phosphomannose isomerase)<br>(PMI)                                                                                                             | 2.00 | 2.77  | 2.85  | 5.16E-06 |
| AFUA_6G06900 | Rho GTPase Rho1                                                                                                                                                                                                   | 2.00 | 1.49  | 1.54  | 6.27E-06 |
| AFUA_7G05160 | Fumarylacetoacetate hydrolase family protein                                                                                                                                                                      | 2.01 | 2.33  | 1.56  | 1.16E-02 |
| AFUA_4G07610 | Zinc metalloprotease, putative                                                                                                                                                                                    | 2.02 | 1.67  | 0.28  | 2.41E-07 |
| AFUA_6G04660 | Centromere protein Cse4, putative                                                                                                                                                                                 | 2.02 | 1.28  | 2.55  | 1.63E-02 |
| AFUA_4G10610 | Stress responsive A/B barrel domain protein                                                                                                                                                                       | 2.02 | 0.96  | 0.20  | 5.96E-05 |
| AFUA_1G09020 | Nuclear pore complex protein (SonA), putative                                                                                                                                                                     | 2.02 | 1.20  | 1.02  | 2.25E-04 |
| AFUA_7G01460 | Ribosomal protein S5                                                                                                                                                                                              | 2.02 | 0.64  | 3.32  | 4.53E-09 |
| AFUA_2G10500 | 40S ribosomal protein Rps16, putative                                                                                                                                                                             | 2.04 | 1.54  | 3.83  | 3.79E-05 |
| AFUA_1G14850 | Acyl-CoA dehydrogenase, putative (EC 1.3.99.-)                                                                                                                                                                    | 2.04 | 1.69  | 1.34  | 2.97E-10 |
| AFUA_4G12600 | Phosphoribosyl-aminoimidazole carboxylase (EC<br>4.1.1.21)                                                                                                                                                        | 2.05 | 2.13  | 2.49  | 3.52E-06 |
| AFUA_2G04310 | Argininosuccinate synthase (EC 6.3.4.5)                                                                                                                                                                           | 2.05 | 1.20  | 2.41  | 2.55E-03 |
| AFUA_6G10600 | NEDD8-activating enzyme E1 regulatory subunit                                                                                                                                                                     | 2.06 | 1.76  | 2.38  | 5.36E-04 |
| AFUA_2G12450 | Hydroxymethylglutaryl-CoA lyase (EC 4.1.3.4)                                                                                                                                                                      | 2.07 | 1.98  | 1.96  | 1.61E-05 |
| AFUA_4G06910 | Outer mitochondrial membrane protein porin                                                                                                                                                                        | 2.08 | 0.22  | 1.99  | 5.95E-07 |
| AFUA_3G13010 | Zn-dependent hydrolase/oxidoreductase family<br>protein, putative                                                                                                                                                 | 2.08 | -0.14 | -1.12 | 3.42E-03 |
| AFUA_1G16270 | Xylitol dehydrogenase XdhB (EC 1.1.1.14)                                                                                                                                                                          | 2.08 | 2.20  | 2.82  | 1.45E-03 |
| AFUA_5G03250 | Ubiquitin C-terminal hydrolase (HAUSP), putative<br>(EC 3.1.2.15)                                                                                                                                                 | 2.08 | 0.78  | 0.57  | 3.17E-05 |
| AFUA_2G09030 | Dipeptidyl-peptidase 5 (EC 3.4.14.-) (Dipeptidyl-<br>peptidase V) (DPP V) (DppV)                                                                                                                                  | 2.08 | 3.28  | 1.89  | 1.63E-07 |
| AFUA_5G08910 | 3-methylcrotonyl-CoA carboxylase subunit alpha<br>(MccA), putative (EC 6.4.1.4)                                                                                                                                   | 2.09 | 1.12  | 1.26  | 7.48E-06 |
| AFUA_5G06390 | Adenosine kinase, putative (EC 2.7.1.20)                                                                                                                                                                          | 2.09 | 1.25  | 3.06  | 2.24E-06 |
| AFUA_3G12690 | Uncharacterized protein                                                                                                                                                                                           | 2.09 | 2.55  | 2.09  | 4.39E-10 |
| AFUA_4G02840 | NmrA-like family protein, putative                                                                                                                                                                                | 2.09 | 1.42  | -0.34 | 2.28E-04 |
| AFUA_3G13320 | 40S ribosomal protein S0                                                                                                                                                                                          | 2.09 | 0.99  | 3.67  | 3.50E-07 |
| AFUA_3G03020 | Phosphoglucomutase, putative                                                                                                                                                                                      | 2.09 | 2.13  | 1.66  | 1.24E-04 |
| AFUA_6G08750 | Delta-1-pyrroline-5-carboxylate dehydrogenase PrnC<br>(EC 1.2.1.88)                                                                                                                                               | 2.10 | 1.56  | 1.26  | 3.94E-08 |
| AFUA_7G02550 | Probable D-xylulose reductase A (EC 1.1.1.9) (Xylitol<br>dehydrogenase A)                                                                                                                                         | 2.11 | 3.08  | 3.00  | 2.95E-08 |
| AFUA_2G10220 | Glycerol dehydrogenase, putative (EC 1.1.1.-)                                                                                                                                                                     | 2.11 | 1.89  | 1.74  | 2.26E-05 |
| AFUA_2G00967 | Cupin domain protein                                                                                                                                                                                              | 2.11 | 2.50  | 0.92  | 4.17E-03 |
| AFUA_1G05200 | Eukaryotic translation initiation factor 3 subunit A<br>(eIF3a) (Eukaryotic translation initiation factor 3 110<br>kDa subunit homolog) (eIF3 p110) (Translation<br>initiation factor eIF3, p110 subunit homolog) | 2.11 | 0.30  | 1.59  | 1.79E-03 |
| AFUA_5G09400 | Carbonyl reductase, putative (EC 1.-.-.-)                                                                                                                                                                         | 2.11 | 2.49  | 2.20  | 2.04E-04 |
| AFUA_6G11430 | Aldehyde dehydrogenase AldA, putative (EC 1.2.1.3)                                                                                                                                                                | 2.11 | 2.91  | 2.59  | 4.34E-10 |
| AFUA_4G06860 | Uncharacterized protein                                                                                                                                                                                           | 2.13 | 2.09  | 1.49  | 1.46E-04 |
| AFUA_1G08930 | Probable cytosolic iron-sulfur protein assembly<br>protein 1                                                                                                                                                      | 2.13 | 2.22  | 3.31  | 2.02E-03 |
| AFUA_7G05290 | 40S ribosomal protein S13                                                                                                                                                                                         | 2.13 | 1.40  | 4.21  | 4.71E-06 |
| AFUA_2G03380 | Alkaline serine protease                                                                                                                                                                                          | 2.14 | 1.37  | 4.85  | 1.02E-04 |
| AFUA_2G09090 | Prohibitin, putative                                                                                                                                                                                              | 2.14 | 0.81  | 2.15  | 1.23E-03 |
| AFUA_5G03520 | Uncharacterized protein                                                                                                                                                                                           | 2.15 | 2.36  | 2.43  | 6.41E-07 |
| AFUA_4G13700 | Threonyl-tRNA synthetase, putative (EC 6.1.1.3)                                                                                                                                                                   | 2.15 | 1.98  | 2.27  | 1.50E-05 |
| AFUA_2G17920 | Uncharacterized protein                                                                                                                                                                                           | 2.15 | 2.58  | 2.12  | 1.62E-06 |
| AFUA_4G13500 | Aldehyde dehydrogenase                                                                                                                                                                                            | 2.15 | 1.42  | 2.54  | 6.03E-05 |
| AFUA_3G06890 | RRM domain protein                                                                                                                                                                                                | 2.15 | 1.66  | 1.07  | 3.71E-04 |
| AFUA_5G02410 | ATP-dependent RNA helicase fall1 (EC 3.6.4.13)                                                                                                                                                                    | 2.16 | 0.34  | 2.42  | 8.11E-03 |
| AFUA_1G13790 | Histone H3                                                                                                                                                                                                        | 2.16 | 2.07  | 2.90  | 5.44E-05 |
| AFUA_6G02870 | Uncharacterized protein                                                                                                                                                                                           | 2.16 | 0.48  | 0.54  | 1.18E-03 |
| AFUA_3G13140 | Methyltransferase, putative                                                                                                                                                                                       | 2.16 | 2.14  | 2.09  | 1.35E-03 |
| AFUA_6G12720 | 40S ribosomal protein S29, putative                                                                                                                                                                               | 2.17 | 0.92  | 5.44  | 5.97E-06 |
| AFUA_8G04340 | Cystathionine gamma-lyase (EC 4.4.1.8)                                                                                                                                                                            | 2.17 | 1.72  | 2.46  | 1.22E-03 |
| AFUA_3G00320 | Endo-1,4-beta-xylanase xynf11a (Xylanase xynf11a)<br>(EC 3.2.1.8) (1,4-beta-D-xylan xylanohydrolase<br>xynf11a)                                                                                                   | 2.17 | 0.50  | 0.09  | 3.80E-05 |

|              |                                                                                         |      |      |       |          |
|--------------|-----------------------------------------------------------------------------------------|------|------|-------|----------|
| AFUA_2G12530 | Carnitine acetyl transferase                                                            | 2.17 | 2.17 | 2.24  | 1.23E-05 |
| AFUA_6G10480 | Peptidyl-prolyl cis-trans isomerase-like 3 (PPIase) (EC 5.2.1.8) (Rotamase)             | 2.18 | 1.64 | 2.28  | 4.96E-03 |
| AFUA_1G09230 | DUF1000 domain protein                                                                  | 2.18 | 1.93 | 2.15  | 2.28E-04 |
| AFUA_3G08660 | Isocitrate dehydrogenase [NADP] (EC 1.1.1.42)                                           | 2.19 | 1.60 | 1.11  | 2.02E-07 |
| AFUA_1G10780 | Aminomethyltransferase (EC 2.1.2.10) (Glycine cleavage system T protein)                | 2.19 | 3.06 | 2.90  | 4.94E-05 |
| AFUA_6G13410 | Pre-mRNA-splicing factor rse1                                                           | 2.20 | 2.89 | 2.76  | 1.49E-09 |
| AFUA_2G16200 | Uracil phosphoribosyltransferase (EC 2.4.2.9)                                           | 2.20 | 2.25 | 2.69  | 1.16E-02 |
| AFUA_2G00830 | Short chain dehydrogenase/reductase (EC 1.1.-.-)                                        | 2.20 | 1.98 | 1.66  | 3.87E-03 |
| AFUA_5G13450 | Triosephosphate isomerase (EC 5.3.1.1)                                                  | 2.20 | 2.15 | 1.85  | 1.15E-06 |
| AFUA_1G14090 | Histidinol-phosphate aminotransferase (EC 2.6.1.9)                                      | 2.20 | 1.47 | 2.98  | 3.93E-06 |
| AFUA_1G13500 | Transketolase (EC 2.2.1.1)                                                              | 2.21 | 3.24 | 3.23  | 5.10E-09 |
| AFUA_5G10610 | Ubiquinol-cytochrome c reductase iron-sulfur subunit (EC 1.10.2.2)                      | 2.21 | 2.19 | 2.15  | 3.15E-07 |
| AFUA_2G12180 | Lectin family integral membrane protein, putative                                       | 2.22 | 0.92 | 1.78  | 3.14E-02 |
| AFUA_3G12370 | V-type proton ATPase proteolipid subunit                                                | 2.23 | 0.44 | 0.62  | 1.65E-03 |
| AFUA_6G11210 | 3-oxoacyl-(Acyl-carrier-protein) reductase (EC 1.1.1.100)                               | 2.23 | 1.76 | 1.69  | 1.86E-05 |
| AFUA_5G08640 | Integral membrane protein                                                               | 2.24 | 1.16 | -0.60 | 2.10E-03 |
| AFUA_3G02240 | Aromatic-L-amino-acid decarboxylase, putative (EC 4.1.1.28)                             | 2.24 | 2.44 | 1.68  | 7.17E-05 |
| AFUA_6G11310 | Bifunctional pyrimidine biosynthesis protein (PyrABCN), putative (EC 6.3.5.5)           | 2.24 | 1.17 | 1.15  | 9.53E-06 |
| AFUA_4G06640 | Sphingomyelin phosphodiesterase                                                         | 2.24 | 0.35 | 0.26  | 3.36E-03 |
| AFUA_5G06500 | Acyl-CoA dehydrogenase family protein (EC 1.3.99.-)                                     | 2.25 | 1.85 | 1.96  | 8.24E-05 |
| AFUA_2G10660 | Mannitol-1-phosphate 5-dehydrogenase (MIPDH) (MPD) (MPDH) (EC 1.1.1.17)                 | 2.25 | 2.46 | 2.14  | 2.73E-08 |
| AFUA_1G14680 | DNA-directed RNA polymerase subunit (EC 2.7.7.6)                                        | 2.25 | 2.02 | 3.38  | 4.43E-05 |
| AFUA_3G00280 | Metallo-beta-lactamase domain protein, putative                                         | 2.26 | 3.78 | 3.75  | 5.18E-04 |
| AFUA_2G02920 | Alpha/beta hydrolase, putative (EC 3.-.-.-)                                             | 2.26 | 2.22 | 2.18  | 4.64E-05 |
| AFUA_6G02140 | Peptidyl-prolyl cis-trans isomerase-like 1 (PPIase) (EC 5.2.1.8) (Rotamase)             | 2.26 | 1.98 | 2.33  | 3.51E-03 |
| AFUA_4G04350 | DEAD helicases superfamily protein (Aquarius), putative                                 | 2.26 | 1.27 | 2.48  | 1.26E-02 |
| AFUA_6G12530 | Translation initiation factor eif-2b epsilon subunit, putative (EC 2.7.7.-)             | 2.26 | 0.53 | 2.64  | 1.72E-04 |
| AFUA_1G11120 | Uncharacterized protein                                                                 | 2.27 | 1.76 | 2.14  | 5.04E-03 |
| AFUA_1G10460 | Uncharacterized protein                                                                 | 2.27 | 1.93 | 1.73  | 9.81E-03 |
| AFUA_4G13760 | Uncharacterized protein                                                                 | 2.28 | 1.38 | 1.22  | 1.74E-02 |
| AFUA_2G05790 | Dolichyl-diphosphooligosaccharide--protein glycosyltransferase subunit 1 (EC 2.4.99.18) | 2.29 | 1.70 | 2.33  | 1.32E-09 |
| AFUA_6G03830 | Ribosomal protein L14                                                                   | 2.30 | 1.58 | 4.26  | 6.50E-08 |
| AFUA_1G11790 | Nucleoside hydrolase, putative (EC 3.2.2.-)                                             | 2.30 | 2.29 | 1.85  | 3.45E-03 |
| AFUA_1G12920 | Alpha-1,4 glucan phosphorylase (EC 2.4.1.1)                                             | 2.31 | 2.77 | 2.48  | 3.21E-07 |
| AFUA_1G11730 | ADP-ribosylation factor, putative                                                       | 2.32 | 0.94 | 2.02  | 3.18E-05 |
| AFUA_5G07170 | Nucleoside-diphosphate-sugar epimerase, putative                                        | 2.32 | 2.57 | 2.32  | 5.15E-03 |
| AFUA_6G14460 | Haloalkanoic acid dehalogenase, putative (EC 3.8.1.-)                                   | 2.32 | 2.41 | 1.77  | 6.44E-05 |
| AFUA_4G03140 | Serine protein kinase Sky1, putative (EC 2.7.1.-)                                       | 2.32 | 0.75 | 1.26  | 9.40E-03 |
| AFUA_1G04950 | Serine/threonine-protein phosphatase (EC 3.1.3.16)                                      | 2.33 | 1.62 | 1.22  | 3.67E-08 |
| AFUA_4G11840 | Glyoxylate reductase (EC 1.1.1.95)                                                      | 2.33 | 2.28 | 1.99  | 1.68E-04 |
| AFUA_7G05930 | Metallopeptidase MepB (EC 3.4.24.-)                                                     | 2.34 | 2.35 | 2.22  | 4.82E-07 |
| AFUA_5G03540 | Thioredoxin reductase, putative (EC 1.-.-.-)                                            | 2.34 | 1.20 | 0.36  | 2.53E-08 |
| AFUA_3G09320 | Serine hydroxymethyltransferase (EC 2.1.2.1)                                            | 2.34 | 3.63 | 2.46  | 2.26E-10 |
| AFUA_2G08370 | Glutathione S-transferase, putative (EC 2.5.1.-)                                        | 2.35 | 0.51 | 1.16  | 5.25E-04 |
| AFUA_5G08930 | Isovaleryl-CoA dehydrogenase IvdA, putative (EC 1.3.8.4)                                | 2.35 | 1.94 | 1.59  | 6.38E-07 |
| AFUA_1G01680 | Branched-chain amino acid aminotransferase (EC 2.6.1.42)                                | 2.36 | 1.53 | 1.12  | 2.97E-04 |
| AFUA_5G12210 | G protein complex beta subunit SfaD                                                     | 2.36 | 1.81 | 2.92  | 7.28E-07 |
| AFUA_2G03720 | Peptidyl-prolyl cis-trans isomerase (PPIase) (EC 5.2.1.8)                               | 2.37 | 2.56 | 2.42  | 3.59E-07 |
| AFUA_7G01920 | DNA-directed RNA polymerase subunit beta (EC 2.7.7.6)                                   | 2.37 | 1.88 | 2.91  | 1.36E-04 |
| AFUA_2G04220 | Homogentisate 1,2-dioxygenase (HmgA), putative (EC 1.13.11.5)                           | 2.37 | 2.00 | 1.07  | 3.81E-02 |

|              |                                                                                                                                                                          |      |       |       |          |
|--------------|--------------------------------------------------------------------------------------------------------------------------------------------------------------------------|------|-------|-------|----------|
| AFUA_1G09960 | Kynurenine formamidase (KFA) (KFase) (EC 3.5.1.9)<br>(Arylformamidase) (N-formylkynurenine<br>formamidase) (FKF)                                                         | 2.37 | 1.73  | 1.14  | 9.20E-03 |
| AFUA_5G08940 | 3-methylcrotonyl-CoA carboxylase, beta subunit<br>(MccB), putative (EC 6.4.1.3)                                                                                          | 2.37 | 1.48  | 1.54  | 3.45E-03 |
| AFUA_3G08640 | Eukaryotic translation initiation factor 3 subunit I<br>(eIF3i) (Eukaryotic translation initiation factor 3 39<br>kDa subunit homolog) (eIF-3 39 kDa subunit<br>homolog) | 2.38 | 1.42  | 2.53  | 2.45E-04 |
| AFUA_1G08760 | Delta-aminolevulinic acid dehydratase (EC 4.2.1.24)                                                                                                                      | 2.38 | 0.77  | 1.07  | 2.27E-02 |
| AFUA_5G07020 | Ribosome biogenesis ABC transporter Arb1, putative<br>(EC 3.6.3.-)                                                                                                       | 2.39 | 0.37  | 1.64  | 2.14E-02 |
| AFUA_5G03360 | NADH pyrophosphatase, putative (EC 3.6.1.-)                                                                                                                              | 2.39 | 1.95  | 2.29  | 1.45E-02 |
| AFUA_6G11620 | Formyltetrahydrofolate deformylase, putative (EC<br>3.5.1.10)                                                                                                            | 2.40 | 2.58  | 3.40  | 1.24E-06 |
| AFUA_2G08970 | Thiamine biosynthetic bifunctional enzyme, putative                                                                                                                      | 2.41 | 2.37  | 2.22  | 1.51E-05 |
| AFUA_1G01490 | NACHT domain protein                                                                                                                                                     | 2.42 | 1.20  | 2.02  | 5.24E-07 |
| AFUA_4G12870 | Methylmalonate-semialdehyde dehydrogenase,<br>putative (EC 1.2.1.27)                                                                                                     | 2.43 | 2.51  | 2.47  | 1.72E-06 |
| AFUA_6G07760 | Proteasome regulatory particle subunit (RpnG),<br>putative                                                                                                               | 2.46 | 1.02  | 2.61  | 2.81E-05 |
| AFUA_2G01040 | S-(hydroxymethyl)glutathione dehydrogenase (EC<br>1.1.1.284)                                                                                                             | 2.46 | 1.49  | 0.21  | 1.09E-09 |
| AFUA_3G06760 | 60S ribosomal protein L37                                                                                                                                                | 2.46 | 2.44  | 5.25  | 9.40E-06 |
| AFUA_6G11680 | Thiamine pyrophosphate enzyme, putative (EC 4.1.-.-)                                                                                                                     | 2.47 | 2.28  | 2.39  | 5.77E-05 |
| AFUA_1G11710 | Ribosomal protein                                                                                                                                                        | 2.47 | 0.57  | 2.72  | 2.45E-06 |
| AFUA_4G07190 | Ornithine carbamoyltransferase (EC 2.1.3.3)                                                                                                                              | 2.47 | 3.65  | 3.07  | 6.27E-08 |
| AFUA_1G11960 | Alternative NADH-dehydrogenase (EC 1.6.99.3)                                                                                                                             | 2.48 | 0.73  | 1.88  | 5.93E-06 |
| AFUA_2G02150 | 40S ribosomal protein S10a                                                                                                                                               | 2.48 | 0.92  | 3.06  | 1.80E-05 |
| AFUA_1G02090 | Quinone oxidoreductase, putative (EC 1.6.5.5)                                                                                                                            | 2.48 | 2.22  | 2.44  | 7.49E-06 |
| AFUA_4G09250 | Uncharacterized protein                                                                                                                                                  | 2.50 | 0.81  | 2.23  | 2.14E-04 |
| AFUA_3G04020 | Conserved mitochondrial protein                                                                                                                                          | 2.50 | 2.02  | 2.39  | 6.53E-04 |
| AFUA_2G07350 | Gamma-glutamyl phosphate reductase (EC 1.2.1.41)                                                                                                                         | 2.50 | 2.64  | 2.93  | 1.11E-04 |
| AFUA_5G08980 | NADH-ubiquinone oxidoreductase 9.5 kDa subunit,<br>putative (EC 1.6.5.3)                                                                                                 | 2.51 | 1.33  | 1.80  | 5.73E-03 |
| AFUA_4G10790 | Phosphoribosyl diphosphate synthase isoform 4                                                                                                                            | 2.51 | 1.61  | 3.04  | 1.23E-04 |
| AFUA_2G03980 | Alpha-1,3-glucanase/mutanase, putative (EC 3.2.1.-)                                                                                                                      | 2.51 | 0.30  | -0.40 | 5.32E-09 |
| AFUA_4G05900 | Uncharacterized protein                                                                                                                                                  | 2.52 | 0.96  | 1.98  | 3.18E-03 |
| AFUA_5G06010 | Eukaryotic translation initiation factor 6 (eIF-6)                                                                                                                       | 2.53 | 1.64  | 2.91  | 2.74E-04 |
| AFUA_3G12840 | Signal peptidase complex catalytic subunit sec11 (EC<br>3.4.21.89) (Signal peptidase I)                                                                                  | 2.53 | 1.13  | 1.83  | 1.78E-02 |
| AFUA_1G06390 | Elongation factor 1-alpha                                                                                                                                                | 2.55 | 0.67  | 1.62  | 2.21E-10 |
| AFUA_3G06070 | Histone H1                                                                                                                                                               | 2.55 | 2.66  | 3.86  | 1.66E-05 |
| AFUA_2G13860 | Histone H4                                                                                                                                                               | 2.56 | 2.36  | 2.68  | 1.57E-07 |
| AFUA_3G12100 | Trehalose synthase (Ccg-9), putative (EC 2.4.1.-)                                                                                                                        | 2.57 | 2.42  | 2.69  | 2.04E-05 |
| AFUA_1G10310 | RNase L inhibitor of the ABC superfamily, putative                                                                                                                       | 2.57 | 1.26  | 1.67  | 3.21E-03 |
| AFUA_6G10880 | Acyl-CoA dehydrogenase family protein (EC 1.3.99.-)                                                                                                                      | 2.58 | -0.22 | -1.17 | 2.02E-08 |
| AFUA_6G07770 | Alanine aminotransferase, putative (EC 2.6.1.-)                                                                                                                          | 2.58 | 2.69  | 2.13  | 3.86E-08 |
| AFUA_2G10300 | 40S ribosomal protein S17, putative                                                                                                                                      | 2.58 | 0.94  | 3.54  | 3.51E-05 |
| AFUA_4G07730 | 60S ribosomal protein L11                                                                                                                                                | 2.60 | 1.32  | 4.11  | 1.78E-06 |
| AFUA_5G01440 | Allergen, putative (EC 1.-.-)                                                                                                                                            | 2.60 | 2.66  | 2.59  | 2.39E-07 |
| AFUA_5G02030 | Cleavage and polyadenylation specific factor 5                                                                                                                           | 2.60 | 2.18  | 2.07  | 1.02E-06 |
| AFUA_5G08290 | Aldo-keto reductase, putative (EC 1.1.1.-)                                                                                                                               | 2.60 | 2.88  | 2.20  | 4.21E-05 |
| AFUA_5G01290 | Zinc-binding oxidoreductase, putative (EC 1.-.-)                                                                                                                         | 2.61 | 2.82  | 2.74  | 3.61E-04 |
| AFUA_3G08380 | Inorganic diphosphatase, putative (EC 3.6.1.1)                                                                                                                           | 2.61 | 2.82  | 2.44  | 1.92E-10 |
| AFUA_6G02860 | Isocitrate lyase (EC 4.1.3.1)                                                                                                                                            | 2.62 | 2.79  | 2.62  | 3.59E-07 |
| AFUA_3G10970 | Protein-tyrosine phosphatase 2 (EC 3.1.3.48)                                                                                                                             | 2.63 | 1.09  | 2.48  | 3.79E-02 |
| AFUA_1G03400 | Protein transport protein sec23                                                                                                                                          | 2.63 | 0.89  | 2.28  | 5.12E-05 |
| AFUA_5G02040 | Extracellular lipase, putative (EC 3.1.1.3)                                                                                                                              | 2.64 | 0.62  | -0.46 | 1.14E-06 |
| AFUA_3G07790 | Argininosuccinate lyase (EC 4.3.2.1)                                                                                                                                     | 2.64 | 2.47  | 2.26  | 6.17E-07 |
| AFUA_2G01920 | Glutamyl-tRNA synthetase (EC 6.1.1.18)                                                                                                                                   | 2.64 | 1.85  | 0.95  | 1.34E-05 |
| AFUA_5G11660 | Autophagy-related protein 18                                                                                                                                             | 2.64 | 2.18  | 2.57  | 1.54E-04 |
| AFUA_3G06960 | 60S ribosomal protein L21, putative                                                                                                                                      | 2.65 | 0.47  | 3.65  | 3.25E-05 |
| AFUA_2G05740 | Rho GTPase ModA, putative                                                                                                                                                | 2.65 | 1.95  | 2.38  | 1.24E-03 |

|              |                                                                                                                                                                  |      |      |       |          |
|--------------|------------------------------------------------------------------------------------------------------------------------------------------------------------------|------|------|-------|----------|
| AFUA_6G03730 | 2-methylcitrate dehydratase, putative (EC 4.2.1.79)                                                                                                              | 2.67 | 2.66 | 3.38  | 1.01E-06 |
| AFUA_1G04130 | FG-GAP repeat protein, putative                                                                                                                                  | 2.68 | 0.75 | -0.63 | 2.94E-06 |
| AFUA_6G13300 | GTP-binding nuclear protein                                                                                                                                      | 2.70 | 2.02 | 2.31  | 8.90E-06 |
| AFUA_7G00360 | UDP-galactose 4-epimerase, putative (EC 5.1.3.-)                                                                                                                 | 2.71 | 1.81 | 2.62  | 5.05E-08 |
| AFUA_4G06140 | Dipeptidyl peptidase 3 (EC 3.4.14.4) (Dipeptidyl aminopeptidase III) (Dipeptidyl peptidase III)                                                                  | 2.72 | 2.86 | 2.43  | 1.13E-06 |
| AFUA_4G07050 | L-lactate dehydrogenase (EC 1.13.12.4)                                                                                                                           | 2.73 | 2.66 | 2.52  | 2.06E-06 |
| AFUA_3G11280 | Class V chitinase, putative (EC 3.2.1.14)                                                                                                                        | 2.73 | 2.36 | 1.80  | 8.28E-08 |
| AFUA_2G02580 | HAD superfamily hydrolase, putative                                                                                                                              | 2.74 | 2.58 | 2.37  | 2.41E-05 |
| AFUA_2G02950 | Aldehyde reductase, putative (EC 1.1.1.-)                                                                                                                        | 2.75 | 2.40 | 1.93  | 5.49E-06 |
| AFUA_3G06970 | 40S ribosomal protein S9                                                                                                                                         | 2.75 | 0.77 | 3.13  | 2.34E-07 |
| AFUA_1G15860 | Coatomeer subunit delta, putative                                                                                                                                | 2.76 | 0.78 | 2.06  | 8.40E-04 |
| AFUA_3G02370 | Short-chain dehydrogenase/reductase, putative (EC 1.-.-.-)                                                                                                       | 2.77 | 2.92 | 3.87  | 7.65E-07 |
| AFUA_6G07710 | Mitochondrial dicarboxylate carrier protein, putative                                                                                                            | 2.77 | 2.44 | 2.24  | 4.59E-03 |
| AFUA_5G02300 | Peroxidase, putative (EC 1.11.1.-)                                                                                                                               | 2.77 | 1.19 | 1.51  | 2.77E-05 |
| AFUA_3G08310 | 4-nitrophenylphosphatase (PNPPase) (EC 3.1.3.41)                                                                                                                 | 2.77 | 2.04 | 1.39  | 1.34E-02 |
| AFUA_1G15450 | Adenylosuccinate synthetase (AMPSase) (AdSS) (EC 6.3.4.4) (IMP--aspartate ligase)                                                                                | 2.78 | 2.76 | 2.28  | 2.20E-10 |
| AFUA_4G10760 | Steroid alpha reductase family protein                                                                                                                           | 2.80 | 0.90 | 1.55  | 7.90E-06 |
| AFUA_4G08330 | Aspartyl-tRNA synthetase, putative (EC 6.1.1.12)                                                                                                                 | 2.81 | 2.80 | 3.60  | 1.77E-06 |
| AFUA_3G06880 | Sorting nexin-3                                                                                                                                                  | 2.81 | 2.58 | 3.46  | 3.16E-04 |
| AFUA_2G00590 | Glutathione S-transferase, putative (EC 2.5.1.18)                                                                                                                | 2.81 | 1.86 | 2.26  | 1.59E-03 |
| AFUA_6G07720 | Phosphoenolpyruvate carboxykinase AcuF (EC 4.1.1.49)                                                                                                             | 2.81 | 2.33 | 2.72  | 2.44E-07 |
| AFUA_8G04090 | Choline oxidase (CodA), putative (EC 1.1.3.17)                                                                                                                   | 2.82 | 2.36 | 2.08  | 1.64E-08 |
| AFUA_3G11350 | ATPase get3 (EC 3.6.-.-) (Arsenical pump-driving ATPase) (Arsenite-stimulated ATPase) (Golgi to ER traffic protein 3) (Guided entry of tail-anchored proteins 3) | 2.82 | 1.72 | 3.08  | 7.97E-03 |
| AFUA_2G04590 | Alcohol dehydrogenase, putative (EC 1.1.1.-)                                                                                                                     | 2.84 | 1.45 | 1.67  | 1.37E-04 |
| AFUA_8G04080 | Betaine aldehyde dehydrogenase (BadH), putative (EC 1.2.1.8)                                                                                                     | 2.84 | 3.00 | 2.50  | 1.85E-06 |
| AFUA_5G09860 | S-formylglutathione hydrolase (EC 3.1.2.12)                                                                                                                      | 2.85 | 2.31 | 2.46  | 8.48E-06 |
| AFUA_3G11690 | Fructose-bisphosphate aldolase, class II (EC 4.1.2.13)                                                                                                           | 2.85 | 2.74 | 2.40  | 1.96E-10 |
| AFUA_5G02350 | Hydrolase, carbon-nitrogen family, putative                                                                                                                      | 2.87 | 1.32 | 2.15  | 1.12E-02 |
| AFUA_2G04320 | NADH-dependent flavin oxidoreductase, putative (EC 1.-.-.-)                                                                                                      | 2.88 | 3.06 | 3.15  | 6.48E-11 |
| AFUA_2G04490 | D-3-phosphoglycerate dehydrogenase (EC 1.1.1.95)                                                                                                                 | 2.90 | 0.19 | 0.56  | 5.40E-03 |
| AFUA_8G01670 | Catalase-peroxidase (CP) (EC 1.11.1.21) (Catalase-2) (Peroxidase/catalase)                                                                                       | 2.91 | 2.01 | 1.41  | 4.44E-09 |
| AFUA_5G10560 | Cytochrome c oxidase subunit V                                                                                                                                   | 2.91 | 1.58 | 2.70  | 1.01E-06 |
| AFUA_5G03860 | Alkaline phosphatase family protein (EC 3.1.-.-)                                                                                                                 | 2.91 | 1.43 | 2.99  | 2.46E-03 |
| AFUA_7G01000 | Aldehyde dehydrogenase, putative (EC 1.2.1.3)                                                                                                                    | 2.92 | 2.41 | 2.24  | 6.42E-09 |
| AFUA_4G10240 | Small nuclear ribonucleoprotein SmD3, putative                                                                                                                   | 2.93 | 0.33 | 1.86  | 1.92E-03 |
| AFUA_7G02280 | U5 snRNP complex subunit, putative                                                                                                                               | 2.93 | 2.45 | 2.59  | 8.28E-03 |
| AFUA_4G08760 | Phospho-2-dehydro-3-deoxyheptonate aldolase (EC 2.5.1.54)                                                                                                        | 2.94 | 2.29 | 3.14  | 1.80E-05 |
| AFUA_3G12950 | FAD binding domain protein (EC 1.5.3.-)                                                                                                                          | 2.95 | 3.08 | 1.33  | 2.34E-02 |
| AFUA_1G06240 | Riboflavin synthase, alpha subunit (EC 2.5.1.9)                                                                                                                  | 2.97 | 2.97 | 2.47  | 1.10E-04 |
| AFUA_6G12950 | Trehalose-6-phosphate synthase (EC 2.4.1.15) (UDP-glucose-glucosephosphate glucosyltransferase)                                                                  | 3.01 | 1.98 | 3.52  | 7.43E-05 |
| AFUA_3G08430 | Mitochondrial phosphate carrier protein, putative                                                                                                                | 3.04 | 1.57 | 2.38  | 5.50E-03 |
| AFUA_2G13630 | Aromatic aminotransferase Aro8, putative (EC 2.6.1.-)                                                                                                            | 3.08 | 1.96 | 1.61  | 7.87E-04 |
| AFUA_2G06040 | Actin cortical patch component, putative                                                                                                                         | 3.11 | 3.03 | 2.43  | 5.46E-09 |
| AFUA_1G07010 | Phosphatidate cytidyltransferase (EC 2.7.7.41)                                                                                                                   | 3.12 | 0.81 | 2.44  | 1.15E-02 |
| AFUA_3G07430 | Peptidyl-prolyl cis-trans isomerase (PPIase) (EC 5.2.1.8)                                                                                                        | 3.12 | 3.35 | 2.98  | 9.92E-09 |
| AFUA_2G13295 | Aminotransferase family protein (LoIT), putative                                                                                                                 | 3.15 | 1.64 | 1.91  | 1.90E-03 |
| AFUA_5G08270 | HAD superfamily hydrolase, putative                                                                                                                              | 3.17 | 3.28 | 2.43  | 1.08E-07 |
| AFUA_4G07590 | CaaX prenyl protease Ste24 (EC 3.4.24.84)                                                                                                                        | 3.20 | 1.22 | 2.67  | 7.52E-04 |
| AFUA_7G05015 | Glyoxalase family protein                                                                                                                                        | 3.23 | 3.11 | 3.23  | 5.16E-06 |
| AFUA_5G04330 | Aminopeptidase (EC 3.4.11.-)                                                                                                                                     | 3.23 | 3.14 | 2.91  | 1.04E-09 |
| AFUA_6G02370 | Actin-related protein 2/3 complex subunit 4                                                                                                                      | 3.24 | 2.67 | 3.19  | 5.22E-06 |
| AFUA_6G10260 | Aldehyde reductase (AKR1), putative (EC 1.1.1.2)                                                                                                                 | 3.26 | 3.25 | 2.95  | 3.81E-11 |



|              |                                                                                                           |      |      |      |          |
|--------------|-----------------------------------------------------------------------------------------------------------|------|------|------|----------|
| AFUA_1G15610 | Oxidoreductase, zinc-binding dehydrogenase family, putative (EC 1.3.1.-)                                  | 3.27 | 3.06 | 3.36 | 9.47E-09 |
| AFUA_5G03330 | HypA-like protein, putative                                                                               | 3.28 | 2.78 | 3.08 | 2.01E-05 |
| AFUA_3G12510 | Vesicular fusion ATPase, putative                                                                         | 3.29 | 1.34 | 1.38 | 5.57E-05 |
| AFUA_2G17070 | Defective in cullin neddylation protein                                                                   | 3.34 | 2.92 | 2.04 | 2.08E-03 |
| AFUA_1G02570 | Aspartyl-tRNA synthetase, cytoplasmic (EC 6.1.1.12)                                                       | 3.37 | 1.41 | 2.82 | 2.34E-05 |
| AFUA_4G05870 | Oxidoreductase, short-chain dehydrogenase/reductase family                                                | 3.37 | 3.29 | 2.83 | 6.10E-06 |
| AFUA_5G13510 | Cell cycle control protein (Cwf8), putative                                                               | 3.40 | 2.49 | 2.22 | 1.58E-06 |
| AFUA_3G00680 | Amine oxidase (EC 1.4.3.-)                                                                                | 3.44 | 1.35 | 1.88 | 1.22E-03 |
| AFUA_1G09660 | Mitochondrial 2-oxodicarboxylate carrier protein, putative                                                | 3.45 | 1.64 | 2.72 | 2.28E-05 |
| AFUA_4G07150 | Cytochrome c subunit, putative                                                                            | 3.45 | 2.41 | 2.78 | 1.10E-06 |
| AFUA_2G14850 | Enoyl-CoA hydratase/isomerase family protein (EC 4.2.-.-)                                                 | 3.46 | 2.02 | 2.40 | 1.40E-04 |
| AFUA_7G04180 | Amine oxidase (EC 1.4.3.-)                                                                                | 3.46 | 2.15 | 1.42 | 5.87E-08 |
| AFUA_6G14100 | Mitochondrial carnitine:acyl carnitine carrier, putative                                                  | 3.46 | 2.04 | 2.78 | 2.40E-04 |
| AFUA_1G04720 | C-8 sterol isomerase (Erg-1), putative                                                                    | 3.48 | 1.57 | 1.64 | 3.80E-04 |
| AFUA_6G13440 | Choline sulfatase, putative (EC 3.1.6.6)                                                                  | 3.50 | 1.09 | 2.07 | 9.70E-04 |
| AFUA_2G09790 | Glucose-6-phosphate isomerase (EC 5.3.1.9)                                                                | 3.53 | 3.67 | 3.45 | 1.95E-08 |
| AFUA_8G00620 | Dimethylallyl tryptophan synthase, putative (EC 2.5.1.-)                                                  | 3.57 | 0.95 | 0.59 | 4.77E-03 |
| AFUA_6G00770 | Probable arabinan endo-1,5-alpha-L-arabinosidase C (EC 3.2.1.99) (Endo-1,5-alpha-L-arabinanase C) (ABN C) | 3.60 | 3.10 | 2.44 | 3.91E-04 |
| AFUA_1G06700 | Metacaspase-1A (EC 3.4.22.-)                                                                              | 3.64 | 2.10 | 2.07 | 1.94E-03 |
| AFUA_1G10150 | Uncharacterized protein                                                                                   | 3.69 | 2.92 | 3.83 | 2.18E-05 |
| AFUA_3G14690 | Aminotransferase, putative (EC 2.-.-.-)                                                                   | 3.71 | 1.68 | 2.25 | 1.24E-02 |
| AFUA_4G10920 | Uncharacterized protein                                                                                   | 3.76 | 2.69 | 2.97 | 4.54E-05 |
| AFUA_1G12250 | Mitochondrial hypoxia responsive domain protein                                                           | 3.82 | 1.09 | 1.94 | 2.25E-02 |
| AFUA_3G14270 | Aldo-keto reductase (AKR), putative (EC 1.1.1.-)                                                          | 3.85 | 3.37 | 3.39 | 1.19E-04 |
| AFUA_5G09680 | Succinate dehydrogenase cytochrome b560 subunit (EC 1.3.5.1)                                              | 4.04 | 2.82 | 3.57 | 1.28E-05 |
| AFUA_4G13750 | Neutral protease 2 homolog AFUA_4G13750 (EC 3.4.24.39) (Deuterolysin AFUA_4G13750)                        | 4.36 | 2.08 | 0.81 | 5.27E-05 |
| AFUA_6G02450 | 40S ribosomal protein S30                                                                                 | 4.38 | 2.31 | 6.33 | 5.94E-10 |
| AFUA_8G00430 | Uncharacterized protein                                                                                   | 4.49 | 2.93 | 1.05 | 9.95E-07 |
| AFUA_5G02640 | O-methyltransferase, putative (EC 2.1.1.-)                                                                | 4.70 | 1.45 | 0.38 | 1.42E-07 |
| AFUA_6G12870 | Iron-sulfur clusters transporter atm1, mitochondrial                                                      | 4.78 | 2.84 | 4.54 | 4.29E-04 |

Differentially expressed proteins in ISSFT-021

| Gene         | Protein names                                                                            | Relative protein abundance* |           |          | P-value  |
|--------------|------------------------------------------------------------------------------------------|-----------------------------|-----------|----------|----------|
|              |                                                                                          | CEA10                       | ISSFT-021 | IF1SW-F4 |          |
| AFUA_5G14210 | Glucose repressible protein Grg1, putative                                               | -3.21                       | -7.14     | -4.80    | 1.87E-07 |
| AFUA_4G09600 | GPI anchored protein, putative                                                           | -3.43                       | -6.26     | -5.82    | 1.33E-07 |
| AFUA_4G14205 | Uncharacterized protein                                                                  | -3.49                       | -6.22     | -4.43    | 9.36E-06 |
| AFUA_1G13550 | Uncharacterized protein                                                                  | -3.59                       | -6.12     | -5.23    | 5.82E-03 |
| AFUA_5G13100 | Uncharacterized protein                                                                  | -3.50                       | -5.95     | -5.15    | 9.50E-09 |
| AFUA_6G12450 | Chaperone/heat shock protein Hsp12, putative                                             | -4.05                       | -5.81     | -5.12    | 5.46E-05 |
| AFUA_3G05430 | ATP-dependent RNA helicase dhh1 (EC 3.6.4.13)                                            | -2.86                       | -5.81     | -4.16    | 7.98E-04 |
| AFUA_2G03390 | Histone deacetylase (EC 3.5.1.98)                                                        | -4.27                       | -5.76     | -3.78    | 1.15E-03 |
| AFUA_1G10550 | CBF/NF-Y family transcription factor, putative                                           | -4.29                       | -5.75     | -3.37    | 3.43E-06 |
| AFUA_2G10020 | Uncharacterized protein                                                                  | -3.67                       | -5.69     | -3.86    | 3.03E-07 |
| AFUA_4G00860 | Cell surface protein, putative                                                           | -3.54                       | -5.64     | -4.62    | 1.37E-07 |
| AFUA_6G13500 | Uncharacterized protein                                                                  | -3.21                       | -5.61     | -3.77    | 7.19E-07 |
| AFUA_2G14330 | Uncharacterized protein                                                                  | -3.51                       | -5.48     | -6.27    | 2.39E-06 |
| AFUA_2G15810 | Uncharacterized protein                                                                  | -2.96                       | -5.32     | -5.18    | 3.13E-03 |
| AFUA_7G04930 | Alkaline serine protease (PR1)/allergen F18-like (EC 3.4.21.-)                           | -3.63                       | -5.32     | -5.53    | 1.14E-06 |
| AFUA_6G13670 | Reticulon-like protein                                                                   | -3.69                       | -5.29     | -2.62    | 3.96E-08 |
| AFUA_3G05570 | Spindle poison sensitivity protein Scp3, putative                                        | -2.94                       | -5.28     | -4.83    | 4.20E-04 |
| AFUA_1G17370 | Heat shock protein Awh11, putative                                                       | -2.95                       | -5.23     | -4.26    | 4.25E-07 |
| AFUA_4G08960 | GPI anchored cell wall protein, putative                                                 | -3.69                       | -5.18     | -5.37    | 8.40E-05 |
| AFUA_3G14260 | Mismatched base pair and cruciform DNA recognition protein, putative                     | -3.27                       | -5.16     | -3.37    | 2.05E-06 |
| AFUA_7G01340 | RPEL repeat protein                                                                      | -3.36                       | -5.15     | -5.55    | 4.07E-10 |
| AFUA_1G13560 | Uncharacterized protein                                                                  | -3.23                       | -5.10     | -3.77    | 1.79E-06 |
| AFUA_6G12000 | Uncharacterized protein                                                                  | -3.87                       | -5.08     | -3.22    | 6.46E-06 |
| AFUA_7G04520 | Uncharacterized protein                                                                  | -3.31                       | -5.06     | -4.87    | 1.19E-05 |
| AFUA_6G10700 | Chaperonin, putative                                                                     | -3.60                       | -4.94     | -3.42    | 8.19E-05 |
| AFUA_6G09120 | Uncharacterized protein                                                                  | -3.52                       | -4.91     | -2.97    | 1.10E-05 |
| AFUA_3G10410 | Conserved serine-rich protein                                                            | -2.82                       | -4.81     | -3.94    | 3.68E-05 |
| AFUA_6G03210 | Conidiation-specific protein (Con-10), putative                                          | -2.13                       | -4.73     | -3.82    | 3.46E-04 |
| AFUA_7G04030 | Uncharacterized protein                                                                  | -3.36                       | -4.62     | -2.54    | 1.06E-04 |
| AFUA_3G14540 | Heat shock protein Hsp30/Hsp42, putative                                                 | -3.73                       | -4.52     | -4.20    | 3.63E-08 |
| AFUA_4G12490 | Guanine nucleotide exchange factor Vps9, putative                                        | -2.86                       | -4.52     | -3.77    | 1.66E-04 |
| AFUA_2G03790 | Oxysterol binding protein (Osh7), putative                                               | -3.18                       | -4.47     | -2.85    | 8.13E-03 |
| AFUA_7G01200 | Aspergillopepsin, putative (EC 3.4.23.-)                                                 | -3.45                       | -4.45     | -2.66    | 8.43E-07 |
| AFUA_4G02805 | Asp hemolysin-like protein                                                               | -3.31                       | -4.42     | -2.02    | 7.88E-05 |
| AFUA_1G12070 | Glycine cleavage system H protein                                                        | -3.95                       | -4.38     | -4.79    | 8.05E-05 |
| AFUA_3G13850 | LRP16 family protein                                                                     | -2.27                       | -4.37     | -4.88    | 1.16E-03 |
| AFUA_7G04950 | Lipase, putative (EC 3.1.1.-)                                                            | -2.28                       | -4.33     | -0.49    | 1.12E-06 |
| AFUA_4G06820 | Protein ecm33                                                                            | -3.26                       | -4.32     | -3.59    | 5.49E-10 |
| AFUA_6G04390 | E3 ubiquitin-protein ligase bre1 (EC 2.3.2.27) (RING-type E3 ubiquitin transferase bre1) | -3.76                       | -4.23     | -4.24    | 8.60E-05 |
| AFUA_4G09740 | T-complex protein 1, theta subunit, putative                                             | -2.71                       | -4.22     | -2.49    | 2.19E-07 |
| AFUA_2G07600 | SRP receptor beta subunit (Srp102), putative                                             | -2.01                       | -4.19     | -2.72    | 3.98E-03 |
| AFUA_2G05635 | Uncharacterized protein                                                                  | -2.73                       | -4.18     | -4.06    | 4.08E-03 |
| AFUA_1G03710 | C2H2 finger domain protein, putative                                                     | -4.02                       | -4.17     | -3.69    | 7.80E-03 |
| AFUA_2G13040 | GrpE protein homolog                                                                     | -3.48                       | -4.15     | -3.01    | 2.23E-08 |
| AFUA_3G10920 | Telomere and ribosome associated protein Stm1, putative                                  | -3.30                       | -4.13     | -2.02    | 1.67E-07 |
| AFUA_4G09750 | 50S ribosomal protein L12                                                                | -3.36                       | -4.10     | -3.30    | 9.15E-05 |
| AFUA_2G15070 | 26S proteasome regulatory subunit S5A                                                    | -2.59                       | -4.07     | -3.12    | 8.53E-06 |
| AFUA_1G01950 | Uncharacterized protein                                                                  | -3.62                       | -4.06     | -3.24    | 4.23E-04 |
| AFUA_5G02420 | Splicing factor 3a subunit 3, putative                                                   | -2.70                       | -4.03     | -2.28    | 1.60E-02 |
| AFUA_8G01980 | Uncharacterized protein                                                                  | -3.27                       | -4.01     | -3.02    | 3.84E-06 |
| AFUA_2G01540 | Uncharacterized protein                                                                  | -3.19                       | -3.99     | -2.73    | 1.21E-05 |
| AFUA_8G04310 | Uncharacterized protein                                                                  | -2.55                       | -3.87     | -2.86    | 2.62E-03 |
| AFUA_2G10810 | Nuclear protein export protein Yrb2, putative                                            | -3.67                       | -3.85     | -2.59    | 3.31E-02 |
| AFUA_2G03010 | Cytochrome c subunit Vb, putative                                                        | -2.09                       | -3.83     | -3.13    | 8.44E-07 |
| AFUA_2G14490 | Endoglucanase, putative (EC 3.2.1.-)                                                     | -2.17                       | -3.83     | -3.33    | 1.17E-04 |
| AFUA_1G13530 | Uncharacterized protein                                                                  | -4.30                       | -3.82     | -2.75    | 3.15E-04 |
| AFUA_1G09030 | Uncharacterized protein                                                                  | -2.72                       | -3.81     | -1.86    | 4.70E-07 |

|              |                                                                            |       |       |       |          |
|--------------|----------------------------------------------------------------------------|-------|-------|-------|----------|
| AFUA_3G09030 | Regulatory protein SUAPRGA1                                                | -2.83 | -3.80 | -3.30 | 3.56E-03 |
| AFUA_1G04470 | Mitochondrial import inner membrane translocase subunit tim10              | -1.92 | -3.78 | -2.26 | 1.15E-03 |
| AFUA_6G09740 | Thioredoxin reductase gliT (EC 1.8.1.-) (Gliotoxin biosynthesis protein T) | -3.30 | -3.75 | -4.59 | 9.90E-08 |
| AFUA_3G02340 | CBF/NF-Y family transcription factor, putative                             | -2.41 | -3.75 | -2.28 | 4.63E-04 |
| AFUA_5G09380 | Uncharacterized protein                                                    | -2.31 | -3.71 | -2.68 | 1.67E-03 |
| AFUA_1G08880 | Iron/copper transporter Atx1, putative                                     | -3.41 | -3.69 | -2.06 | 9.37E-11 |
| AFUA_1G15010 | AMP binding domain protein, putative                                       | -4.47 | -3.65 | -3.15 | 2.42E-03 |
| AFUA_6G05350 | Probable aspartic-type endopeptidase opsB (EC 3.4.23.-)                    | -3.15 | -3.64 | -1.88 | 7.65E-06 |
| AFUA_1G06830 | 60S acidic ribosomal protein P1 (AfP1)                                     | -3.67 | -3.62 | -1.95 | 2.73E-05 |
| AFUA_2G16020 | T-complex protein 1, alpha subunit, putative                               | -1.91 | -3.60 | -1.79 | 1.56E-02 |
| AFUA_7G04210 | Tropomyosin, putative                                                      | -2.91 | -3.60 | -2.17 | 6.38E-06 |
| AFUA_2G05540 | Pre-mRNA-splicing factor cef1                                              | -2.16 | -3.57 | -3.66 | 5.22E-03 |
| AFUA_2G11840 | Transcriptional corepressor Cyc8, putative                                 | -3.28 | -3.54 | -2.12 | 4.54E-06 |
| AFUA_3G12790 | Conserved glutamic acid-rich protein                                       | -3.32 | -3.53 | -3.82 | 1.63E-04 |
| AFUA_3G10610 | Uncharacterized protein                                                    | -3.33 | -3.48 | -3.28 | 7.75E-04 |
| AFUA_7G04920 | Uncharacterized protein                                                    | -2.28 | -3.48 | -3.20 | 3.66E-02 |
| AFUA_5G10550 | ATP synthase subunit beta (EC 3.6.3.14)                                    | -2.85 | -3.44 | -1.63 | 9.29E-07 |
| AFUA_1G03580 | Uncharacterized protein                                                    | -2.87 | -3.41 | -3.86 | 1.07E-03 |
| AFUA_6G02260 | Uncharacterized protein                                                    | -3.21 | -3.41 | -2.20 | 1.03E-05 |
| AFUA_2G11740 | Lon protease homolog, mitochondrial (EC 3.4.21.53)                         | -2.25 | -3.40 | -2.33 | 9.12E-05 |
| AFUA_3G09990 | Uncharacterized protein                                                    | -2.59 | -3.39 | -2.84 | 4.40E-04 |
| AFUA_7G02020 | Uncharacterized protein                                                    | -2.67 | -3.38 | -2.69 | 3.83E-05 |
| AFUA_8G05650 | Uncharacterized protein                                                    | -2.35 | -3.36 | -3.61 | 2.53E-03 |
| AFUA_6G08660 | M protein repeat protein                                                   | -3.12 | -3.33 | -2.87 | 4.62E-05 |
| AFUA_2G08640 | Uncharacterized protein                                                    | -3.54 | -3.32 | -2.18 | 4.06E-04 |
| AFUA_4G10020 | Clathrin light chain                                                       | -3.70 | -3.30 | -2.33 | 1.95E-06 |
| AFUA_5G11390 | APSES transcription factor, putative                                       | -3.22 | -3.30 | -1.63 | 3.38E-04 |
| AFUA_2G03590 | 40S ribosomal protein S21                                                  | -3.07 | -3.22 | 0.19  | 2.54E-06 |
| AFUA_8G04270 | AAA family ATPase, putative                                                | -2.48 | -3.22 | -2.58 | 4.41E-04 |
| AFUA_5G02750 | Cytochrome c oxidase subunit Va, putative                                  | -1.79 | -3.20 | -2.26 | 3.37E-07 |
| AFUA_7G05270 | COMPASS complex subunit Sdc1, putative                                     | -3.87 | -3.18 | -2.60 | 3.89E-03 |
| AFUA_1G12390 | G2/M phase checkpoint control protein Sum2, putative                       | -2.58 | -3.14 | -1.76 | 3.72E-05 |
| AFUA_4G10150 | Alpha-glucosidase AgdA, putative (EC 3.2.1.20)                             | -2.96 | -3.13 | -3.34 | 5.33E-05 |
| AFUA_3G08230 | MRS7 family protein                                                        | -2.97 | -3.12 | -1.63 | 4.35E-04 |
| AFUA_5G12180 | Ran-specific GTPase-activating protein 1, putative                         | -3.75 | -3.12 | -3.01 | 9.69E-08 |
| AFUA_1G13670 | Uncharacterized protein                                                    | -3.36 | -3.10 | -2.85 | 4.02E-08 |
| AFUA_4G10280 | Phosphotransmitter protein Ypd1, putative                                  | -3.40 | -3.09 | -2.65 | 1.54E-06 |
| AFUA_6G08320 | Uncharacterized protein                                                    | -2.49 | -3.08 | -2.11 | 1.21E-07 |
| AFUA_2G02320 | Hsp70 chaperone (BiP), putative                                            | -2.06 | -3.07 | -2.16 | 3.26E-05 |
| AFUA_1G09250 | CUE domain protein, putative                                               | -2.03 | -3.06 | -2.38 | 4.12E-02 |
| AFUA_4G03420 | L-PSP endoribonuclease family protein, putative                            | -2.35 | -2.93 | -1.93 | 1.30E-03 |
| AFUA_1G01812 | MFS transporter, putative                                                  | -4.17 | -2.93 | -2.20 | 4.25E-03 |
| AFUA_6G12290 | PH domain protein                                                          | -2.32 | -2.92 | -2.73 | 1.83E-04 |
| AFUA_3G07870 | Extracellular serine-rich protein, putative                                | -1.73 | -2.89 | -3.23 | 1.27E-06 |
| AFUA_6G04690 | Uncharacterized protein                                                    | -2.96 | -2.89 | -2.57 | 8.64E-03 |
| AFUA_4G09580 | Major allergen Asp f 2 (Allergen Asp f II) (allergen Asp f 2)              | -2.12 | -2.88 | -2.68 | 1.20E-03 |
| AFUA_4G03780 | Probable rhamnogalacturonate lyase A (EC 4.2.2.23)                         | -1.78 | -2.88 | -2.67 | 2.33E-02 |
| AFUA_2G10030 | Actin cytoskeleton protein (VIP1), putative                                | -2.32 | -2.87 | -1.72 | 1.19E-09 |
| AFUA_6G06670 | Uncharacterized protein                                                    | -2.65 | -2.85 | -2.68 | 5.35E-05 |
| AFUA_2G08540 | DNA-directed RNA polymerase subunit                                        | -2.19 | -2.84 | -1.80 | 1.46E-05 |
| AFUA_2G08670 | Acetyl-CoA carboxylase                                                     | -2.01 | -2.80 | -1.74 | 3.47E-02 |
| AFUA_1G09280 | Protein phosphatase 2C, putative (EC 3.1.3.16)                             | -2.66 | -2.78 | -1.51 | 2.23E-03 |
| AFUA_5G12590 | Solid-state culture expressed protein (Aos23), putative                    | -3.38 | -2.76 | -3.75 | 2.32E-03 |
| AFUA_3G11550 | LEA domain protein                                                         | -3.34 | -2.74 | -2.50 | 2.51E-06 |
| AFUA_1G15780 | 3-isopropylmalate dehydrogenase (EC 1.1.1.85)                              | -1.67 | -2.72 | -2.26 | 5.25E-09 |
| AFUA_8G04920 | LEA domain protein                                                         | -2.00 | -2.70 | -2.54 | 4.55E-04 |
| AFUA_4G08030 | MICOS complex subunit mic60 (Mitofilin)                                    | -1.95 | -2.68 | -1.76 | 2.21E-02 |

|              |                                                                                  |       |       |       |          |
|--------------|----------------------------------------------------------------------------------|-------|-------|-------|----------|
| AFUA_2G10100 | 60S acidic ribosomal protein P2 (Afp2) (allergen Asp f 8)                        | -3.24 | -2.65 | -2.04 | 1.16E-06 |
| AFUA_2G11860 | Uncharacterized protein                                                          | -2.13 | -2.64 | -2.05 | 1.13E-06 |
| AFUA_4G11390 | Ubiquinol-cytochrome c reductase complex 17 kd protein                           | -1.72 | -2.64 | -2.94 | 3.97E-08 |
| AFUA_6G02830 | Uncharacterized protein                                                          | -4.08 | -2.59 | -1.87 | 6.97E-04 |
| AFUA_4G09280 | Uncharacterized protein                                                          | -2.55 | -2.57 | -1.65 | 1.51E-06 |
| AFUA_3G13430 | Uncharacterized protein                                                          | -2.63 | -2.56 | -3.12 | 2.45E-02 |
| AFUA_6G04610 | DNA-directed RNA polymerase I and III 14 kDa polypeptide                         | -2.32 | -2.56 | -1.91 | 1.48E-02 |
| AFUA_6G13120 | Filament-forming protein (Tpr/p270), putative                                    | -2.42 | -2.55 | -1.72 | 5.43E-07 |
| AFUA_2G07950 | ATP dependent RNA helicase, putative                                             | -2.84 | -2.54 | -2.06 | 4.88E-04 |
| AFUA_2G15290 | DUF636 domain protein                                                            | -2.54 | -2.53 | 0.18  | 8.12E-06 |
| AFUA_7G05610 | Glucanase, putative (EC 3.2.1.-)                                                 | -1.47 | -2.53 | -2.26 | 1.18E-04 |
| AFUA_3G09870 | Uncharacterized protein                                                          | -1.85 | -2.52 | -2.36 | 9.93E-03 |
| AFUA_3G10340 | Rho GTPase Rho 2, putative                                                       | -0.96 | -2.51 | -2.14 | 2.12E-03 |
| AFUA_7G02340 | L-PSP endoribonuclease family protein (Hmf1), putative                           | -3.47 | -2.50 | -2.31 | 2.66E-06 |
| AFUA_2G13310 | RING finger domain protein, putative                                             | 0.82  | -2.49 | -1.61 | 4.25E-03 |
| AFUA_5G10240 | Uncharacterized protein                                                          | -2.14 | -2.48 | -1.96 | 4.17E-04 |
| AFUA_2G13380 | GATA transcription factor (AreB), putative                                       | -2.97 | -2.48 | -2.78 | 4.61E-03 |
| AFUA_3G10190 | Peroxisomal membrane anchor protein (Pex14), putative                            | -2.34 | -2.48 | -3.06 | 2.78E-03 |
| AFUA_7G02170 | Peptidyl-prolyl cis-trans isomerase-like 4 (PPIase) (EC 5.2.1.8) (Rotamase)      | -2.38 | -2.47 | -1.41 | 4.54E-02 |
| AFUA_4G11110 | C2 domain protein                                                                | -2.90 | -2.46 | -1.53 | 7.18E-05 |
| AFUA_1G16840 | Translationally-controlled tumor protein homolog (TCTP)                          | -3.18 | -2.43 | -1.94 | 1.32E-06 |
| AFUA_1G12590 | RNA-binding La domain protein                                                    | -2.34 | -2.41 | -2.04 | 2.24E-03 |
| AFUA_3G11740 | RNAPII degradation factor Def1, putative                                         | -1.40 | -2.40 | -1.63 | 1.23E-02 |
| AFUA_1G11870 | Mitochondrial processing peptidase alpha subunit, putative (EC 3.4.24.64)        | -1.96 | -2.37 | -1.88 | 1.36E-02 |
| AFUA_4G04318 | Copper resistance protein Crd2, putative                                         | -1.49 | -2.35 | -2.86 | 1.30E-07 |
| AFUA_2G12190 | Mitochondrial import inner membrane translocase subunit tim13                    | -2.36 | -2.32 | -1.49 | 2.80E-03 |
| AFUA_2G17540 | Multicopper oxidase abr1 (EC 1.-.-) (Conidial pigment biosynthesis oxidase abr1) | -1.23 | -2.30 | -1.71 | 2.97E-04 |
| AFUA_1G11640 | Cytosolic Cu/Zn superoxide dismutase, putative                                   | -3.95 | -2.30 | -3.07 | 3.00E-06 |
| AFUA_5G04160 | NTF2 and RRM domain protein                                                      | -2.21 | -2.29 | -1.29 | 2.29E-03 |
| AFUA_2G10600 | NADH-ubiquinone oxidoreductase 299 kDa subunit, putative (EC 1.6.5.3)            | -2.11 | -2.28 | -1.33 | 2.39E-07 |
| AFUA_4G03322 | WW domain protein                                                                | -0.34 | -2.27 | -2.52 | 5.11E-03 |
| AFUA_2G10320 | SH3 domain protein                                                               | -2.98 | -2.27 | -2.08 | 2.01E-03 |
| AFUA_8G04570 | PWWP domain protein                                                              | -2.20 | -2.26 | -1.89 | 4.06E-07 |
| AFUA_2G17470 | L-PSP endoribonuclease family protein, putative                                  | 0.01  | -2.24 | -2.03 | 2.01E-03 |
| AFUA_7G02570 | NIMA-interacting protein TinC                                                    | -2.34 | -2.21 | -1.85 | 1.13E-03 |
| AFUA_2G14670 | Eukaryotic translation initiation factor 3 subunit D (eIF3d)                     | -1.59 | -2.17 | -1.62 | 2.36E-02 |
| AFUA_1G06170 | Proteasome regulatory particle subunit Rpt5, putative                            | -1.96 | -2.16 | -0.64 | 2.13E-03 |
| AFUA_8G07130 | AhpC/TSA family thioredoxin peroxidase, putative                                 | -2.06 | -2.15 | 0.17  | 1.13E-05 |
| AFUA_8G00550 | Methyltransferase psoC (EC 2.1.1.-) (Pseurotin biosynthesis protein C)           | -2.78 | -2.15 | -2.19 | 2.53E-08 |
| AFUA_8G06970 | Beta-glucosidase (EC 3.2.1.21)                                                   | -2.14 | -2.14 | -1.45 | 1.78E-02 |
| AFUA_1G07280 | Uncharacterized protein                                                          | -2.60 | -2.14 | -0.97 | 1.21E-05 |
| AFUA_6G03820 | Nascent polypeptide-associated complex subunit alpha (NAC-alpha) (Alpha-NAC)     | -2.01 | -2.13 | -0.86 | 4.66E-06 |
| AFUA_5G07240 | SAP domain protein                                                               | -1.84 | -2.11 | -2.42 | 1.82E-03 |
| AFUA_5G10920 | DUF221 domain protein, putative                                                  | -1.38 | -2.08 | -0.85 | 4.09E-02 |
| AFUA_4G12450 | Conserved lysine-rich protein, putative                                          | -2.94 | -2.01 | -0.91 | 1.88E-07 |
| AFUA_4G06670 | Allergen Asp f 7 (allergen Asp f 7)                                              | -3.09 | -1.97 | -1.95 | 2.08E-03 |
| AFUA_7G00580 | Uncharacterized protein                                                          | -2.04 | -1.96 | -2.49 | 3.96E-07 |
| AFUA_7G05470 | Electron transfer flavoprotein alpha subunit, putative                           | -2.00 | -1.96 | -2.30 | 2.77E-03 |
| AFUA_8G05570 | Transcription factor (Sin3), putative                                            | -1.43 | -1.95 | -1.13 | 5.73E-05 |
| AFUA_3G08880 | Uncharacterized protein                                                          | -1.51 | -1.94 | -1.23 | 4.76E-05 |
| AFUA_1G17310 | MFS lactose permease, putative                                                   | -2.01 | -1.93 | -1.04 | 3.30E-05 |
| AFUA_8G07060 | Hydrophobin, putative                                                            | -2.23 | -1.93 | -2.21 | 1.08E-07 |

|              |                                                                                                                                      |       |       |       |          |
|--------------|--------------------------------------------------------------------------------------------------------------------------------------|-------|-------|-------|----------|
| AFUA_6G12430 | Ran-interacting protein Mog1, putative                                                                                               | -2.45 | -1.91 | -0.83 | 9.45E-04 |
| AFUA_7G05450 | Secreted beta-glucosidase sun1 (EC 3.2.1.-)                                                                                          | -0.61 | -1.87 | -2.15 | 4.13E-02 |
| AFUA_7G06010 | Uncharacterized protein                                                                                                              | -2.81 | -1.84 | -1.57 | 3.36E-04 |
| AFUA_2G03500 | Sugar transporter, putative                                                                                                          | -0.06 | -1.81 | -0.75 | 4.20E-02 |
| AFUA_1G09890 | Uncharacterized protein                                                                                                              | -1.49 | -1.80 | -1.53 | 3.17E-03 |
| AFUA_3G07520 | Exo-beta-1,3-glucanase, putative (EC 3.2.1.58)                                                                                       | -0.11 | -1.80 | -0.86 | 5.26E-06 |
| AFUA_2G13590 | Uncharacterized protein                                                                                                              | -1.88 | -1.80 | -2.20 | 1.78E-07 |
| AFUA_6G02750 | Nascent polypeptide-associated complex subunit beta (NAC-beta) (Beta-NAC)                                                            | -0.07 | -1.80 | 1.06  | 1.12E-03 |
| AFUA_1G06680 | VHS domain protein                                                                                                                   | -2.21 | -1.78 | -1.34 | 5.91E-04 |
| AFUA_5G07080 | Beta-glucosidase, putative (EC 3.2.1.21)                                                                                             | -1.76 | -1.77 | -1.67 | 3.56E-05 |
| AFUA_1G03510 | ATP synthase subunit gamma                                                                                                           | -1.46 | -1.77 | 0.34  | 8.67E-06 |
| AFUA_2G09800 | Uncharacterized protein                                                                                                              | -2.51 | -1.75 | -1.43 | 9.85E-04 |
| AFUA_1G09330 | Eukaryotic translation initiation factor 3 subunit F (eIF3f)                                                                         | -1.76 | -1.75 | -0.85 | 7.35E-03 |
| AFUA_7G01010 | Alcohol dehydrogenase, putative (EC 1.1.1.1)                                                                                         | -2.36 | -1.74 | -1.73 | 3.63E-08 |
| AFUA_1G02420 | Uncharacterized protein                                                                                                              | -2.11 | -1.73 | -0.73 | 7.63E-03 |
| AFUA_5G07120 | RNP domain protein                                                                                                                   | -1.49 | -1.72 | -0.65 | 1.85E-02 |
| AFUA_7G03860 | DNA-directed RNA polymerase II subunit RPB1a, putative                                                                               | -1.06 | -1.71 | -0.54 | 3.88E-03 |
| AFUA_2G05400 | Sugar hydrolase, putative                                                                                                            | -1.59 | -1.70 | -1.59 | 7.69E-05 |
| AFUA_2G00820 | Extracellular GDSL-like lipase/acylhydrolase, putative                                                                               | -0.17 | -1.68 | -1.43 | 4.80E-05 |
| AFUA_7G04680 | Uncharacterized protein                                                                                                              | -0.60 | -1.67 | -0.85 | 4.65E-04 |
| AFUA_2G13290 | GYF domain protein                                                                                                                   | -1.40 | -1.66 | -1.13 | 1.99E-02 |
| AFUA_2G15840 | HET-C domain protein HetC                                                                                                            | -2.38 | -1.65 | -1.82 | 8.39E-03 |
| AFUA_2G12400 | ATP synthase oligomycin sensitivity conferral protein, putative (EC 3.6.3.14)                                                        | -0.02 | -1.64 | -0.42 | 4.96E-06 |
| AFUA_5G11540 | 37S ribosomal protein S5                                                                                                             | -0.68 | -1.64 | 0.74  | 2.42E-03 |
| AFUA_1G09830 | Hsc70 cochaperone (SGT), putative (EC 3.1.3.16)                                                                                      | -1.92 | -1.61 | -1.14 | 1.16E-04 |
| AFUA_1G06660 | CBS domain protein                                                                                                                   | -1.69 | -1.60 | -0.57 | 2.84E-02 |
| AFUA_2G09490 | Eukaryotic translation initiation factor subunit eIF-4F, putative                                                                    | -2.07 | -1.60 | -1.44 | 4.05E-05 |
| AFUA_7G01060 | Cysteine-rich secreted protein                                                                                                       | 1.44  | -1.60 | -0.47 | 8.24E-07 |
| AFUA_6G07120 | Nuclear movement protein NudC                                                                                                        | -2.62 | -1.57 | -1.32 | 5.54E-05 |
| AFUA_6G00510 | NADP-dependent alcohol dehydrogenase (EC 1.1.1.1)                                                                                    | -1.16 | -1.55 | -1.36 | 3.35E-06 |
| AFUA_4G07340 | Ubiquitin fusion degradation protein UfdB, putative                                                                                  | -1.65 | -1.55 | -1.21 | 2.91E-02 |
| AFUA_1G10630 | S-adenosylmethionine synthase (EC 2.5.1.6)                                                                                           | -1.74 | -1.55 | -0.37 | 1.75E-03 |
| AFUA_3G06460 | Uncharacterized protein                                                                                                              | -2.35 | -1.54 | 0.04  | 1.35E-05 |
| AFUA_5G09600 | 2-nitropropane dioxygenase family oxidoreductase, putative (EC 1.3.1.9)                                                              | 0.41  | -1.54 | -1.66 | 1.28E-03 |
| AFUA_1G11530 | 2,4-dihydroxyhept-2-ene-1,7-dioic acid aldolase (EC 4.1.2.20)                                                                        | -0.99 | -1.54 | -1.75 | 2.49E-05 |
| AFUA_2G13820 | SAP domain protein, putative                                                                                                         | -2.28 | -1.54 | -1.70 | 9.89E-07 |
| AFUA_3G00880 | UPF0619 GPI-anchored membrane protein<br>AFUA_3G00880                                                                                | -1.02 | -1.53 | -1.89 | 6.79E-04 |
| AFUA_1G06910 | Probable arabinogalactan endo-beta-1,4-galactanase A (EC 3.2.1.89) (Endo-1,4-beta-galactanase A) (Galactanase A)                     | -0.43 | -1.53 | -2.04 | 9.05E-06 |
| AFUA_4G10540 | Transcription regulator BDF1, putative                                                                                               | -2.07 | -1.51 | -0.99 | 3.91E-03 |
| AFUA_6G12500 | AhpC/TSA family protein                                                                                                              | -2.80 | -1.50 | -0.18 | 2.31E-08 |
| AFUA_3G13480 | Translation initiation factor 2 alpha subunit, putative                                                                              | -0.46 | -1.50 | 0.56  | 1.65E-02 |
| AFUA_3G06140 | Cytoskeleton assembly control protein Sla2, putative                                                                                 | -1.99 | -1.49 | -0.90 | 7.32E-06 |
| AFUA_4G03240 | Cell wall serine-threonine-rich galactomannoprotein Mpl                                                                              | -1.32 | -1.48 | -1.83 | 8.46E-08 |
| AFUA_2G08150 | NEDD8-like protein (RubA), putative                                                                                                  | -2.17 | -1.48 | -1.23 | 4.94E-06 |
| AFUA_1G10920 | Nuclear mRNA splicing factor-associated protein, putative                                                                            | 0.20  | -1.46 | -0.80 | 2.62E-02 |
| AFUA_1G12290 | NADH-ubiquinone oxidoreductase                                                                                                       | 0.18  | -1.46 | -0.75 | 1.28E-02 |
| AFUA_3G10490 | DNA damage response protein (Dap1), putative                                                                                         | -1.18 | -1.46 | -0.13 | 3.46E-03 |
| AFUA_6G07390 | Isocitrate dehydrogenase LysB (EC 1.1.1.41)                                                                                          | -2.92 | -1.46 | -1.36 | 9.63E-11 |
| AFUA_6G08990 | Uncharacterized protein                                                                                                              | -3.86 | -1.45 | -1.56 | 3.84E-04 |
| AFUA_5G08970 | Dolichyl-diphosphooligosaccharide--protein glycosyltransferase subunit WBP1 (Oligosaccharyl transferase subunit WBP1) (EC 2.4.99.18) | -1.28 | -1.44 | 0.16  | 9.80E-03 |
| AFUA_2G15510 | DUF866 domain protein                                                                                                                | 0.98  | -1.44 | -1.51 | 7.12E-07 |

|              |                                                                                                                              |       |       |       |          |
|--------------|------------------------------------------------------------------------------------------------------------------------------|-------|-------|-------|----------|
| AFUA_6G06370 | Isocitrate dehydrogenase [NAD] subunit, mitochondrial                                                                        | -1.61 | -1.44 | -0.10 | 7.68E-05 |
| AFUA_6G14490 | Probable beta-glucosidase H (EC 3.2.1.21) (Beta-D-glucoside glucohydrolase H) (Cellobiase H) (Gentiobiase H)                 | -0.21 | -1.41 | -1.33 | 4.68E-05 |
| AFUA_1G12190 | Uncharacterized protein                                                                                                      | -3.06 | -1.41 | -1.50 | 1.89E-05 |
| AFUA_3G10800 | Clustered mitochondria protein homolog (Protein TIF31 homolog)                                                               | -0.83 | -1.41 | -0.40 | 9.27E-03 |
| AFUA_2G12870 | Vesicular-fusion protein sec17                                                                                               | -1.52 | -1.40 | -0.72 | 1.24E-02 |
| AFUA_3G11390 | Proteasome regulatory particle subunit Rpt3, putative                                                                        | -0.27 | -1.39 | 0.80  | 3.95E-02 |
| AFUA_7G05650 | Glutamine-serine rich protein MS8, putative                                                                                  | -0.10 | -1.39 | -1.40 | 2.22E-02 |
| AFUA_1G04320 | 40S ribosomal protein S8                                                                                                     | -1.27 | -1.39 | 1.48  | 3.23E-02 |
| AFUA_5G12260 | Disulfide isomerase (TigA), putative (EC 5.3.4.1)                                                                            | -0.90 | -1.38 | -0.25 | 7.20E-03 |
| AFUA_6G06345 | 6,7-dimethyl-8-ribityllumazine synthase (DMRL synthase) (EC 2.5.1.78)                                                        | -0.63 | -1.37 | -1.59 | 2.54E-04 |
| AFUA_3G13240 | Aldose 1-epimerase, putative (EC 5.1.3.3)                                                                                    | -1.59 | -1.36 | -2.73 | 2.77E-06 |
| AFUA_2G17620 | Cellobiose dehydrogenase                                                                                                     | -1.08 | -1.36 | -2.19 | 1.66E-03 |
| AFUA_7G06050 | DNA damage-inducible protein 1                                                                                               | -1.67 | -1.35 | -1.16 | 7.27E-03 |
| AFUA_3G01210 | ThiJ/Pfpl family protein                                                                                                     | 0.03  | -1.35 | 0.43  | 3.74E-02 |
| AFUA_5G07890 | SsDNA binding protein, putative                                                                                              | -1.01 | -1.33 | -1.91 | 1.19E-06 |
| AFUA_4G00730 | HHE domain protein                                                                                                           | -3.40 | -1.32 | -0.37 | 1.99E-09 |
| AFUA_2G05590 | Ubiquitin carboxyl-terminal hydrolase (EC 3.4.19.12)                                                                         | -1.13 | -1.32 | -0.62 | 1.38E-04 |
| AFUA_6G02800 | Uncharacterized protein AFUA_6G02800                                                                                         | 0.12  | -1.31 | -0.76 | 3.90E-03 |
| AFUA_3G00840 | FAD-dependent oxygenase, putative                                                                                            | -1.72 | -1.31 | -1.95 | 3.99E-09 |
| AFUA_1G03140 | Glycosyl hydrolase, putative (EC 3.2.1.-)                                                                                    | -0.31 | -1.31 | -1.44 | 1.39E-06 |
| AFUA_1G02540 | EF hand domain protein                                                                                                       | -1.32 | -1.29 | -1.02 | 3.44E-06 |
| AFUA_4G01030 | Uncharacterized protein                                                                                                      | -2.57 | -1.27 | -2.29 | 2.17E-05 |
| AFUA_4G10010 | Hsp90 co-chaperone Cdc37                                                                                                     | -2.06 | -1.27 | -1.10 | 4.25E-04 |
| AFUA_3G06110 | Proteasome regulatory particle subunit (RpnC), putative                                                                      | 0.06  | -1.26 | 0.98  | 3.31E-02 |
| AFUA_1G06100 | Glutaredoxin Grx1, putative                                                                                                  | -3.93 | -1.25 | -0.60 | 2.72E-08 |
| AFUA_6G09950 | Uncharacterized protein                                                                                                      | 0.00  | -1.24 | -1.43 | 1.03E-04 |
| AFUA_2G02020 | Formamidase FmdS (EC 3.5.1.49)                                                                                               | -0.41 | -1.24 | -1.81 | 1.36E-07 |
| AFUA_2G12900 | Urease accessory protein UreG, putative                                                                                      | -0.61 | -1.24 | 0.06  | 3.55E-03 |
| AFUA_8G06550 | Carbonic anhydrase (EC 4.2.1.1) (Carbonate dehydratase)                                                                      | -1.28 | -1.24 | -1.12 | 2.66E-04 |
| AFUA_3G02190 | Uncharacterized protein                                                                                                      | 1.17  | -1.23 | -0.36 | 1.20E-02 |
| AFUA_1G04190 | Polyadenylate-binding protein, cytoplasmic and nuclear (PABP) (Poly(A)-binding protein) (Polyadenylate tail-binding protein) | -0.90 | -1.23 | -0.97 | 5.13E-03 |
| AFUA_4G06790 | Cytochrome b-c1 complex subunit 7                                                                                            | -0.50 | -1.22 | -0.46 | 1.01E-02 |
| AFUA_7G01510 | SNARE domain protein                                                                                                         | -2.85 | -1.22 | -1.04 | 5.25E-05 |
| AFUA_4G09900 | Cell wall biogenesis protein Ecm15, putative                                                                                 | -0.79 | -1.21 | -0.63 | 4.30E-02 |
| AFUA_7G01860 | Heat shock protein (Sti1), putative                                                                                          | -1.92 | -1.21 | -0.96 | 2.63E-07 |
| AFUA_6G05030 | Polysaccharide deacetylase family protein                                                                                    | -0.09 | -1.21 | -1.23 | 1.53E-03 |
| AFUA_1G05520 | Mandelate racemase/muconate lactonizing enzyme family protein (EC 4.2.1.6)                                                   | -0.94 | -1.21 | -1.50 | 1.37E-02 |
| AFUA_5G07040 | Ubiquitin conjugating enzyme (UbcA), putative (EC 6.3.2.19)                                                                  | -2.05 | -1.20 | 0.75  | 3.16E-02 |
| AFUA_1G10810 | V-type proton ATPase subunit C                                                                                               | -0.50 | -1.20 | -0.53 | 4.82E-02 |
| AFUA_3G14950 | Multicopper oxidase, putative (EC 1.7.99.-)                                                                                  | -0.62 | -1.20 | -0.80 | 9.80E-03 |
| AFUA_1G08840 | Guanylate kinase (EC 2.7.4.8)                                                                                                | -2.09 | -1.18 | -1.17 | 4.52E-06 |
| AFUA_6G02090 | ATP synthase subunit E, putative (EC 3.6.3.14)                                                                               | -1.26 | -1.17 | -0.77 | 5.70E-06 |
| AFUA_2G01250 | Serine peptidase, putative (EC 3.4.-.-)                                                                                      | -1.91 | -1.15 | -1.51 | 1.13E-04 |
| AFUA_8G05440 | Mitochondrial ATPase subunit ATP4, putative (EC 3.6.3.14)                                                                    | -1.19 | -1.15 | 0.29  | 5.86E-06 |
| AFUA_5G01340 | Lysophospholipase 2 (EC 3.1.1.5) (Phospholipase B 2)                                                                         | -1.77 | -1.14 | -1.25 | 2.57E-06 |
| AFUA_1G04070 | Eukaryotic translation initiation factor eIF-5A                                                                              | -0.20 | -1.14 | 0.40  | 7.67E-07 |
| AFUA_2G15770 | Cell wall biogenesis protein/glutathione transferase (Gto1), putative                                                        | -0.46 | -1.14 | -1.18 | 6.34E-05 |
| AFUA_1G15960 | Glutathione oxidoreductase Glr1, putative (EC 1.8.1.7)                                                                       | -0.75 | -1.13 | -1.66 | 6.15E-07 |
| AFUA_2G04610 | DUF967 domain protein                                                                                                        | -0.85 | -1.13 | -1.27 | 9.14E-04 |
| AFUA_4G08720 | Lysophospholipase 1 (EC 3.1.1.5) (Phospholipase B 1)                                                                         | -0.56 | -1.13 | -1.47 | 7.68E-06 |
| AFUA_3G08620 | SH3 domain protein                                                                                                           | 0.08  | -1.12 | -0.80 | 3.26E-02 |

|              |                                                                                                                                                               |       |       |       |          |
|--------------|---------------------------------------------------------------------------------------------------------------------------------------------------------------|-------|-------|-------|----------|
| AFUA_6G07070 | Probable 1,4-beta-D-glucan cellobiohydrolase A (EC 3.2.1.91) (Beta-glucancellobiohydrolase A) (Cellobiohydrolase D) (Exocellobiohydrolase A) (Exoglucanase A) | -1.01 | -1.12 | 0.42  | 3.99E-02 |
| AFUA_5G04250 | Homocysteine synthase CysD (EC 2.5.1.49)                                                                                                                      | -1.59 | -1.11 | -1.34 | 1.11E-05 |
| AFUA_8G05580 | Acetyl-coA hydrolase Ach1, putative (EC 2.8.3.8)                                                                                                              | -0.50 | -1.11 | -1.35 | 6.16E-07 |
| AFUA_2G02360 | UDP-glucose:glycoprotein glucosyltransferase, putative                                                                                                        | -1.99 | -1.10 | 0.04  | 3.50E-02 |
| AFUA_5G11320 | Thioredoxin                                                                                                                                                   | -2.63 | -1.09 | -1.17 | 8.05E-05 |
| AFUA_6G08720 | S-methyl-5'-thioadenosine phosphorylase (EC 2.4.2.28) (5'-methylthioadenosine phosphorylase) (MTA phosphorylase) (MTAP) (MTAPase)                             | -0.64 | -1.09 | -1.72 | 7.37E-06 |
| AFUA_6G04700 | Imidazoleglycerol-phosphate dehydratase (EC 4.2.1.19)                                                                                                         | -1.38 | -1.09 | -0.98 | 9.00E-03 |
| AFUA_4G11580 | Superoxide dismutase (EC 1.15.1.1)                                                                                                                            | -0.57 | -1.08 | -1.35 | 2.30E-02 |
| AFUA_1G10790 | Alpha-1,2-mannosidase family protein, putative                                                                                                                | 0.35  | -1.08 | -0.14 | 3.11E-04 |
| AFUA_5G06240 | Alcohol dehydrogenase, putative (EC 1.1.1.1)                                                                                                                  | -1.44 | -1.06 | -1.71 | 1.25E-08 |
| AFUA_6G14240 | Calcium sensor (NCS-1), putative                                                                                                                              | 0.14  | -1.06 | -0.67 | 1.68E-02 |
| AFUA_2G17110 | Cell division control protein Cdc48 (EC 3.6.1.-)                                                                                                              | -1.41 | -1.06 | 0.57  | 3.26E-05 |
| AFUA_6G14470 | Uncharacterized protein                                                                                                                                       | -0.31 | -1.05 | -1.98 | 2.67E-06 |
| AFUA_8G00630 | Uncharacterized protein                                                                                                                                       | -0.90 | -1.05 | -0.99 | 2.08E-04 |
| AFUA_2G09290 | Antigenic mitochondrial protein HSP60, putative                                                                                                               | -2.39 | -1.04 | -0.37 | 4.15E-11 |
| AFUA_1G06580 | High expression lethality protein Hel10, putative                                                                                                             | 1.24  | -1.04 | -1.37 | 4.99E-06 |
| AFUA_7G03870 | Actin cytoskeleton-regulatory complex protein pan1                                                                                                            | -1.70 | -1.04 | -1.43 | 2.40E-03 |
| AFUA_1G16523 | 40S ribosomal protein S25, putative                                                                                                                           | -0.68 | -1.03 | 2.30  | 1.88E-06 |
| AFUA_5G02090 | UPF0047 domain protein                                                                                                                                        | -0.84 | -1.02 | -1.54 | 3.49E-04 |
| AFUA_2G11060 | Acyl CoA binding protein family                                                                                                                               | -1.87 | -1.01 | -1.69 | 2.34E-07 |
| AFUA_2G16830 | Endonuclease/exonuclease/phosphatase family protein                                                                                                           | -0.58 | -1.01 | -1.62 | 2.19E-06 |
| AFUA_4G07910 | Mitochondrial presequence protease (EC 3.4.24.-)                                                                                                              | 1.18  | 1.01  | 1.04  | 7.78E-06 |
| AFUA_2G00680 | Glycosyl hydrolase, putative                                                                                                                                  | -0.14 | 1.01  | 1.63  | 1.32E-02 |
| AFUA_2G01330 | Exosome complex subunit Rrp46, putative (EC 3.1.13.-)                                                                                                         | -0.13 | 1.01  | 2.12  | 2.83E-02 |
| AFUA_7G06840 | Class III aminotransferase, putative (EC 2.6.1.-)                                                                                                             | -1.19 | 1.01  | -0.22 | 8.20E-03 |
| AFUA_1G10130 | Adenosylhomocysteinase (EC 3.3.1.1)                                                                                                                           | 1.30  | 1.01  | 2.02  | 3.28E-05 |
| AFUA_1G12340 | Carnitine acetyl transferase                                                                                                                                  | 1.02  | 1.01  | 2.16  | 3.89E-03 |
| AFUA_4G13120 | Glutamine synthetase (EC 6.3.1.2)                                                                                                                             | -0.37 | 1.01  | 2.23  | 6.13E-05 |
| AFUA_6G07760 | Proteasome regulatory particle subunit (RpnG), putative                                                                                                       | 2.46  | 1.02  | 2.61  | 2.81E-05 |
| AFUA_4G09090 | Thioredoxin, putative                                                                                                                                         | 0.49  | 1.02  | 0.95  | 1.25E-04 |
| AFUA_2G08130 | 60S ribosomal protein L44                                                                                                                                     | 1.76  | 1.02  | 4.10  | 2.38E-06 |
| AFUA_4G13310 | Metallo-beta-lactamase domain protein, putative                                                                                                               | 1.22  | 1.02  | 0.72  | 1.34E-02 |
| AFUA_3G10130 | Fructosyl amino acid oxidasesarcosine oxidase, putative                                                                                                       | 1.24  | 1.03  | 1.15  | 2.40E-02 |
| AFUA_3G07150 | Succinate-semialdehyde dehydrogenase, putative (EC 1.2.1.24)                                                                                                  | 0.96  | 1.03  | 1.36  | 1.42E-05 |
| AFUA_4G09840 | Kynureninase 2 (EC 3.7.1.3) (Biosynthesis of nicotinic acid protein 5-2) (L-kynurenine hydrolase 2)                                                           | 1.89  | 1.03  | 1.19  | 1.40E-06 |
| AFUA_2G13250 | Tryptophan synthase (EC 4.2.1.20)                                                                                                                             | 1.57  | 1.05  | 2.10  | 4.86E-03 |
| AFUA_1G15720 | Importin beta-1 subunit                                                                                                                                       | 1.07  | 1.05  | 1.43  | 4.24E-02 |
| AFUA_5G02720 | Phosphoribosylformylglycinamide synthase (EC 6.3.5.3)                                                                                                         | 0.47  | 1.06  | 1.82  | 1.42E-02 |
| AFUA_4G00740 | Uncharacterized protein                                                                                                                                       | 1.97  | 1.06  | 2.46  | 2.53E-06 |
| AFUA_2G09140 | Uncharacterized protein                                                                                                                                       | 0.84  | 1.06  | 0.38  | 7.03E-04 |
| AFUA_7G02230 | mRNA binding post-transcriptional regulator (Csx1), putative                                                                                                  | 1.96  | 1.06  | 1.46  | 4.21E-02 |
| AFUA_5G06710 | DUF89 domain protein                                                                                                                                          | -0.36 | 1.07  | 1.81  | 1.10E-04 |
| AFUA_2G01010 | Myo-inositol-phosphate synthase, putative (EC 5.5.1.-)                                                                                                        | 0.55  | 1.07  | 0.19  | 7.52E-05 |
| AFUA_4G05910 | NADH-ubiquinone oxidoreductase 21 kDa subunit, putative (EC 1.6.5.3)                                                                                          | 0.38  | 1.07  | 2.06  | 4.78E-02 |
| AFUA_5G14840 | Uncharacterized protein                                                                                                                                       | -0.69 | 1.08  | -0.13 | 1.74E-02 |
| AFUA_3G10970 | Protein-tyrosine phosphatase 2 (EC 3.1.3.48)                                                                                                                  | 2.63  | 1.09  | 2.48  | 3.79E-02 |
| AFUA_6G13440 | Choline sulfatase, putative (EC 3.1.6.6)                                                                                                                      | 3.50  | 1.09  | 2.07  | 9.70E-04 |
| AFUA_8G04000 | Acetyl-CoA acetyltransferase, putative (EC 2.3.1.9)                                                                                                           | 0.93  | 1.09  | 0.78  | 7.20E-05 |
| AFUA_1G12250 | Mitochondrial hypoxia responsive domain protein                                                                                                               | 3.82  | 1.09  | 1.94  | 2.25E-02 |

|              |                                                                                                                                              |       |      |       |          |
|--------------|----------------------------------------------------------------------------------------------------------------------------------------------|-------|------|-------|----------|
| AFUA_4G11650 | Alpha-ketoglutarate dehydrogenase complex subunit Kgd1, putative (EC 1.2.4.2)                                                                | 0.89  | 1.10 | 1.82  | 1.61E-04 |
| AFUA_2G12410 | Uncharacterized protein                                                                                                                      | 0.60  | 1.10 | 1.47  | 2.47E-05 |
| AFUA_2G15660 | Aldehyde dehydrogenase                                                                                                                       | 1.13  | 1.10 | 1.38  | 2.25E-04 |
| AFUA_7G02140 | 40S ribosomal protein S24                                                                                                                    | 1.90  | 1.10 | 3.49  | 1.13E-02 |
| AFUA_5G03760 | Endochitinase A1 (EC 3.2.1.14) (Chitinase A1)                                                                                                | 1.55  | 1.10 | 1.52  | 1.32E-03 |
| AFUA_2G01240 | Beta-fructofuranosidase, putative (EC 3.2.1.-)                                                                                               | 0.50  | 1.11 | -0.22 | 3.75E-05 |
| AFUA_1G13330 | Arp2/3 complex subunit (Arp2), putative                                                                                                      | 0.87  | 1.12 | 2.22  | 4.22E-04 |
| AFUA_5G08910 | 3-methylcrotonyl-CoA carboxylase subunit alpha (MccA), putative (EC 6.4.1.4)                                                                 | 2.09  | 1.12 | 1.26  | 7.48E-06 |
| AFUA_1G04620 | Alcohol dehydrogenase, zinc-containing, putative (EC 1.1.1.-)                                                                                | 1.52  | 1.12 | 2.28  | 9.14E-03 |
| AFUA_6G12990 | Cytosolic large ribosomal subunit protein L7A                                                                                                | 1.41  | 1.13 | 3.48  | 6.45E-08 |
| AFUA_3G12840 | Signal peptidase complex catalytic subunit sec11 (EC 3.4.21.89) (Signal peptidase I)                                                         | 2.53  | 1.13 | 1.83  | 1.78E-02 |
| AFUA_1G08940 | Pheromone-processing carboxypeptidase kex1 (EC 3.4.16.6) (Carboxypeptidase D)                                                                | 1.35  | 1.13 | 1.04  | 3.43E-02 |
| AFUA_4G09110 | Cytochrome c peroxidase, mitochondrial (CCP) (EC 1.11.1.5)                                                                                   | 0.78  | 1.14 | 1.59  | 1.79E-04 |
| AFUA_5G07750 | Ferrochelatase (EC 4.99.1.1)                                                                                                                 | 1.68  | 1.14 | 1.65  | 3.04E-02 |
| AFUA_5G01970 | Glyceraldehyde-3-phosphate dehydrogenase (EC 1.2.1.12)                                                                                       | 0.76  | 1.14 | 1.82  | 2.55E-05 |
| AFUA_3G14990 | Alpha/beta hydrolase, putative (EC 3.-.-.-)                                                                                                  | 1.85  | 1.14 | 1.66  | 5.44E-05 |
| AFUA_1G06820 | Uncharacterized protein                                                                                                                      | -0.98 | 1.15 | 1.60  | 3.42E-04 |
| AFUA_4G03760 | Glycine cleavage system P protein (EC 1.4.4.2)                                                                                               | 0.84  | 1.15 | 0.71  | 3.35E-04 |
| AFUA_2G11290 | Orotate phosphoribosyltransferase (EC 2.4.2.10)                                                                                              | -0.51 | 1.15 | 2.21  | 5.62E-08 |
| AFUA_5G08640 | Integral membrane protein                                                                                                                    | 2.24  | 1.16 | -0.60 | 2.10E-03 |
| AFUA_2G05510 | Mitochondrial F1F0 ATP synthase subunit F (Atp17), putative (EC 3.6.3.14)                                                                    | 1.89  | 1.16 | 2.45  | 1.23E-04 |
| AFUA_7G04380 | Alcohol dehydrogenase, putative (EC 1.1.1.1)                                                                                                 | 1.17  | 1.16 | 1.10  | 4.69E-03 |
| AFUA_4G11290 | Proteasome activator subunit 4, putative                                                                                                     | 1.35  | 1.17 | 1.93  | 9.16E-04 |
| AFUA_6G11310 | Bifunctional pyrimidine biosynthesis protein (PyrABCN), putative (EC 6.3.5.5)                                                                | 2.24  | 1.17 | 1.15  | 9.53E-06 |
| AFUA_4G13530 | Trehalase (EC 3.2.1.28) (Alpha-trehalose glucohydrolase)                                                                                     | 0.41  | 1.17 | 1.64  | 7.73E-03 |
| AFUA_2G17550 | Heptaketide hydrolyase ayg1 (EC 3.7.1.-) (Conidial pigment biosynthesis protein ayg1)                                                        | -1.11 | 1.18 | 0.25  | 5.29E-10 |
| AFUA_8G07190 | Uncharacterized protein                                                                                                                      | 1.05  | 1.18 | 2.56  | 8.55E-04 |
| AFUA_3G10760 | Phosphoketolase, putative                                                                                                                    | 0.95  | 1.18 | 1.96  | 3.89E-03 |
| AFUA_3G11750 | Oxysterol binding protein (Osh5), putative                                                                                                   | 1.98  | 1.18 | 2.24  | 1.90E-04 |
| AFUA_1G02670 | Arp2/3 complex 34 kDa subunit                                                                                                                | 1.26  | 1.18 | 2.31  | 1.01E-04 |
| AFUA_5G02300 | Peroxidase, putative (EC 1.11.1.-)                                                                                                           | 2.77  | 1.19 | 1.51  | 2.77E-05 |
| AFUA_5G03540 | Thioredoxin reductase, putative (EC 1.-.-.-)                                                                                                 | 2.34  | 1.20 | 0.36  | 2.53E-08 |
| AFUA_1G01490 | NACHT domain protein                                                                                                                         | 2.42  | 1.20 | 2.02  | 5.24E-07 |
| AFUA_1G09020 | Nuclear pore complex protein (SonA), putative                                                                                                | 2.02  | 1.20 | 1.02  | 2.25E-04 |
| AFUA_2G05910 | Phosphotransferase (EC 2.7.1.-)                                                                                                              | -0.01 | 1.20 | 2.12  | 8.68E-07 |
| AFUA_2G04310 | Argininosuccinate synthase (EC 6.3.4.5)                                                                                                      | 2.05  | 1.20 | 2.41  | 2.55E-03 |
| AFUA_3G01450 | 3-methyl-2-oxobutanoate dehydrogenase, putative                                                                                              | 1.80  | 1.21 | 0.64  | 2.22E-04 |
| AFUA_1G05850 | Erythromycin esterase, putative                                                                                                              | -0.16 | 1.22 | 2.48  | 6.61E-03 |
| AFUA_4G07590 | CaaX prenyl protease Ste24 (EC 3.4.24.84)                                                                                                    | 3.20  | 1.22 | 2.67  | 7.52E-04 |
| AFUA_6G02280 | Peroxiredoxin Asp f3 (Prx) (EC 1.11.1.15) (Thioredoxin peroxidase) (TPx) (allergen Asp f 3)                                                  | 1.92  | 1.22 | 1.20  | 9.23E-10 |
| AFUA_4G09660 | Secretory component protein shr3, putative                                                                                                   | 0.78  | 1.23 | 2.32  | 4.55E-02 |
| AFUA_4G14070 | Glycosyl transferase, putative (EC 2.-.-.-)                                                                                                  | -0.24 | 1.23 | 1.60  | 4.77E-04 |
| AFUA_3G00230 | Beta-glucosidase, putative (EC 3.2.1.21)                                                                                                     | 0.64  | 1.23 | 0.35  | 1.46E-02 |
| AFUA_3G03950 | Endoglucanase, putative                                                                                                                      | 0.49  | 1.23 | -0.02 | 4.45E-03 |
| AFUA_4G10200 | Transcription factor RfeF, putative                                                                                                          | 1.90  | 1.23 | 0.40  | 1.32E-06 |
| AFUA_1G09800 | Obg-like ATPase 1                                                                                                                            | 0.49  | 1.23 | 1.67  | 2.22E-05 |
| AFUA_2G15980 | 3' exoribonuclease family protein                                                                                                            | 0.02  | 1.24 | 2.20  | 4.73E-03 |
| AFUA_5G06390 | Adenosine kinase, putative (EC 2.7.1.20)                                                                                                     | 2.09  | 1.25 | 3.06  | 2.24E-06 |
| AFUA_1G10310 | RNase L inhibitor of the ABC superfamily, putative                                                                                           | 2.57  | 1.26 | 1.67  | 3.21E-03 |
| AFUA_4G08070 | Glycylpeptide N-tetradecanoyltransferase (EC 2.3.1.97) (Myristoyl-CoA:protein N-myristoyltransferase) (NMT) (Peptide N-myristoyltransferase) | 0.76  | 1.26 | 2.14  | 1.19E-02 |
| AFUA_4G04200 | Myo-inositol-1(Or 4)-monophosphatase (EC 3.1.3.7)                                                                                            | 1.30  | 1.26 | 0.92  | 7.10E-03 |



|              |                                                                                                                                                                                                      |       |      |      |          |
|--------------|------------------------------------------------------------------------------------------------------------------------------------------------------------------------------------------------------|-------|------|------|----------|
| AFUA_5G02240 | NAD dependent epimerase/dehydratase family protein (EC 1.1.1.133)                                                                                                                                    | 0.63  | 1.26 | 1.48 | 1.13E-05 |
| AFUA_4G09010 | mRNA splicing protein (Prp39), putative                                                                                                                                                              | 1.05  | 1.27 | 2.22 | 2.27E-02 |
| AFUA_1G05210 | G-protein complex gamma subunit GpgA                                                                                                                                                                 | 0.33  | 1.27 | 1.49 | 1.70E-03 |
| AFUA_4G04350 | DEAD helicases superfamily protein (Aquarius), putative                                                                                                                                              | 2.26  | 1.27 | 2.48 | 1.26E-02 |
| AFUA_4G11770 | Glutathione transferase, putative                                                                                                                                                                    | 0.91  | 1.27 | 1.25 | 1.16E-03 |
| AFUA_1G02030 | Eukaryotic translation initiation factor 3 subunit B (eIF3b) (Eukaryotic translation initiation factor 3 90 kDa subunit homolog) (eIF3 p90) (Translation initiation factor eIF3 p90 subunit homolog) | 1.64  | 1.28 | 1.67 | 5.02E-03 |
| AFUA_3G00900 | Alpha-amylase, putative                                                                                                                                                                              | 1.74  | 1.28 | 0.97 | 1.10E-05 |
| AFUA_6G04660 | Centromere protein Cse4, putative                                                                                                                                                                    | 2.02  | 1.28 | 2.55 | 1.63E-02 |
| AFUA_6G08740 | 3-dehydroshikimate dehydratase, putative (EC 4.2.1.-)                                                                                                                                                | 1.23  | 1.28 | 1.52 | 1.10E-03 |
| AFUA_4G07700 | Clathrin heavy chain                                                                                                                                                                                 | 1.01  | 1.28 | 1.93 | 7.89E-07 |
| AFUA_3G02257 | Uncharacterized protein                                                                                                                                                                              | 1.22  | 1.29 | 2.68 | 3.05E-04 |
| AFUA_4G00290 | Succinyl-CoA synthetase beta subunit, putative (EC 6.2.1.4)                                                                                                                                          | 0.63  | 1.29 | 1.82 | 3.89E-02 |
| AFUA_4G14450 | Mannitol 2-dehydrogenase (M2DH) (MDH) (EC 1.1.1.67)                                                                                                                                                  | 1.63  | 1.31 | 1.97 | 1.45E-06 |
| AFUA_5G02350 | Hydrolase, carbon-nitrogen family, putative                                                                                                                                                          | 2.87  | 1.32 | 2.15 | 1.12E-02 |
| AFUA_4G07730 | 60S ribosomal protein L11                                                                                                                                                                            | 2.60  | 1.32 | 4.11 | 1.78E-06 |
| AFUA_4G14560 | Atrochryson carboxylic acid synthase (ACAS) (EC 2.3.1.-) (Non-reducing polyketide synthase tpcC) (Trypacidin synthesis protein C)                                                                    | -0.13 | 1.32 | 0.89 | 4.83E-02 |
| AFUA_3G11610 | Non-histone chromosomal protein 6                                                                                                                                                                    | 0.61  | 1.32 | 1.38 | 1.58E-05 |
| AFUA_3G05610 | Uncharacterized protein                                                                                                                                                                              | 1.20  | 1.33 | 0.81 | 4.71E-05 |
| AFUA_5G08980 | NADH-ubiquinone oxidoreductase 9.5 kDa subunit, putative (EC 1.6.5.3)                                                                                                                                | 2.51  | 1.33 | 1.80 | 5.73E-03 |
| AFUA_4G09320 | Probable dipeptidyl peptidase 4 (EC 3.4.14.5) (Dipeptidyl peptidase IV) (DPP IV) (DppIV)                                                                                                             | 0.99  | 1.33 | 0.18 | 9.60E-07 |
| AFUA_3G12510 | Vesicular fusion ATPase, putative                                                                                                                                                                    | 3.29  | 1.34 | 1.38 | 5.57E-05 |
| AFUA_1G12940 | Mitogen-activated protein kinase hog1 (MAP kinase hog1) (EC 2.7.11.24)                                                                                                                               | 1.43  | 1.34 | 2.07 | 8.26E-03 |
| AFUA_7G01830 | UTP-glucose-1-phosphate uridylyltransferase Ugp1, putative                                                                                                                                           | 0.00  | 1.35 | 2.11 | 4.43E-05 |
| AFUA_8G05590 | Oxidoreductase, short chain dehydrogenase/reductase family                                                                                                                                           | 1.33  | 1.35 | 1.27 | 7.36E-05 |
| AFUA_4G09140 | L-ornithine aminotransferase Car2, putative (EC 2.6.1.13)                                                                                                                                            | 1.51  | 1.35 | 1.05 | 2.77E-07 |
| AFUA_3G00680 | Amine oxidase (EC 1.4.3.-)                                                                                                                                                                           | 3.44  | 1.35 | 1.88 | 1.22E-03 |
| AFUA_4G11720 | Phosphatidyl synthase                                                                                                                                                                                | 0.57  | 1.36 | 2.06 | 3.69E-08 |
| AFUA_1G13590 | Uncharacterized protein                                                                                                                                                                              | 1.13  | 1.36 | 0.90 | 2.35E-02 |
| AFUA_6G13330 | RNA binding protein, putative                                                                                                                                                                        | 0.65  | 1.36 | 1.72 | 1.25E-06 |
| AFUA_3G05740 | Aldose 1-epimerase, putative (EC 5.1.3.3)                                                                                                                                                            | 1.47  | 1.36 | 1.46 | 1.87E-02 |
| AFUA_2G03380 | Alkaline serine protease                                                                                                                                                                             | 2.14  | 1.37 | 4.85 | 1.02E-04 |
| AFUA_1G13260 | Coatomer subunit epsilon                                                                                                                                                                             | 0.97  | 1.37 | 1.31 | 1.66E-02 |
| AFUA_3G05350 | Histone H2B                                                                                                                                                                                          | 1.24  | 1.37 | 2.21 | 5.77E-07 |
| AFUA_4G07845 | 60S ribosomal protein L38, putative                                                                                                                                                                  | 1.15  | 1.37 | 3.10 | 7.41E-05 |
| AFUA_8G01420 | Quinone oxidoreductase, putative (EC 1.6.5.5)                                                                                                                                                        | 1.55  | 1.38 | 1.85 | 5.05E-04 |
| AFUA_3G04220 | Fatty acid synthase beta subunit, putative                                                                                                                                                           | 1.30  | 1.38 | 2.47 | 5.78E-09 |
| AFUA_4G13760 | Uncharacterized protein                                                                                                                                                                              | 2.28  | 1.38 | 1.22 | 1.74E-02 |
| AFUA_4G00180 | Fatty acid oxygenase, putative (EC 1.-.-)                                                                                                                                                            | 0.87  | 1.39 | 2.19 | 7.54E-03 |
| AFUA_5G02480 | Glycogen [starch] synthase (EC 2.4.1.11)                                                                                                                                                             | 1.58  | 1.39 | 2.40 | 6.34E-05 |
| AFUA_1G06960 | Pyruvate dehydrogenase E1 component subunit alpha (EC 1.2.4.1)                                                                                                                                       | 1.08  | 1.40 | 2.85 | 5.87E-08 |
| AFUA_7G05290 | 40S ribosomal protein S13                                                                                                                                                                            | 2.13  | 1.40 | 4.21 | 4.71E-06 |
| AFUA_3G10460 | Nuclear transport factor NTF-2, putative                                                                                                                                                             | 1.98  | 1.40 | 1.80 | 6.04E-05 |
| AFUA_1G14490 | Aminotransferase, putative                                                                                                                                                                           | 1.06  | 1.40 | 1.61 | 1.36E-02 |
| AFUA_3G07300 | ABC multidrug transporter, putative (EC 3.6.3.-)                                                                                                                                                     | 1.49  | 1.40 | 1.92 | 1.46E-03 |
| AFUA_1G02570 | Aspartyl-tRNA synthetase, cytoplasmic (EC 6.1.1.12)                                                                                                                                                  | 3.37  | 1.41 | 2.82 | 2.34E-05 |
| AFUA_7G05360 | FACT complex subunit pob3 (Facilitates chromatin transcription complex subunit pob3)                                                                                                                 | 1.86  | 1.41 | 2.07 | 6.65E-04 |
| AFUA_4G13500 | Aldehyde dehydrogenase                                                                                                                                                                               | 2.15  | 1.42 | 2.54 | 6.03E-05 |
| AFUA_2G16070 | Urease accessory protein UreD                                                                                                                                                                        | 1.36  | 1.42 | 0.67 | 2.51E-02 |

|              |                                                                                                                                                                 |       |      |       |          |
|--------------|-----------------------------------------------------------------------------------------------------------------------------------------------------------------|-------|------|-------|----------|
| AFUA_3G08640 | Eukaryotic translation initiation factor 3 subunit I (eIF3i) (Eukaryotic translation initiation factor 3 39 kDa subunit homolog) (eIF-3 39 kDa subunit homolog) | 2.38  | 1.42 | 2.53  | 2.45E-04 |
| AFUA_4G02840 | NmrA-like family protein, putative                                                                                                                              | 2.09  | 1.42 | -0.34 | 2.28E-04 |
| AFUA_2G01030 | 1-aminocyclopropane-1-carboxylate deaminase, putative (EC 3.5.99.7)                                                                                             | 1.39  | 1.42 | 1.51  | 6.06E-04 |
| AFUA_6G06500 | Actin-related protein 2/3 complex subunit 1A, putative                                                                                                          | 0.87  | 1.42 | 1.99  | 2.53E-05 |
| AFUA_5G06130 | Succinate--CoA ligase [ADP-forming] subunit alpha, mitochondrial (EC 6.2.1.5) (Succinyl-CoA synthetase subunit alpha) (SCS-alpha)                               | -0.10 | 1.42 | 2.15  | 4.63E-07 |
| AFUA_5G03860 | Alkaline phosphatase family protein (EC 3.1.-.-)                                                                                                                | 2.91  | 1.43 | 2.99  | 2.46E-03 |
| AFUA_5G11720 | 26S proteasome regulatory subunit Mts4, putative                                                                                                                | 0.63  | 1.44 | 2.69  | 8.14E-05 |
| AFUA_2G04590 | Alcohol dehydrogenase, putative (EC 1.1.1.-)                                                                                                                    | 2.84  | 1.45 | 1.67  | 1.37E-04 |
| AFUA_5G02640 | O-methyltransferase, putative (EC 2.1.1.-)                                                                                                                      | 4.70  | 1.45 | 0.38  | 1.42E-07 |
| AFUA_3G08650 | C1 tetrahydrofolate synthase, putative (EC 6.3.4.3)                                                                                                             | 0.76  | 1.45 | 2.18  | 3.94E-07 |
| AFUA_6G04920 | Formate dehydrogenase (FDH) (EC 1.2.1.2) (NAD-dependent formate dehydrogenase)                                                                                  | 1.83  | 1.45 | 1.22  | 2.23E-08 |
| AFUA_6G08780 | Proline utilization protein PrnX, putative (EC 4.3.1.12)                                                                                                        | 1.85  | 1.46 | 1.85  | 2.55E-03 |
| AFUA_2G09130 | NADH-ubiquinone dehydrogenase 24 kDa subunit, putative (EC 1.6.5.3)                                                                                             | 1.56  | 1.46 | 1.71  | 3.08E-05 |
| AFUA_4G08880 | Glucose-6-phosphate 1-epimerase (EC 5.1.3.15)                                                                                                                   | -0.32 | 1.46 | 2.61  | 7.00E-05 |
| AFUA_1G14090 | Histidinol-phosphate aminotransferase (EC 2.6.1.9)                                                                                                              | 2.20  | 1.47 | 2.98  | 3.93E-06 |
| AFUA_5G11560 | Arp2/3 complex subunit (Arp3), putative                                                                                                                         | 1.00  | 1.47 | 2.29  | 2.40E-04 |
| AFUA_3G03000 | Phosphatidylethanolamine-binding protein, putative                                                                                                              | 1.03  | 1.47 | 1.62  | 1.71E-02 |
| AFUA_6G12630 | Leucyl-tRNA synthetase (EC 6.1.1.4)                                                                                                                             | 0.81  | 1.47 | 2.60  | 8.15E-04 |
| AFUA_3G12800 | Clathrin-coated vesicle protein (Bud7), putative                                                                                                                | 1.84  | 1.48 | 0.84  | 3.28E-02 |
| AFUA_5G08940 | 3-methylcrotonyl-CoA carboxylase, beta subunit (MccB), putative (EC 6.4.1.3)                                                                                    | 2.37  | 1.48 | 1.54  | 3.45E-03 |
| AFUA_1G04820 | Probable NAD(P)H-dependent D-xylose reductase xyl1 (XR) (EC 1.1.1.307)                                                                                          | 1.34  | 1.48 | 1.27  | 3.13E-08 |
| AFUA_4G00370 | General amidase, putative                                                                                                                                       | -0.03 | 1.49 | 0.19  | 5.38E-03 |
| AFUA_3G13900 | Glutamate-cysteine ligase Gcs1, putative                                                                                                                        | 0.85  | 1.49 | 2.61  | 2.19E-03 |
| AFUA_2G01040 | S-(hydroxymethyl)glutathione dehydrogenase (EC 1.1.1.284)                                                                                                       | 2.46  | 1.49 | 0.21  | 1.09E-09 |
| AFUA_6G06900 | Rho GTPase Rho1                                                                                                                                                 | 2.00  | 1.49 | 1.54  | 6.27E-06 |
| AFUA_3G04170 | Pyruvate dehydrogenase E1 beta subunit PdbA, putative (EC 1.2.4.1)                                                                                              | 0.96  | 1.49 | 2.82  | 9.42E-09 |
| AFUA_5G03350 | Glutamine-dependent NAD(+) synthetase (EC 6.3.5.1) (NAD(+) synthase [glutamine-hydrolyzing])                                                                    | 0.47  | 1.51 | 1.84  | 5.06E-03 |
| AFUA_2G17430 | Oxidoreductase 2-nitropropane dioxygenase family, putative (EC 1.13.11.-)                                                                                       | 1.09  | 1.52 | 2.01  | 3.46E-03 |
| AFUA_1G01680 | Branched-chain amino acid aminotransferase (EC 2.6.1.42)                                                                                                        | 2.36  | 1.53 | 1.12  | 2.97E-04 |
| AFUA_2G09180 | Coatomer subunit zeta, putative                                                                                                                                 | 1.38  | 1.53 | 2.49  | 2.59E-02 |
| AFUA_3G01580 | GMC oxidoreductase, putative                                                                                                                                    | 1.44  | 1.53 | 1.48  | 2.64E-02 |
| AFUA_6G04570 | Translation elongation factor eEF-1 subunit gamma, putative                                                                                                     | 1.92  | 1.53 | 1.72  | 4.63E-06 |
| AFUA_3G06210 | Phosphoribosyl-aminoimidazole-succinocarboxamide synthase (EC 6.3.2.6)                                                                                          | -0.11 | 1.53 | 2.33  | 2.96E-06 |
| AFUA_2G10500 | 40S ribosomal protein Rps16, putative                                                                                                                           | 2.04  | 1.54 | 3.83  | 3.79E-05 |
| AFUA_5G05480 | Rheb small monomeric GTPase RhbA                                                                                                                                | 1.88  | 1.54 | 1.84  | 1.32E-02 |
| AFUA_2G02490 | Uncharacterized protein                                                                                                                                         | 1.74  | 1.54 | 1.77  | 3.09E-03 |
| AFUA_1G07200 | Mitochondrial cytochrome b2, putative (EC 1.1.2.3)                                                                                                              | 1.82  | 1.54 | 1.70  | 1.56E-06 |
| AFUA_2G15190 | Ribulose-phosphate 3-epimerase (EC 5.1.3.1)                                                                                                                     | 1.31  | 1.55 | 1.37  | 1.38E-07 |
| AFUA_2G11560 | Galactose-1-phosphate uridylyltransferase (EC 2.7.7.12)                                                                                                         | 1.97  | 1.56 | 1.62  | 1.77E-04 |
| AFUA_6G08750 | Delta-1-pyrroline-5-carboxylate dehydrogenase PrnC (EC 1.2.1.88)                                                                                                | 2.10  | 1.56 | 1.26  | 3.94E-08 |
| AFUA_1G12610 | Hsp70 chaperone Hsp88                                                                                                                                           | 1.37  | 1.56 | 1.54  | 1.28E-03 |
| AFUA_3G10480 | Meiotic sister chromatid recombination protein Ish1/Msc1, putative                                                                                              | 0.76  | 1.56 | 2.10  | 3.29E-06 |
| AFUA_7G00700 | Aldo-keto reductase (AKR13), putative (EC 1.1.1.-)                                                                                                              | 1.86  | 1.56 | 2.73  | 2.34E-05 |
| AFUA_1G13780 | Histone H4                                                                                                                                                      | 1.92  | 1.56 | 2.39  | 1.19E-03 |
| AFUA_5G05680 | Peptide chain release factor eRF/aRF, subunit 1                                                                                                                 | 1.89  | 1.57 | 2.19  | 8.67E-06 |
| AFUA_1G04720 | C-8 sterol isomerase (Erg-1), putative                                                                                                                          | 3.48  | 1.57 | 1.64  | 3.80E-04 |

|              |                                                                                                                                                                  |       |      |      |          |
|--------------|------------------------------------------------------------------------------------------------------------------------------------------------------------------|-------|------|------|----------|
| AFUA_3G08430 | Mitochondrial phosphate carrier protein, putative                                                                                                                | 3.04  | 1.57 | 2.38 | 5.50E-03 |
| AFUA_5G08650 | Uncharacterized protein                                                                                                                                          | 0.60  | 1.57 | 1.29 | 4.77E-02 |
| AFUA_1G14410 | 60S ribosomal protein L17                                                                                                                                        | 1.79  | 1.58 | 4.32 | 4.06E-08 |
| AFUA_6G03830 | Ribosomal protein L14                                                                                                                                            | 2.30  | 1.58 | 4.26 | 6.50E-08 |
| AFUA_5G10560 | Cytochrome c oxidase subunit V                                                                                                                                   | 2.91  | 1.58 | 2.70 | 1.01E-06 |
| AFUA_5G03480 | Methylenetetrahydrofolate reductase (EC 1.5.1.20)                                                                                                                | 1.32  | 1.59 | 2.06 | 4.56E-02 |
| AFUA_3G09910 | Phosphatidylinositol transporter, putative                                                                                                                       | 1.29  | 1.59 | 2.31 | 5.91E-05 |
| AFUA_6G04010 | Chromosome segregation protein Cse1, putative                                                                                                                    | 1.43  | 1.60 | 2.03 | 7.04E-05 |
| AFUA_4G14100 | Glutathione S-transferase, putative                                                                                                                              | 0.68  | 1.60 | 1.64 | 2.44E-02 |
| AFUA_3G08660 | Isocitrate dehydrogenase [NADP] (EC 1.1.1.42)                                                                                                                    | 2.19  | 1.60 | 1.11 | 2.02E-07 |
| AFUA_2G18030 | Catalase easC (EC 1.11.-.-) (Ergot alkaloid synthesis protein C)                                                                                                 | 1.23  | 1.60 | 2.07 | 1.29E-04 |
| AFUA_2G00330 | Beta-alanine synthase, putative (EC 3.5.1.-)                                                                                                                     | 1.89  | 1.60 | 0.59 | 7.65E-04 |
| AFUA_2G04930 | Uncharacterized protein                                                                                                                                          | 1.69  | 1.61 | 1.26 | 4.59E-03 |
| AFUA_4G10790 | Phosphoribosyl diphosphate synthase isoform 4                                                                                                                    | 2.51  | 1.61 | 3.04 | 1.23E-04 |
| AFUA_1G14400 | Hydroxyisocaproate dehydrogenase, putative (EC 1.1.1.95)                                                                                                         | 0.68  | 1.61 | 2.50 | 7.64E-03 |
| AFUA_1G04540 | NADH-cytochrome b5 reductase 2 (EC 1.6.2.2) (Mitochondrial cytochrome b reductase)                                                                               | 1.81  | 1.61 | 2.16 | 3.37E-06 |
| AFUA_1G01750 | Peptidyl-prolyl cis-trans isomerase, putative (EC 5.2.1.8)                                                                                                       | 0.38  | 1.61 | 1.81 | 1.91E-02 |
| AFUA_8G01100 | Melibiose subfamily, putative (EC 3.2.1.22)                                                                                                                      | 1.22  | 1.62 | 2.77 | 4.36E-04 |
| AFUA_1G04950 | Serine/threonine-protein phosphatase (EC 3.1.3.16)                                                                                                               | 2.33  | 1.62 | 1.22 | 3.67E-08 |
| AFUA_4G04410 | 3-hydroxybutyryl-CoA dehydrogenase, putative (EC 1.1.1.157)                                                                                                      | 1.54  | 1.62 | 1.58 | 8.61E-05 |
| AFUA_5G03770 | Lipase, putative (EC 3.1.1.3)                                                                                                                                    | 1.66  | 1.62 | 2.66 | 1.25E-03 |
| AFUA_8G04550 | Sulfonate biosynthesis enzyme, putative (EC 4.4.1.-)                                                                                                             | 0.80  | 1.63 | 1.86 | 3.19E-02 |
| AFUA_6G12580 | Anthranilate synthase component I, putative (EC 4.1.3.27)                                                                                                        | 1.37  | 1.63 | 2.21 | 2.10E-07 |
| AFUA_5G06680 | 4-aminobutyrate transaminase GatA (EC 2.6.1.19)                                                                                                                  | 1.48  | 1.64 | 1.32 | 1.25E-07 |
| AFUA_6G10480 | Peptidyl-prolyl cis-trans isomerase-like 3 (PPIase) (EC 5.2.1.8) (Rotamase)                                                                                      | 2.18  | 1.64 | 2.28 | 4.96E-03 |
| AFUA_2G13295 | Aminotransferase family protein (LoIT), putative                                                                                                                 | 3.15  | 1.64 | 1.91 | 1.90E-03 |
| AFUA_1G09660 | Mitochondrial 2-oxodicarboxylate carrier protein, putative                                                                                                       | 3.45  | 1.64 | 2.72 | 2.28E-05 |
| AFUA_5G06010 | Eukaryotic translation initiation factor 6 (eIF-6)                                                                                                               | 2.53  | 1.64 | 2.91 | 2.74E-04 |
| AFUA_4G07690 | Phosphoribosylaminoimidazolecarboxamide formyltransferase/IMP cyclohydrolase                                                                                     | 0.20  | 1.65 | 2.06 | 7.82E-08 |
| AFUA_3G06890 | RRM domain protein                                                                                                                                               | 2.15  | 1.66 | 1.07 | 3.71E-04 |
| AFUA_1G11480 | Uncharacterized protein                                                                                                                                          | 1.60  | 1.67 | 0.73 | 7.90E-05 |
| AFUA_4G07610 | Zinc metalloprotease, putative                                                                                                                                   | 2.02  | 1.67 | 0.28 | 2.41E-07 |
| AFUA_3G14690 | Aminotransferase, putative (EC 2.-.-)                                                                                                                            | 3.71  | 1.68 | 2.25 | 1.24E-02 |
| AFUA_1G14850 | Acyl-CoA dehydrogenase, putative (EC 1.3.99.-)                                                                                                                   | 2.04  | 1.69 | 1.34 | 2.97E-10 |
| AFUA_1G13710 | Isoleucyl-tRNA synthetase, cytoplasmic (EC 6.1.1.5)                                                                                                              | 1.43  | 1.69 | 2.43 | 1.72E-06 |
| AFUA_3G13450 | Oxidoreductase, short chain dehydrogenase/reductase family superfamily (EC 1.1.1.100)                                                                            | 0.99  | 1.69 | 2.13 | 5.97E-03 |
| AFUA_4G08710 | Short chain dehydrogenase, putative (EC 1.-.-)                                                                                                                   | 1.52  | 1.69 | 1.11 | 1.14E-08 |
| AFUA_5G10370 | Succinate dehydrogenase [ubiquinone] iron-sulfur subunit, mitochondrial (EC 1.3.5.1)                                                                             | 1.70  | 1.70 | 1.94 | 1.61E-03 |
| AFUA_5G10280 | Oxidoreductase, acting on the CH-OH group of donors, NAD or NADP as acceptor (EC 1.1.1.31)                                                                       | 1.71  | 1.70 | 1.26 | 8.32E-03 |
| AFUA_2G05790 | Dolichyl-diphosphooligosaccharide--protein glycosyltransferase subunit 1 (EC 2.4.99.18)                                                                          | 2.29  | 1.70 | 2.33 | 1.32E-09 |
| AFUA_6G11980 | Exo-beta-1,3-glucanase, putative (EC 3.2.1.58)                                                                                                                   | -0.54 | 1.70 | 0.80 | 4.83E-05 |
| AFUA_2G10520 | Uricase (EC 1.7.3.3) (Urate oxidase)                                                                                                                             | 1.22  | 1.71 | 0.55 | 9.87E-03 |
| AFUA_8G04340 | Cystathionine gamma-lyase (EC 4.4.1.8)                                                                                                                           | 2.17  | 1.72 | 2.46 | 1.22E-03 |
| AFUA_3G07810 | Succinate dehydrogenase [ubiquinone] flavoprotein subunit, mitochondrial (EC 1.3.5.1)                                                                            | 1.68  | 1.72 | 1.63 | 7.09E-11 |
| AFUA_3G11350 | ATPase get3 (EC 3.6.-.-) (Arsenical pump-driving ATPase) (Arsenite-stimulated ATPase) (Golgi to ER traffic protein 3) (Guided entry of tail-anchored proteins 3) | 2.82  | 1.72 | 3.08 | 7.97E-03 |
| AFUA_8G04710 | Xylosidase, putative (EC 3.2.1.37)                                                                                                                               | 1.81  | 1.72 | 1.89 | 6.76E-04 |
| AFUA_6G00750 | Pyruvate decarboxylase, putative (EC 4.1.1.1)                                                                                                                    | 1.60  | 1.72 | 1.26 | 4.56E-04 |
| AFUA_7G00860 | Lipoxygenase, putative (EC 1.13.11.-)                                                                                                                            | 1.05  | 1.73 | 2.86 | 2.58E-04 |
| AFUA_1G14170 | Probable beta-galactosidase A (EC 3.2.1.23) (Lactase A)                                                                                                          | 1.06  | 1.73 | 1.16 | 7.03E-03 |

|              |                                                                                                                                                                                                                           |       |      |      |          |
|--------------|---------------------------------------------------------------------------------------------------------------------------------------------------------------------------------------------------------------------------|-------|------|------|----------|
| AFUA_2G01100 | Pirin domain protein, putative                                                                                                                                                                                            | 0.33  | 1.73 | 2.73 | 9.67E-04 |
| AFUA_1G09960 | Kynurenine formamidase (KFA) (KFase) (EC 3.5.1.9)<br>(Arylformamidase) (N-formylkynurenine<br>formamidase) (FKF)                                                                                                          | 2.37  | 1.73 | 1.14 | 9.20E-03 |
| AFUA_4G12840 | Methylthioribulose-1-phosphate dehydratase (MTRu-1-<br>P dehydratase) (EC 4.2.1.109)                                                                                                                                      | 1.74  | 1.75 | 1.64 | 1.23E-03 |
| AFUA_5G12250 | Posttranscriptional regulation nuclease (Mkt1),<br>putative                                                                                                                                                               | 1.24  | 1.75 | 2.19 | 5.16E-05 |
| AFUA_6G03100 | Uncharacterized protein                                                                                                                                                                                                   | 0.36  | 1.75 | 2.23 | 7.03E-07 |
| AFUA_3G11430 | Arginase (EC 3.5.3.1)                                                                                                                                                                                                     | 0.44  | 1.75 | 2.07 | 7.83E-03 |
| AFUA_6G11210 | 3-oxoacyl-(Acyl-carrier-protein) reductase (EC<br>1.1.1.100)                                                                                                                                                              | 2.23  | 1.76 | 1.69 | 1.86E-05 |
| AFUA_6G10600 | NEDD8-activating enzyme E1 regulatory subunit                                                                                                                                                                             | 2.06  | 1.76 | 2.38 | 5.36E-04 |
| AFUA_3G11640 | Homoserine dehydrogenase (HDH) (EC 1.1.1.3)                                                                                                                                                                               | -0.21 | 1.76 | 2.09 | 2.66E-06 |
| AFUA_1G11120 | Uncharacterized protein                                                                                                                                                                                                   | 2.27  | 1.76 | 2.14 | 5.04E-03 |
| AFUA_1G08980 | UPF0160 domain protein MYG1, putative                                                                                                                                                                                     | 1.65  | 1.77 | 1.65 | 1.28E-08 |
| AFUA_4G03120 | Mitochondrial cytochrome b2, putative (EC 1.1.2.3)                                                                                                                                                                        | 1.81  | 1.78 | 1.94 | 1.46E-05 |
| AFUA_6G00260 | Phosphatidylserine decarboxylase family protein (EC<br>4.1.1.-)                                                                                                                                                           | 1.42  | 1.79 | 1.02 | 3.32E-05 |
| AFUA_2G16880 | 60S ribosomal protein L37a                                                                                                                                                                                                | 0.96  | 1.79 | 4.84 | 7.06E-07 |
| AFUA_1G14570 | Histidine biosynthesis trifunctional protein [Includes:<br>Phosphoribosyl-AMP cyclohydrolase (EC 3.5.4.19);<br>Phosphoribosyl-ATP pyrophosphohydrolase (EC<br>3.6.1.31); Histidinol dehydrogenase (HDH) (EC<br>1.1.1.23)] | 1.38  | 1.80 | 1.44 | 5.84E-08 |
| AFUA_6G10980 | UV-damaged DNA binding protein, putative                                                                                                                                                                                  | 1.06  | 1.81 | 3.04 | 6.09E-05 |
| AFUA_7G01880 | Nicotinate phosphoribosyltransferase (EC 6.3.4.21)                                                                                                                                                                        | -0.48 | 1.81 | 1.87 | 8.56E-04 |
| AFUA_7G00360 | UDP-galactose 4-epimerase, putative (EC 5.1.3.-)                                                                                                                                                                          | 2.71  | 1.81 | 2.62 | 5.05E-08 |
| AFUA_5G12210 | G protein complex beta subunit SfaD                                                                                                                                                                                       | 2.36  | 1.81 | 2.92 | 7.28E-07 |
| AFUA_4G04680 | FGGY-family carbohydrate kinase, putative                                                                                                                                                                                 | 0.81  | 1.82 | 2.61 | 1.73E-05 |
| AFUA_5G09080 | Transcription factor (SPT8), putative                                                                                                                                                                                     | 0.93  | 1.83 | 2.21 | 1.87E-02 |
| AFUA_4G07710 | Pyruvate carboxylase (EC 6.4.1.1)                                                                                                                                                                                         | 1.40  | 1.84 | 2.74 | 9.52E-08 |
| AFUA_8G04810 | Casein kinase, putative (EC 2.7.11.1)                                                                                                                                                                                     | 1.23  | 1.84 | 1.89 | 4.01E-02 |
| AFUA_5G06500 | Acyl-CoA dehydrogenase family protein (EC 1.3.99.-)                                                                                                                                                                       | 2.25  | 1.85 | 1.96 | 8.24E-05 |
| AFUA_2G01920 | Glutaminyl-tRNA synthetase (EC 6.1.1.18)                                                                                                                                                                                  | 2.64  | 1.85 | 0.95 | 1.34E-05 |
| AFUA_4G11050 | NADH dehydrogenase [ubiquinone] flavoprotein 1,<br>mitochondrial (EC 1.6.5.3) (EC 1.6.99.3)                                                                                                                               | 1.96  | 1.85 | 3.19 | 1.70E-06 |
| AFUA_7G00350 | Uncharacterized protein                                                                                                                                                                                                   | 0.62  | 1.86 | 2.15 | 3.63E-03 |
| AFUA_4G14520 | Monoxygenase tpcG (EC 1.-.-) (Trypacidin<br>synthesis protein G)                                                                                                                                                          | 1.55  | 1.86 | 3.24 | 4.15E-05 |
| AFUA_6G06460 | Fumarylacetoacetate hydrolase family protein                                                                                                                                                                              | 1.77  | 1.86 | 1.92 | 9.09E-05 |
| AFUA_2G00590 | Glutathione S-transferase, putative (EC 2.5.1.18)                                                                                                                                                                         | 2.81  | 1.86 | 2.26 | 1.59E-03 |
| AFUA_6G00370 | Aminotransferase, putative                                                                                                                                                                                                | 1.40  | 1.87 | 0.59 | 1.39E-03 |
| AFUA_7G01920 | DNA-directed RNA polymerase subunit beta (EC<br>2.7.7.6)                                                                                                                                                                  | 2.37  | 1.88 | 2.91 | 1.36E-04 |
| AFUA_6G12930 | Aconitate hydratase, mitochondrial (Aconitase) (EC<br>4.2.1.3) (Citrate hydro-lyase) (Homocitrate<br>dehydratase) (EC 4.2.1.-)                                                                                            | 1.16  | 1.88 | 3.20 | 6.24E-07 |
| AFUA_3G00370 | Phosphoketolase, putative (EC 4.1.2.-)                                                                                                                                                                                    | 0.51  | 1.88 | 2.84 | 3.50E-05 |
| AFUA_2G10220 | Glycerol dehydrogenase, putative (EC 1.1.1.-)                                                                                                                                                                             | 2.11  | 1.89 | 1.74 | 2.26E-05 |
| AFUA_2G11150 | Rab GDP dissociation inhibitor                                                                                                                                                                                            | 1.18  | 1.90 | 2.40 | 1.79E-04 |
| AFUA_6G12250 | Succinyl-CoA:3-ketoacid-coenzyme A transferase (EC<br>2.8.3.5)                                                                                                                                                            | 1.20  | 1.90 | 1.74 | 1.35E-02 |
| AFUA_2G14030 | Arginyl-tRNA synthetase (EC 6.1.1.19)                                                                                                                                                                                     | 0.35  | 1.91 | 2.08 | 2.78E-07 |
| AFUA_6G10660 | ATP citrate lyase subunit (Acl), putative (EC 6.2.1.5)                                                                                                                                                                    | 0.19  | 1.91 | 2.65 | 1.23E-04 |
| AFUA_6G05090 | RNA polymerase II Elongator subunit, putative                                                                                                                                                                             | -0.19 | 1.92 | 2.79 | 3.47E-03 |
| AFUA_6G02470 | Fumarate hydratase, putative (EC 4.2.1.2)                                                                                                                                                                                 | 1.78  | 1.92 | 2.06 | 3.59E-06 |
| AFUA_1G09230 | DUF1000 domain protein                                                                                                                                                                                                    | 2.18  | 1.93 | 2.15 | 2.28E-04 |
| AFUA_1G10460 | Uncharacterized protein                                                                                                                                                                                                   | 2.27  | 1.93 | 1.73 | 9.81E-03 |
| AFUA_3G11710 | Saccharopine dehydrogenase [NAD(+), L-lysine-<br>forming] (SDH) (EC 1.5.1.7) (Lysine--2-oxoglutarate<br>reductase)                                                                                                        | 1.46  | 1.93 | 2.62 | 3.46E-05 |
| AFUA_3G12560 | Allantoicase Alc, putative (EC 3.5.3.4)                                                                                                                                                                                   | -0.32 | 1.93 | 2.50 | 3.74E-05 |
| AFUA_5G09450 | Isoflavone reductase family protein (EC 1.3.1.-)                                                                                                                                                                          | 1.60  | 1.94 | 2.92 | 3.41E-05 |
| AFUA_2G14470 | Oxidoreductase, FAD-binding, putative                                                                                                                                                                                     | 1.08  | 1.94 | 1.01 | 1.21E-04 |

|              |                                                                                                 |       |      |      |          |
|--------------|-------------------------------------------------------------------------------------------------|-------|------|------|----------|
| AFUA_5G08930 | Isovaleryl-CoA dehydrogenase IvdA, putative (EC 1.3.8.4)                                        | 2.35  | 1.94 | 1.59 | 6.38E-07 |
| AFUA_2G05740 | Rho GTPase ModA, putative                                                                       | 2.65  | 1.95 | 2.38 | 1.24E-03 |
| AFUA_5G03360 | NADH pyrophosphatase, putative (EC 3.6.1.-)                                                     | 2.39  | 1.95 | 2.29 | 1.45E-02 |
| AFUA_5G12840 | Hydroxyacylglutathione hydrolase, putative (EC 3.1.2.6)                                         | 1.91  | 1.96 | 1.58 | 2.01E-09 |
| AFUA_2G13630 | Aromatic aminotransferase Aro8, putative (EC 2.6.1.-)                                           | 3.08  | 1.96 | 1.61 | 7.87E-04 |
| AFUA_2G17560 | Hydroxynaphthalene reductase arp2 (EC 1.1.-.-)<br>(Conidial pigment biosynthesis oxidase arp2)  | 1.38  | 1.98 | 2.22 | 3.81E-07 |
| AFUA_2G12450 | Hydroxymethylglutaryl-CoA lyase (EC 4.1.3.4)                                                    | 2.07  | 1.98 | 1.96 | 1.61E-05 |
| AFUA_6G12950 | Trehalose-6-phosphate synthase (EC 2.4.1.15) (UDP-glucose-glucosephosphate glucosyltransferase) | 3.01  | 1.98 | 3.52 | 7.43E-05 |
| AFUA_4G13700 | Threonyl-tRNA synthetase, putative (EC 6.1.1.3)                                                 | 2.15  | 1.98 | 2.27 | 1.50E-05 |
| AFUA_2G00830 | Short chain dehydrogenase/reductase (EC 1.1.-.-)                                                | 2.20  | 1.98 | 1.66 | 3.87E-03 |
| AFUA_1G02140 | Glycogen debranching enzyme Gdb1, putative                                                      | 0.87  | 1.98 | 3.18 | 1.08E-03 |
| AFUA_6G02140 | Peptidyl-prolyl cis-trans isomerase-like 1 (PPIase) (EC 5.2.1.8) (Rotamase)                     | 2.26  | 1.98 | 2.33 | 3.51E-03 |
| AFUA_6G13180 | CECR1 family adenosine deaminase, putative                                                      | 1.74  | 1.99 | 2.52 | 3.02E-05 |
| AFUA_6G10650 | ATP citrate lyase, subunit 1, putative (EC 2.3.3.8)                                             | 1.30  | 2.00 | 2.76 | 3.74E-08 |
| AFUA_1G01970 | VeA-like protein                                                                                | 1.53  | 2.00 | 3.12 | 1.12E-03 |
| AFUA_2G04220 | Homogentisate 1,2-dioxygenase (HmgA), putative (EC 1.13.11.5)                                   | 2.37  | 2.00 | 1.07 | 3.81E-02 |
| AFUA_8G01670 | Catalase-peroxidase (CP) (EC 1.11.1.21) (Catalase-2) (Peroxidase/catalase)                      | 2.91  | 2.01 | 1.41 | 4.44E-09 |
| AFUA_5G09640 | Conserved fungal protein                                                                        | 1.96  | 2.01 | 1.97 | 6.03E-04 |
| AFUA_4G12850 | Calnexin homolog                                                                                | 1.94  | 2.01 | 1.68 | 1.06E-05 |
| AFUA_3G02430 | Uncharacterized protein                                                                         | 1.34  | 2.01 | 1.93 | 8.65E-07 |
| AFUA_3G04020 | Conserved mitochondrial protein                                                                 | 2.50  | 2.02 | 2.39 | 6.53E-04 |
| AFUA_1G09480 | Vacuolar protein sorting-associated protein 29                                                  | 0.98  | 2.02 | 2.31 | 3.96E-02 |
| AFUA_1G14680 | DNA-directed RNA polymerase subunit (EC 2.7.7.6)                                                | 2.25  | 2.02 | 3.38 | 4.43E-05 |
| AFUA_6G13300 | GTP-binding nuclear protein                                                                     | 2.70  | 2.02 | 2.31 | 8.90E-06 |
| AFUA_2G14850 | Enoyl-CoA hydratase/isomerase family protein (EC 4.2.-.-)                                       | 3.46  | 2.02 | 2.40 | 1.40E-04 |
| AFUA_6G13250 | 60S ribosomal protein L31e                                                                      | 1.73  | 2.03 | 4.41 | 2.79E-05 |
| AFUA_7G01320 | Beta-mannosidase B (EC 3.2.1.25) (Mannase B) (Mannase B)                                        | 1.67  | 2.03 | 1.98 | 7.67E-05 |
| AFUA_4G08170 | Succinate-semialdehyde dehydrogenase Uga2, putative (EC 1.2.1.24)                               | 1.43  | 2.03 | 2.87 | 8.68E-06 |
| AFUA_3G08310 | 4-nitrophenylphosphatase (PNPPase) (EC 3.1.3.41)                                                | 2.77  | 2.04 | 1.39 | 1.34E-02 |
| AFUA_5G09920 | Peptidase, putative (EC 3.-.-.-)                                                                | 1.81  | 2.04 | 1.63 | 2.44E-06 |
| AFUA_6G14100 | Mitochondrial carnitine:acyl carnitine carrier, putative                                        | 3.46  | 2.04 | 2.78 | 2.40E-04 |
| AFUA_4G07650 | Peptidyl-prolyl cis-trans isomerase B (PPIase B) (EC 5.2.1.8) (Rotamase B)                      | 1.62  | 2.05 | 2.52 | 4.36E-03 |
| AFUA_8G07110 | Alanyl-tRNA synthetase, putative (EC 6.1.1.7)                                                   | 1.67  | 2.06 | 2.33 | 2.91E-02 |
| AFUA_1G09930 | Glycerol dehydrogenase Gcy1, putative (EC 1.1.1.-)                                              | 1.48  | 2.06 | 2.98 | 9.11E-09 |
| AFUA_4G08600 | Aldehyde dehydrogenase, putative (EC 1.2.1.3)                                                   | 1.14  | 2.06 | 2.52 | 5.58E-06 |
| AFUA_1G13790 | Histone H3                                                                                      | 2.16  | 2.07 | 2.90 | 5.44E-05 |
| AFUA_4G13750 | Neutral protease 2 homolog AFUA_4G13750 (EC 3.4.24.39) (Deuterolysin AFUA_4G13750)              | 4.36  | 2.08 | 0.81 | 5.27E-05 |
| AFUA_5G11040 | Pantoate--beta-alanine ligase (EC 6.3.2.1)                                                      | 1.20  | 2.08 | 2.46 | 1.10E-04 |
| AFUA_4G06860 | Uncharacterized protein                                                                         | 2.13  | 2.09 | 1.49 | 1.46E-04 |
| AFUA_6G03540 | Malate synthase (EC 2.3.3.9)                                                                    | 0.38  | 2.10 | 2.16 | 1.22E-07 |
| AFUA_1G06700 | Metacaspase-1A (EC 3.4.22.-)                                                                    | 3.64  | 2.10 | 2.07 | 1.94E-03 |
| AFUA_1G02820 | NADH-quinone oxidoreductase Pst2, putative                                                      | -0.37 | 2.10 | 2.55 | 9.33E-06 |
| AFUA_6G04210 | Mannosyl-oligosaccharide glucosidase, putative                                                  | 1.32  | 2.11 | 1.78 | 2.46E-05 |
| AFUA_3G11480 | Mitochondrial methylglutaconyl-CoA hydratase (Auh), putative (EC 4.2.1.18)                      | 1.61  | 2.12 | 3.01 | 1.14E-06 |
| AFUA_8G00230 | Verruculogen synthase (EC 1.14.11.38) (Fumitremorgin biosynthesis protein F)                    | 1.49  | 2.12 | 2.00 | 2.82E-04 |
| AFUA_4G12600 | Phosphoribosyl-aminoimidazole carboxylase (EC 4.1.1.21)                                         | 2.05  | 2.13 | 2.49 | 3.52E-06 |
| AFUA_3G03020 | Phosphoglucomutase, putative                                                                    | 2.09  | 2.13 | 1.66 | 1.24E-04 |
| AFUA_5G07000 | NAD binding Rossmann fold oxidoreductase, putative (EC 1.-.-.-)                                 | 1.19  | 2.13 | 2.22 | 4.38E-07 |
| AFUA_2G07720 | Cytochrome b5, putative                                                                         | 0.33  | 2.14 | 2.11 | 2.06E-02 |

|              |                                                                                                                                         |       |      |      |          |
|--------------|-----------------------------------------------------------------------------------------------------------------------------------------|-------|------|------|----------|
| AFUA_8G01390 | Glycosyl hydrolase, putative                                                                                                            | 1.55  | 2.14 | 2.67 | 1.14E-04 |
| AFUA_3G13140 | Methyltransferase, putative                                                                                                             | 2.16  | 2.14 | 2.09 | 1.35E-03 |
| AFUA_4G06380 | Sterol carrier protein, putative                                                                                                        | 0.71  | 2.15 | 2.45 | 7.99E-07 |
| AFUA_5G13450 | Triosephosphate isomerase (EC 5.3.1.1)                                                                                                  | 2.20  | 2.15 | 1.85 | 1.15E-06 |
| AFUA_7G04180 | Amine oxidase (EC 1.4.3.-)                                                                                                              | 3.46  | 2.15 | 1.42 | 5.87E-08 |
| AFUA_4G11260 | Aldo-keto reductase, putative (EC 1.1.1.-)                                                                                              | 1.72  | 2.15 | 1.57 | 5.59E-07 |
| AFUA_5G08240 | MutT/nudix family protein                                                                                                               | 0.64  | 2.17 | 1.60 | 9.03E-05 |
| AFUA_2G12530 | Carnitine acetyl transferase                                                                                                            | 2.17  | 2.17 | 2.24 | 1.23E-05 |
| AFUA_5G11660 | Autophagy-related protein 18                                                                                                            | 2.64  | 2.18 | 2.57 | 1.54E-04 |
| AFUA_5G02030 | Cleavage and polyadenylation specific factor 5                                                                                          | 2.60  | 2.18 | 2.07 | 1.02E-06 |
| AFUA_1G11535 | Glutaredoxin-like protein                                                                                                               | 1.93  | 2.19 | 1.56 | 1.53E-03 |
| AFUA_5G10610 | Ubiquinol-cytochrome c reductase iron-sulfur subunit (EC 1.10.2.2)                                                                      | 2.21  | 2.19 | 2.15 | 3.15E-07 |
| AFUA_2G11020 | Triosephosphate isomerase (EC 5.3.1.1)                                                                                                  | 1.77  | 2.19 | 2.49 | 5.43E-05 |
| AFUA_7G05740 | Malate dehydrogenase (EC 1.1.1.37)                                                                                                      | 1.99  | 2.20 | 1.80 | 2.64E-09 |
| AFUA_1G16270 | Xylitol dehydrogenase XdhB (EC 1.1.1.14)                                                                                                | 2.08  | 2.20 | 2.82 | 1.45E-03 |
| AFUA_3G13620 | Cupin domain protein                                                                                                                    | -0.46 | 2.20 | 1.33 | 1.15E-03 |
| AFUA_2G01220 | GTP cyclohydrolase II, putative (EC 3.5.4.25)                                                                                           | 1.06  | 2.20 | 3.30 | 5.88E-03 |
| AFUA_3G10090 | Dihydroneopterin aldolase domain protein (EC 4.1.2.25)                                                                                  | 0.71  | 2.20 | 2.58 | 2.09E-05 |
| AFUA_2G03290 | 14-3-3 family protein ArtA, putative                                                                                                    | 0.67  | 2.21 | 2.82 | 1.90E-07 |
| AFUA_2G02920 | Alpha/beta hydrolase, putative (EC 3.-.-)                                                                                               | 2.26  | 2.22 | 2.18 | 4.64E-05 |
| AFUA_1G08930 | Probable cytosolic iron-sulfur protein assembly protein 1                                                                               | 2.13  | 2.22 | 3.31 | 2.02E-03 |
| AFUA_1G02090 | Quinone oxidoreductase, putative (EC 1.6.5.5)                                                                                           | 2.48  | 2.22 | 2.44 | 7.49E-06 |
| AFUA_5G10540 | Glycogen branching enzyme GbeA, putative                                                                                                | 0.91  | 2.23 | 3.06 | 1.39E-07 |
| AFUA_6G08020 | ABC transporter, putative                                                                                                               | 1.44  | 2.23 | 2.27 | 8.59E-04 |
| AFUA_6G04560 | 37S ribosomal protein S9                                                                                                                | 0.95  | 2.24 | 3.28 | 4.88E-04 |
| AFUA_5G04230 | Citrate synthase                                                                                                                        | 1.29  | 2.25 | 3.43 | 2.08E-07 |
| AFUA_2G16200 | Uracil phosphoribosyltransferase (EC 2.4.2.9)                                                                                           | 2.20  | 2.25 | 2.69 | 1.16E-02 |
| AFUA_4G10330 | CaaX farnesyltransferase beta subunit Ram1 (EC 2.5.1.58)                                                                                | 1.83  | 2.27 | 2.17 | 3.61E-04 |
| AFUA_4G13510 | Isocitrate lyase (ICL) (Isocitrate) (EC 4.1.3.1) (Methylisocitrate lyase) (MICA) (EC 4.1.3.30) (Threo-D(S)-isocitrate glyoxylate-lyase) | 1.37  | 2.27 | 3.61 | 6.63E-08 |
| AFUA_4G11840 | Glyoxylate reductase (EC 1.1.1.95)                                                                                                      | 2.33  | 2.28 | 1.99 | 1.68E-04 |
| AFUA_5G11610 | Protein arginine N-methyltransferase                                                                                                    | 1.83  | 2.28 | 1.82 | 2.99E-02 |
| AFUA_6G11680 | Thiamine pyrophosphate enzyme, putative (EC 4.1.-.-)                                                                                    | 2.47  | 2.28 | 2.39 | 5.77E-05 |
| AFUA_4G08760 | Phospho-2-dehydro-3-deoxyheptonate aldolase (EC 2.5.1.54)                                                                               | 2.94  | 2.29 | 3.14 | 1.80E-05 |
| AFUA_1G09810 | Translation machinery-associated protein 20                                                                                             | 1.30  | 2.29 | 1.98 | 1.31E-04 |
| AFUA_1G11790 | Nucleoside hydrolase, putative (EC 3.2.2.-)                                                                                             | 2.30  | 2.29 | 1.85 | 3.45E-03 |
| AFUA_4G03660 | Acid phosphatase, putative (EC 3.1.3.2)                                                                                                 | 1.73  | 2.31 | 2.00 | 1.27E-04 |
| AFUA_5G09860 | S-formylglutathione hydrolase (EC 3.1.2.12)                                                                                             | 2.85  | 2.31 | 2.46 | 8.48E-06 |
| AFUA_6G02450 | 40S ribosomal protein S30                                                                                                               | 4.38  | 2.31 | 6.33 | 5.94E-10 |
| AFUA_6G06750 | 14-3-3 family protein                                                                                                                   | 0.77  | 2.32 | 2.84 | 2.93E-06 |
| AFUA_6G07720 | Phosphoenolpyruvate carboxykinase AcuF (EC 4.1.1.49)                                                                                    | 2.81  | 2.33 | 2.72 | 2.44E-07 |
| AFUA_7G05160 | Fumarylacetoacetate hydrolase family protein                                                                                            | 2.01  | 2.33 | 1.56 | 1.16E-02 |
| AFUA_8G01210 | Enoyl-CoA hydratase/isomerase family protein (EC 4.2.1.17)                                                                              | -0.38 | 2.33 | 2.05 | 5.72E-03 |
| AFUA_7G05930 | Metallopeptidase MepB (EC 3.4.24.-)                                                                                                     | 2.34  | 2.35 | 2.22 | 4.82E-07 |
| AFUA_3G11280 | Class V chitinase, putative (EC 3.2.1.14)                                                                                               | 2.73  | 2.36 | 1.80 | 8.28E-08 |
| AFUA_8G04090 | Choline oxidase (CodA), putative (EC 1.1.3.17)                                                                                          | 2.82  | 2.36 | 2.08 | 1.64E-08 |
| AFUA_2G13860 | Histone H4                                                                                                                              | 2.56  | 2.36 | 2.68 | 1.57E-07 |
| AFUA_5G03520 | Uncharacterized protein                                                                                                                 | 2.15  | 2.36 | 2.43 | 6.41E-07 |
| AFUA_4G03830 | Uncharacterized protein                                                                                                                 | -0.22 | 2.36 | 1.14 | 2.55E-05 |
| AFUA_2G08970 | Thiamine biosynthetic bifunctional enzyme, putative                                                                                     | 2.41  | 2.37 | 2.22 | 1.51E-05 |
| AFUA_7G02070 | AIF-like mitochondrial oxidoreductase (Nfrl), putative                                                                                  | 0.65  | 2.37 | 2.52 | 2.26E-08 |
| AFUA_2G02950 | Aldehyde reductase, putative (EC 1.1.1.-)                                                                                               | 2.75  | 2.40 | 1.93 | 5.49E-06 |
| AFUA_4G07150 | Cytochrome c subunit, putative                                                                                                          | 3.45  | 2.41 | 2.78 | 1.10E-06 |
| AFUA_6G14460 | Haloalkanoic acid dehalogenase, putative (EC 3.8.1.-)                                                                                   | 2.32  | 2.41 | 1.77 | 6.44E-05 |
| AFUA_7G01000 | Aldehyde dehydrogenase, putative (EC 1.2.1.3)                                                                                           | 2.92  | 2.41 | 2.24 | 6.42E-09 |

|              |                                                                                                 |      |      |      |          |
|--------------|-------------------------------------------------------------------------------------------------|------|------|------|----------|
| AFUA_3G12100 | Trehalose synthase (Ccg-9), putative (EC 2.4.1.-)                                               | 2.57 | 2.42 | 2.69 | 2.04E-05 |
| AFUA_3G02240 | Aromatic-L-amino-acid decarboxylase, putative (EC 4.1.1.28)                                     | 2.24 | 2.44 | 1.68 | 7.17E-05 |
| AFUA_6G07710 | Mitochondrial dicarboxylate carrier protein, putative                                           | 2.77 | 2.44 | 2.24 | 4.59E-03 |
| AFUA_3G06760 | 60S ribosomal protein L37                                                                       | 2.46 | 2.44 | 5.25 | 9.40E-06 |
| AFUA_7G02280 | U5 snRNP complex subunit, putative                                                              | 2.93 | 2.45 | 2.59 | 8.28E-03 |
| AFUA_2G10660 | Mannitol-1-phosphate 5-dehydrogenase (MIPDH) (MPD) (MPDH) (EC 1.1.1.17)                         | 2.25 | 2.46 | 2.14 | 2.73E-08 |
| AFUA_3G07790 | Argininosuccinate lyase (EC 4.3.2.1)                                                            | 2.64 | 2.47 | 2.26 | 6.17E-07 |
| AFUA_5G09400 | Carbonyl reductase, putative (EC 1.-.-.-)                                                       | 2.11 | 2.49 | 2.20 | 2.04E-04 |
| AFUA_5G13510 | Cell cycle control protein (Cwf8), putative                                                     | 3.40 | 2.49 | 2.22 | 1.58E-06 |
| AFUA_2G17580 | Scytalone dehydratase arp1 (EC 4.2.1.94) (Conidial pigment biosynthesis oxidase arp1)           | 0.58 | 2.49 | 2.69 | 2.24E-07 |
| AFUA_2G00967 | Cupin domain protein                                                                            | 2.11 | 2.50 | 0.92 | 4.17E-03 |
| AFUA_4G12870 | Methylmalonate-semialdehyde dehydrogenase, putative (EC 1.2.1.27)                               | 2.43 | 2.51 | 2.47 | 1.72E-06 |
| AFUA_7G04540 | Short chain dehydrogenase/reductase family (EC 1.1.1.69)                                        | 0.87 | 2.53 | 2.98 | 2.26E-07 |
| AFUA_5G11430 | Quinone oxidoreductase, putative (EC 1.6.5.5)                                                   | 0.95 | 2.55 | 2.51 | 1.45E-09 |
| AFUA_3G12690 | Uncharacterized protein                                                                         | 2.09 | 2.55 | 2.09 | 4.39E-10 |
| AFUA_2G15430 | Sorbitol/xylulose reductase Sou1-like, putative (EC 1.-.-.-)                                    | 1.75 | 2.56 | 2.72 | 6.09E-04 |
| AFUA_2G03720 | Peptidyl-prolyl cis-trans isomerase (PPIase) (EC 5.2.1.8)                                       | 2.37 | 2.56 | 2.42 | 3.59E-07 |
| AFUA_5G07170 | Nucleoside-diphosphate-sugar epimerase, putative                                                | 2.32 | 2.57 | 2.32 | 5.15E-03 |
| AFUA_3G06880 | Sorting nexin-3                                                                                 | 2.81 | 2.58 | 3.46 | 3.16E-04 |
| AFUA_2G17920 | Uncharacterized protein                                                                         | 2.15 | 2.58 | 2.12 | 1.62E-06 |
| AFUA_6G11620 | Formyltetrahydrofolate deformylase, putative (EC 3.5.1.10)                                      | 2.40 | 2.58 | 3.40 | 1.24E-06 |
| AFUA_2G02580 | HAD superfamily hydrolase, putative                                                             | 2.74 | 2.58 | 2.37 | 2.41E-05 |
| AFUA_4G14470 | Probable decarboxylase tpcK (EC 1.-.-.-) (Trypacidin synthesis protein K)                       | 0.27 | 2.58 | 2.17 | 3.04E-03 |
| AFUA_2G04520 | Fe-containing alcohol dehydrogenase, putative (EC 1.1.1.-)                                      | 1.84 | 2.61 | 2.46 | 2.08E-05 |
| AFUA_6G10900 | UV-endonuclease UVE-1                                                                           | 1.70 | 2.63 | 2.73 | 1.88E-03 |
| AFUA_2G07350 | Gamma-glutamyl phosphate reductase (EC 1.2.1.41)                                                | 2.50 | 2.64 | 2.93 | 1.11E-04 |
| AFUA_6G03730 | 2-methylcitrate dehydratase, putative (EC 4.2.1.79)                                             | 2.67 | 2.66 | 3.38 | 1.01E-06 |
| AFUA_5G01440 | Allergen, putative (EC 1.-.-.-)                                                                 | 2.60 | 2.66 | 2.59 | 2.39E-07 |
| AFUA_3G06070 | Histone H1                                                                                      | 2.55 | 2.66 | 3.86 | 1.66E-05 |
| AFUA_4G07050 | L-lactate dehydrogenase (EC 1.13.12.4)                                                          | 2.73 | 2.66 | 2.52 | 2.06E-06 |
| AFUA_6G02370 | Actin-related protein 2/3 complex subunit 4                                                     | 3.24 | 2.67 | 3.19 | 5.22E-06 |
| AFUA_3G10310 | Acetolactate synthase (EC 2.2.1.6)                                                              | 1.11 | 2.68 | 2.31 | 4.10E-07 |
| AFUA_3G05360 | Histone H2A                                                                                     | 1.50 | 2.69 | 3.49 | 3.10E-05 |
| AFUA_4G10920 | Uncharacterized protein                                                                         | 3.76 | 2.69 | 2.97 | 4.54E-05 |
| AFUA_6G07770 | Alanine aminotransferase, putative (EC 2.6.1.-)                                                 | 2.58 | 2.69 | 2.13 | 3.86E-08 |
| AFUA_1G14710 | Beta-glucosidase, putative                                                                      | 1.63 | 2.70 | 3.52 | 4.34E-05 |
| AFUA_7G02470 | mRNA processing protein (Mss51), putative                                                       | 1.86 | 2.70 | 3.53 | 1.59E-03 |
| AFUA_4G00610 | Aryl-alcohol dehydrogenase, putative (EC 1.1.-.-)                                               | 1.62 | 2.71 | 2.45 | 1.28E-03 |
| AFUA_3G11690 | Fructose-bisphosphate aldolase, class II (EC 4.1.2.13)                                          | 2.85 | 2.74 | 2.40 | 1.96E-10 |
| AFUA_4G08410 | Mannose-6-phosphate isomerase, class I (EC 5.3.1.8)                                             | 1.96 | 2.75 | 1.97 | 8.29E-06 |
| AFUA_5G02530 | Ribokinase (EC 2.7.1.15)                                                                        | 1.86 | 2.75 | 2.17 | 6.59E-05 |
| AFUA_1G15450 | Adenylosuccinate synthetase (AMPSase) (AdSS) (EC 6.3.4.4) (IMP--aspartate ligase)               | 2.78 | 2.76 | 2.28 | 2.20E-10 |
| AFUA_1G13280 | Mannose-6-phosphate isomerase (EC 5.3.1.8) (Phosphohexomutase) (Phosphomannose isomerase) (PMI) | 2.00 | 2.77 | 2.85 | 5.16E-06 |
| AFUA_1G12920 | Alpha-1,4 glucan phosphorylase (EC 2.4.1.1)                                                     | 2.31 | 2.77 | 2.48 | 3.21E-07 |
| AFUA_5G03330 | HypA-like protein, putative                                                                     | 3.28 | 2.78 | 3.08 | 2.01E-05 |
| AFUA_6G02860 | Isocitrate lyase (EC 4.1.3.1)                                                                   | 2.62 | 2.79 | 2.62 | 3.59E-07 |
| AFUA_4G08330 | Aspartyl-tRNA synthetase, putative (EC 6.1.1.12)                                                | 2.81 | 2.80 | 3.60 | 1.77E-06 |
| AFUA_5G01290 | Zinc-binding oxidoreductase, putative (EC 1.-.-.-)                                              | 2.61 | 2.82 | 2.74 | 3.61E-04 |
| AFUA_5G09680 | Succinate dehydrogenase cytochrome b560 subunit (EC 1.3.5.1)                                    | 4.04 | 2.82 | 3.57 | 1.28E-05 |
| AFUA_3G08380 | Inorganic diphosphatase, putative (EC 3.6.1.1)                                                  | 2.61 | 2.82 | 2.44 | 1.92E-10 |
| AFUA_4G11730 | Glycerol dehydrogenase (GldB), putative (EC 1.1.1.72)                                           | 1.29 | 2.83 | 3.70 | 5.34E-07 |

|              |                                                                                                           |       |      |       |          |
|--------------|-----------------------------------------------------------------------------------------------------------|-------|------|-------|----------|
| AFUA_6G12870 | Iron-sulfur clusters transporter atm1, mitochondrial                                                      | 4.78  | 2.84 | 4.54  | 4.29E-04 |
| AFUA_4G04300 | Alanine racemase family protein, putative                                                                 | 0.78  | 2.85 | 3.24  | 3.63E-04 |
| AFUA_4G06140 | Dipeptidyl peptidase 3 (EC 3.4.14.4) (Dipeptidyl aminopeptidase III) (Dipeptidyl peptidase III)           | 2.72  | 2.86 | 2.43  | 1.13E-06 |
| AFUA_5G08290 | Aldo-keto reductase, putative (EC 1.1.1.-)                                                                | 2.60  | 2.88 | 2.20  | 4.21E-05 |
| AFUA_6G13410 | Pre-mRNA-splicing factor rse1                                                                             | 2.20  | 2.89 | 2.76  | 1.49E-09 |
| AFUA_6G11430 | Aldehyde dehydrogenase AldA, putative (EC 1.2.1.3)                                                        | 2.11  | 2.91 | 2.59  | 4.34E-10 |
| AFUA_2G17070 | Defective in cullin neddylation protein                                                                   | 3.34  | 2.92 | 2.04  | 2.08E-03 |
| AFUA_1G10150 | Uncharacterized protein                                                                                   | 3.69  | 2.92 | 3.83  | 2.18E-05 |
| AFUA_3G02370 | Short-chain dehydrogenase/reductase, putative (EC 1.-.-.)                                                 | 2.77  | 2.92 | 3.87  | 7.65E-07 |
| AFUA_8G00430 | Uncharacterized protein                                                                                   | 4.49  | 2.93 | 1.05  | 9.95E-07 |
| AFUA_4G14580 | O-methyltransferase tpcA (EC 2.1.1.-) (Trypacidin synthesis protein A)                                    | -0.14 | 2.95 | 3.06  | 6.77E-07 |
| AFUA_1G06240 | Riboflavin synthase, alpha subunit (EC 2.5.1.9)                                                           | 2.97  | 2.97 | 2.47  | 1.10E-04 |
| AFUA_8G04080 | Betaine aldehyde dehydrogenase (BadH), putative (EC 1.2.1.8)                                              | 2.84  | 3.00 | 2.50  | 1.85E-06 |
| AFUA_3G00590 | Asp-hemolysin (Asp-HS)                                                                                    | 0.00  | 3.01 | 3.24  | 7.48E-09 |
| AFUA_6G09570 | Uncharacterized protein                                                                                   | -0.28 | 3.02 | 1.48  | 3.50E-04 |
| AFUA_4G14530 | Glutathione S-transferase-like protein tpcF (EC 2.5.1.-) (Trypacidin synthesis protein E)                 | 0.83  | 3.02 | 2.46  | 2.76E-06 |
| AFUA_2G06040 | Actin cortical patch component, putative                                                                  | 3.11  | 3.03 | 2.43  | 5.46E-09 |
| AFUA_1G09750 | Aldehyde reductase (AKR1), putative (EC 1.1.1.2)                                                          | 1.78  | 3.04 | 3.54  | 1.03E-08 |
| AFUA_3G08470 | Glucose-6-phosphate 1-dehydrogenase (EC 1.1.1.49)                                                         | 1.41  | 3.06 | 3.33  | 8.66E-07 |
| AFUA_2G04320 | NADH-dependent flavin oxidoreductase, putative (EC 1.-.-.)                                                | 2.88  | 3.06 | 3.15  | 6.48E-11 |
| AFUA_1G15610 | Oxidoreductase, zinc-binding dehydrogenase family, putative (EC 1.3.1.-)                                  | 3.27  | 3.06 | 3.36  | 9.47E-09 |
| AFUA_1G10780 | Aminomethyltransferase (EC 2.1.2.10) (Glycine cleavage system T protein)                                  | 2.19  | 3.06 | 2.90  | 4.94E-05 |
| AFUA_3G12950 | FAD binding domain protein (EC 1.5.3.-)                                                                   | 2.95  | 3.08 | 1.33  | 2.34E-02 |
| AFUA_7G02550 | Probable D-xylulose reductase A (EC 1.1.1.9) (Xylitol dehydrogenase A)                                    | 2.11  | 3.08 | 3.00  | 2.95E-08 |
| AFUA_6G00770 | Probable arabinan endo-1,5-alpha-L-arabinosidase C (EC 3.2.1.99) (Endo-1,5-alpha-L-arabinanase C) (ABN C) | 3.60  | 3.10 | 2.44  | 3.91E-04 |
| AFUA_7G05015 | Glyoxalase family protein                                                                                 | 3.23  | 3.11 | 3.23  | 5.16E-06 |
| AFUA_5G04330 | Aminopeptidase (EC 3.4.11.-)                                                                              | 3.23  | 3.14 | 2.91  | 1.04E-09 |
| AFUA_4G11540 | Glycerol kinase, putative (EC 2.7.1.30)                                                                   | 1.52  | 3.18 | 2.94  | 5.99E-05 |
| AFUA_1G13500 | Transketolase (EC 2.2.1.1)                                                                                | 2.21  | 3.24 | 3.23  | 5.10E-09 |
| AFUA_6G10260 | Aldehyde reductase (AKR1), putative (EC 1.1.1.2)                                                          | 3.26  | 3.25 | 2.95  | 3.81E-11 |
| AFUA_5G08270 | HAD superfamily hydrolase, putative                                                                       | 3.17  | 3.28 | 2.43  | 1.08E-07 |
| AFUA_2G09030 | Dipeptidyl-peptidase 5 (EC 3.4.14.-) (Dipeptidyl-peptidase V) (DPP V) (DppV)                              | 2.08  | 3.28 | 1.89  | 1.63E-07 |
| AFUA_4G05870 | Oxidoreductase, short-chain dehydrogenase/reductase family                                                | 3.37  | 3.29 | 2.83  | 6.10E-06 |
| AFUA_3G07430 | Peptidyl-prolyl cis-trans isomerase (PPIase) (EC 5.2.1.8)                                                 | 3.12  | 3.35 | 2.98  | 9.92E-09 |
| AFUA_3G14270 | Aldo-keto reductase (AKR), putative (EC 1.1.1.-)                                                          | 3.85  | 3.37 | 3.39  | 1.19E-04 |
| AFUA_3G11070 | Pyruvate decarboxylase (EC 4.1.1.1)                                                                       | 1.95  | 3.42 | 3.43  | 9.50E-08 |
| AFUA_3G09320 | Serine hydroxymethyltransferase (EC 2.1.2.1)                                                              | 2.34  | 3.63 | 2.46  | 2.26E-10 |
| AFUA_4G07190 | Ornithine carbamoyltransferase (EC 2.1.3.3)                                                               | 2.47  | 3.65 | 3.07  | 6.27E-08 |
| AFUA_2G09790 | Glucose-6-phosphate isomerase (EC 5.3.1.9)                                                                | 3.53  | 3.67 | 3.45  | 1.95E-08 |
| AFUA_3G00280 | Metallo-beta-lactamase domain protein, putative                                                           | 2.26  | 3.78 | 3.75  | 5.18E-04 |
| AFUA_8G01780 | Nitrilase, putative                                                                                       | 1.52  | 3.82 | -0.30 | 4.70E-06 |
| AFUA_5G08290 | Aldo-keto reductase, putative (EC 1.1.1.-)                                                                | 2.60  | 2.88 | 2.20  | 4.21E-05 |
| AFUA_5G01290 | Zinc-binding oxidoreductase, putative (EC 1.-.-.)                                                         | 2.61  | 2.82 | 2.74  | 3.61E-04 |
| AFUA_3G08380 | Inorganic diphosphatase, putative (EC 3.6.1.1)                                                            | 2.61  | 2.82 | 2.44  | 1.92E-10 |
| AFUA_6G02860 | Isocitrate lyase (EC 4.1.3.1)                                                                             | 2.62  | 2.79 | 2.62  | 3.59E-07 |
| AFUA_3G10970 | Protein-tyrosine phosphatase 2 (EC 3.1.3.48)                                                              | 2.63  | 1.09 | 2.48  | 3.79E-02 |
| AFUA_1G03400 | Protein transport protein sec23                                                                           | 2.63  | 0.89 | 2.28  | 5.12E-05 |
| AFUA_5G02040 | Extracellular lipase, putative (EC 3.1.1.3)                                                               | 2.64  | 0.62 | -0.46 | 1.14E-06 |
| AFUA_3G07790 | Argininosuccinate lyase (EC 4.3.2.1)                                                                      | 2.64  | 2.47 | 2.26  | 6.17E-07 |
| AFUA_2G01920 | Glutaminyl-tRNA synthetase (EC 6.1.1.18)                                                                  | 2.64  | 1.85 | 0.95  | 1.34E-05 |
| AFUA_5G11660 | Autophagy-related protein 18                                                                              | 2.64  | 2.18 | 2.57  | 1.54E-04 |
| AFUA_3G06960 | 60S ribosomal protein L21, putative                                                                       | 2.65  | 0.47 | 3.65  | 3.25E-05 |



|              |                                                                                                                                                                  |      |      |       |          |
|--------------|------------------------------------------------------------------------------------------------------------------------------------------------------------------|------|------|-------|----------|
| AFUA_2G05740 | Rho GTPase ModA, putative                                                                                                                                        | 2.65 | 1.95 | 2.38  | 1.24E-03 |
| AFUA_6G03730 | 2-methylcitrate dehydratase, putative (EC 4.2.1.79)                                                                                                              | 2.67 | 2.66 | 3.38  | 1.01E-06 |
| AFUA_1G04130 | FG-GAP repeat protein, putative                                                                                                                                  | 2.68 | 0.75 | -0.63 | 2.94E-06 |
| AFUA_6G13300 | GTP-binding nuclear protein                                                                                                                                      | 2.70 | 2.02 | 2.31  | 8.90E-06 |
| AFUA_7G00360 | UDP-galactose 4-epimerase, putative (EC 5.1.3.-)                                                                                                                 | 2.71 | 1.81 | 2.62  | 5.05E-08 |
| AFUA_4G06140 | Dipeptidyl peptidase 3 (EC 3.4.14.4) (Dipeptidyl aminopeptidase III) (Dipeptidyl peptidase III)                                                                  | 2.72 | 2.86 | 2.43  | 1.13E-06 |
| AFUA_4G07050 | L-lactate dehydrogenase (EC 1.13.12.4)                                                                                                                           | 2.73 | 2.66 | 2.52  | 2.06E-06 |
| AFUA_3G11280 | Class V chitinase, putative (EC 3.2.1.14)                                                                                                                        | 2.73 | 2.36 | 1.80  | 8.28E-08 |
| AFUA_2G02580 | HAD superfamily hydrolase, putative                                                                                                                              | 2.74 | 2.58 | 2.37  | 2.41E-05 |
| AFUA_2G02950 | Aldehyde reductase, putative (EC 1.1.1.-)                                                                                                                        | 2.75 | 2.40 | 1.93  | 5.49E-06 |
| AFUA_3G06970 | 40S ribosomal protein S9                                                                                                                                         | 2.75 | 0.77 | 3.13  | 2.34E-07 |
| AFUA_1G15860 | Coatomer subunit delta, putative                                                                                                                                 | 2.76 | 0.78 | 2.06  | 8.40E-04 |
| AFUA_3G02370 | Short-chain dehydrogenase/reductase, putative (EC 1.-.-)                                                                                                         | 2.77 | 2.92 | 3.87  | 7.65E-07 |
| AFUA_6G07710 | Mitochondrial dicarboxylate carrier protein, putative                                                                                                            | 2.77 | 2.44 | 2.24  | 4.59E-03 |
| AFUA_5G02300 | Peroxidase, putative (EC 1.11.1.-)                                                                                                                               | 2.77 | 1.19 | 1.51  | 2.77E-05 |
| AFUA_3G08310 | 4-nitrophenylphosphatase (PNPPase) (EC 3.1.3.41)                                                                                                                 | 2.77 | 2.04 | 1.39  | 1.34E-02 |
| AFUA_1G15450 | Adenylosuccinate synthetase (AMPSase) (AdSS) (EC 6.3.4.4) (IMP--aspartate ligase)                                                                                | 2.78 | 2.76 | 2.28  | 2.20E-10 |
| AFUA_4G10760 | Steroid alpha reductase family protein                                                                                                                           | 2.80 | 0.90 | 1.55  | 7.90E-06 |
| AFUA_4G08330 | Aspartyl-tRNA synthetase, putative (EC 6.1.1.12)                                                                                                                 | 2.81 | 2.80 | 3.60  | 1.77E-06 |
| AFUA_3G06880 | Sorting nexin-3                                                                                                                                                  | 2.81 | 2.58 | 3.46  | 3.16E-04 |
| AFUA_2G00590 | Glutathione S-transferase, putative (EC 2.5.1.18)                                                                                                                | 2.81 | 1.86 | 2.26  | 1.59E-03 |
| AFUA_6G07720 | Phosphoenolpyruvate carboxykinase AcuF (EC 4.1.1.49)                                                                                                             | 2.81 | 2.33 | 2.72  | 2.44E-07 |
| AFUA_8G04090 | Choline oxidase (CodA), putative (EC 1.1.3.17)                                                                                                                   | 2.82 | 2.36 | 2.08  | 1.64E-08 |
| AFUA_3G11350 | ATPase get3 (EC 3.6.-.-) (Arsenical pump-driving ATPase) (Arsenite-stimulated ATPase) (Golgi to ER traffic protein 3) (Guided entry of tail-anchored proteins 3) | 2.82 | 1.72 | 3.08  | 7.97E-03 |
| AFUA_2G04590 | Alcohol dehydrogenase, putative (EC 1.1.1.-)                                                                                                                     | 2.84 | 1.45 | 1.67  | 1.37E-04 |
| AFUA_8G04080 | Betaine aldehyde dehydrogenase (BadH), putative (EC 1.2.1.8)                                                                                                     | 2.84 | 3.00 | 2.50  | 1.85E-06 |
| AFUA_5G09860 | S-formylglutathione hydrolase (EC 3.1.2.12)                                                                                                                      | 2.85 | 2.31 | 2.46  | 8.48E-06 |
| AFUA_3G11690 | Fructose-bisphosphate aldolase, class II (EC 4.1.2.13)                                                                                                           | 2.85 | 2.74 | 2.40  | 1.96E-10 |
| AFUA_5G02350 | Hydrolase, carbon-nitrogen family, putative                                                                                                                      | 2.87 | 1.32 | 2.15  | 1.12E-02 |
| AFUA_2G04320 | NADH-dependent flavin oxidoreductase, putative (EC 1.-.-)                                                                                                        | 2.88 | 3.06 | 3.15  | 6.48E-11 |
| AFUA_2G04490 | D-3-phosphoglycerate dehydrogenase (EC 1.1.1.95)                                                                                                                 | 2.90 | 0.19 | 0.56  | 5.40E-03 |
| AFUA_8G01670 | Catalase-peroxidase (CP) (EC 1.11.1.21) (Catalase-2) (Peroxidase/catalase)                                                                                       | 2.91 | 2.01 | 1.41  | 4.44E-09 |
| AFUA_5G10560 | Cytochrome c oxidase subunit V                                                                                                                                   | 2.91 | 1.58 | 2.70  | 1.01E-06 |
| AFUA_5G03860 | Alkaline phosphatase family protein (EC 3.1.-.-)                                                                                                                 | 2.91 | 1.43 | 2.99  | 2.46E-03 |
| AFUA_7G01000 | Aldehyde dehydrogenase, putative (EC 1.2.1.3)                                                                                                                    | 2.92 | 2.41 | 2.24  | 6.42E-09 |
| AFUA_4G10240 | Small nuclear ribonucleoprotein SmD3, putative                                                                                                                   | 2.93 | 0.33 | 1.86  | 1.92E-03 |
| AFUA_7G02280 | U5 snRNP complex subunit, putative                                                                                                                               | 2.93 | 2.45 | 2.59  | 8.28E-03 |
| AFUA_4G08760 | Phospho-2-dehydro-3-deoxyheptonate aldolase (EC 2.5.1.54)                                                                                                        | 2.94 | 2.29 | 3.14  | 1.80E-05 |
| AFUA_3G12950 | FAD binding domain protein (EC 1.5.3.-)                                                                                                                          | 2.95 | 3.08 | 1.33  | 2.34E-02 |
| AFUA_1G06240 | Riboflavin synthase, alpha subunit (EC 2.5.1.9)                                                                                                                  | 2.97 | 2.97 | 2.47  | 1.10E-04 |
| AFUA_6G12950 | Trehalose-6-phosphate synthase (EC 2.4.1.15) (UDP-glucose-glucosephosphate glucosyltransferase)                                                                  | 3.01 | 1.98 | 3.52  | 7.43E-05 |
| AFUA_3G08430 | Mitochondrial phosphate carrier protein, putative                                                                                                                | 3.04 | 1.57 | 2.38  | 5.50E-03 |
| AFUA_2G13630 | Aromatic aminotransferase Aro8, putative (EC 2.6.1.-)                                                                                                            | 3.08 | 1.96 | 1.61  | 7.87E-04 |
| AFUA_2G06040 | Actin cortical patch component, putative                                                                                                                         | 3.11 | 3.03 | 2.43  | 5.46E-09 |
| AFUA_1G07010 | Phosphatidate cytidyltransferase (EC 2.7.7.41)                                                                                                                   | 3.12 | 0.81 | 2.44  | 1.15E-02 |
| AFUA_3G07430 | Peptidyl-prolyl cis-trans isomerase (PPIase) (EC 5.2.1.8)                                                                                                        | 3.12 | 3.35 | 2.98  | 9.92E-09 |
| AFUA_2G13295 | Aminotransferase family protein (LolT), putative                                                                                                                 | 3.15 | 1.64 | 1.91  | 1.90E-03 |
| AFUA_5G08270 | HAD superfamily hydrolase, putative                                                                                                                              | 3.17 | 3.28 | 2.43  | 1.08E-07 |
| AFUA_4G07590 | CaaX prenyl protease Ste24 (EC 3.4.24.84)                                                                                                                        | 3.20 | 1.22 | 2.67  | 7.52E-04 |
| AFUA_7G05015 | Glyoxalase family protein                                                                                                                                        | 3.23 | 3.11 | 3.23  | 5.16E-06 |
| AFUA_5G04330 | Aminopeptidase (EC 3.4.11.-)                                                                                                                                     | 3.23 | 3.14 | 2.91  | 1.04E-09 |
| AFUA_6G02370 | Actin-related protein 2/3 complex subunit 4                                                                                                                      | 3.24 | 2.67 | 3.19  | 5.22E-06 |

|              |                                                                                                           |      |      |      |          |
|--------------|-----------------------------------------------------------------------------------------------------------|------|------|------|----------|
| AFUA_6G10260 | Aldehyde reductase (AKR1), putative (EC 1.1.1.2)                                                          | 3.26 | 3.25 | 2.95 | 3.81E-11 |
| AFUA_1G15610 | Oxidoreductase, zinc-binding dehydrogenase family, putative (EC 1.3.1.-)                                  | 3.27 | 3.06 | 3.36 | 9.47E-09 |
| AFUA_5G03330 | HypA-like protein, putative                                                                               | 3.28 | 2.78 | 3.08 | 2.01E-05 |
| AFUA_3G12510 | Vesicular fusion ATPase, putative                                                                         | 3.29 | 1.34 | 1.38 | 5.57E-05 |
| AFUA_2G17070 | Defective in cullin neddylation protein                                                                   | 3.34 | 2.92 | 2.04 | 2.08E-03 |
| AFUA_1G02570 | Aspartyl-tRNA synthetase, cytoplasmic (EC 6.1.1.12)                                                       | 3.37 | 1.41 | 2.82 | 2.34E-05 |
| AFUA_4G05870 | Oxidoreductase, short-chain dehydrogenase/reductase family                                                | 3.37 | 3.29 | 2.83 | 6.10E-06 |
| AFUA_5G13510 | Cell cycle control protein (Cwf8), putative                                                               | 3.40 | 2.49 | 2.22 | 1.58E-06 |
| AFUA_3G00680 | Amine oxidase (EC 1.4.3.-)                                                                                | 3.44 | 1.35 | 1.88 | 1.22E-03 |
| AFUA_1G09660 | Mitochondrial 2-oxodicarboxylate carrier protein, putative                                                | 3.45 | 1.64 | 2.72 | 2.28E-05 |
| AFUA_4G07150 | Cytochrome c subunit, putative                                                                            | 3.45 | 2.41 | 2.78 | 1.10E-06 |
| AFUA_2G14850 | Enoyl-CoA hydratase/isomerase family protein (EC 4.2.-.-)                                                 | 3.46 | 2.02 | 2.40 | 1.40E-04 |
| AFUA_7G04180 | Amine oxidase (EC 1.4.3.-)                                                                                | 3.46 | 2.15 | 1.42 | 5.87E-08 |
| AFUA_6G14100 | Mitochondrial carnitine:acyl carnitine carrier, putative                                                  | 3.46 | 2.04 | 2.78 | 2.40E-04 |
| AFUA_1G04720 | C-8 sterol isomerase (Erg-1), putative                                                                    | 3.48 | 1.57 | 1.64 | 3.80E-04 |
| AFUA_6G13440 | Choline sulfatase, putative (EC 3.1.6.6)                                                                  | 3.50 | 1.09 | 2.07 | 9.70E-04 |
| AFUA_2G09790 | Glucose-6-phosphate isomerase (EC 5.3.1.9)                                                                | 3.53 | 3.67 | 3.45 | 1.95E-08 |
| AFUA_8G00620 | Dimethylallyl tryptophan synthase, putative (EC 2.5.1. )                                                  | 3.57 | 0.95 | 0.59 | 4.77E-03 |
| AFUA_6G00770 | Probable arabinan endo-1,5-alpha-L-arabinosidase C (EC 3.2.1.99) (Endo-1,5-alpha-L-arabinanase C) (ABN C) | 3.60 | 3.10 | 2.44 | 3.91E-04 |
| AFUA_1G06700 | Metacaspase-1A (EC 3.4.22.-)                                                                              | 3.64 | 2.10 | 2.07 | 1.94E-03 |
| AFUA_1G10150 | Uncharacterized protein                                                                                   | 3.69 | 2.92 | 3.83 | 2.18E-05 |
| AFUA_3G14690 | Aminotransferase, putative (EC 2.-.-.)                                                                    | 3.71 | 1.68 | 2.25 | 1.24E-02 |
| AFUA_4G10920 | Uncharacterized protein                                                                                   | 3.76 | 2.69 | 2.97 | 4.54E-05 |
| AFUA_1G12250 | Mitochondrial hypoxia responsive domain protein                                                           | 3.82 | 1.09 | 1.94 | 2.25E-02 |
| AFUA_3G14270 | Aldo-keto reductase (AKR), putative (EC 1.1.1.-)                                                          | 3.85 | 3.37 | 3.39 | 1.19E-04 |
| AFUA_5G09680 | Succinate dehydrogenase cytochrome b560 subunit (EC 1.3.5.1)                                              | 4.04 | 2.82 | 3.57 | 1.28E-05 |
| AFUA_4G13750 | Neutral protease 2 homolog AFUA_4G13750 (EC 3.4.24.39) (Deuterolysin AFUA_4G13750)                        | 4.36 | 2.08 | 0.81 | 5.27E-05 |
| AFUA_6G02450 | 40S ribosomal protein S30                                                                                 | 4.38 | 2.31 | 6.33 | 5.94E-10 |
| AFUA_8G00430 | Uncharacterized protein                                                                                   | 4.49 | 2.93 | 1.05 | 9.95E-07 |
| AFUA_5G02640 | O-methyltransferase, putative (EC 2.1.1.-)                                                                | 4.70 | 1.45 | 0.38 | 1.42E-07 |
| AFUA_6G12870 | Iron-sulfur clusters transporter atm1, mitochondrial                                                      | 4.78 | 2.84 | 4.54 | 4.29E-04 |

Differentially expressed proteins in IF1SW-F4

| Gene         | Protein names                                                                            | Relative protein abundance* |           |          | P-value  |
|--------------|------------------------------------------------------------------------------------------|-----------------------------|-----------|----------|----------|
|              |                                                                                          | CEA10                       | ISSFT-021 | IF1SW-F4 |          |
| AFUA_2G14330 | Uncharacterized protein                                                                  | -3.51                       | -5.48     | -6.27    | 2.39E-06 |
| AFUA_4G09600 | GPI anchored protein, putative                                                           | -3.43                       | -6.26     | -5.82    | 1.33E-07 |
| AFUA_7G01340 | RPEL repeat protein                                                                      | -3.36                       | -5.15     | -5.55    | 4.07E-10 |
| AFUA_7G04930 | Alkaline serine protease (PR1)/allergen F18-like (EC 3.4.21.-)                           | -3.63                       | -5.32     | -5.53    | 1.14E-06 |
| AFUA_4G08960 | GPI anchored cell wall protein, putative                                                 | -3.69                       | -5.18     | -5.37    | 8.40E-05 |
| AFUA_1G13550 | Uncharacterized protein                                                                  | -3.59                       | -6.12     | -5.23    | 5.82E-03 |
| AFUA_2G15810 | Uncharacterized protein                                                                  | -2.96                       | -5.32     | -5.18    | 3.13E-03 |
| AFUA_5G13100 | Uncharacterized protein                                                                  | -3.50                       | -5.95     | -5.15    | 9.50E-09 |
| AFUA_6G12450 | Chaperone/heat shock protein Hsp12, putative                                             | -4.05                       | -5.81     | -5.12    | 5.46E-05 |
| AFUA_3G13850 | LRP16 family protein                                                                     | -2.27                       | -4.37     | -4.88    | 1.16E-03 |
| AFUA_7G04520 | Uncharacterized protein                                                                  | -3.31                       | -5.06     | -4.87    | 1.19E-05 |
| AFUA_3G05570 | Spindle poison sensitivity protein Sep3, putative                                        | -2.94                       | -5.28     | -4.83    | 4.20E-04 |
| AFUA_5G14210 | Glucose repressible protein Grg1, putative                                               | -3.21                       | -7.14     | -4.80    | 1.87E-07 |
| AFUA_1G12070 | Glycine cleavage system H protein                                                        | -3.95                       | -4.38     | -4.79    | 8.05E-05 |
| AFUA_4G00860 | Cell surface protein, putative                                                           | -3.54                       | -5.64     | -4.62    | 1.37E-07 |
| AFUA_6G09740 | Thioredoxin reductase gliT (EC 1.8.1.-) (Gliotoxin biosynthesis protein T)               | -3.30                       | -3.75     | -4.59    | 9.90E-08 |
| AFUA_4G14205 | Uncharacterized protein                                                                  | -3.49                       | -6.22     | -4.43    | 9.36E-06 |
| AFUA_1G17370 | Heat shock protein Awh11, putative                                                       | -2.95                       | -5.23     | -4.26    | 4.25E-07 |
| AFUA_6G04390 | E3 ubiquitin-protein ligase bre1 (EC 2.3.2.27) (RING-type E3 ubiquitin transferase bre1) | -3.76                       | -4.23     | -4.24    | 8.60E-05 |
| AFUA_3G14540 | Heat shock protein Hsp30/Hsp42, putative                                                 | -3.73                       | -4.52     | -4.20    | 3.63E-08 |
| AFUA_3G05430 | ATP-dependent RNA helicase dhh1 (EC 3.6.4.13)                                            | -2.86                       | -5.81     | -4.16    | 7.98E-04 |
| AFUA_2G05635 | Uncharacterized protein                                                                  | -2.73                       | -4.18     | -4.06    | 4.08E-03 |
| AFUA_3G10410 | Conserved serine-rich protein                                                            | -2.82                       | -4.81     | -3.94    | 3.68E-05 |
| AFUA_1G03580 | Uncharacterized protein                                                                  | -2.87                       | -3.41     | -3.86    | 1.07E-03 |
| AFUA_2G10020 | Uncharacterized protein                                                                  | -3.67                       | -5.69     | -3.86    | 3.03E-07 |
| AFUA_6G03210 | Conidiation-specific protein (Con-10), putative                                          | -2.13                       | -4.73     | -3.82    | 3.46E-04 |
| AFUA_3G12790 | Conserved glutamic acid-rich protein                                                     | -3.32                       | -3.53     | -3.82    | 1.63E-04 |
| AFUA_2G03390 | Histone deacetylase (EC 3.5.1.98)                                                        | -4.27                       | -5.76     | -3.78    | 1.15E-03 |
| AFUA_6G13500 | Uncharacterized protein                                                                  | -3.21                       | -5.61     | -3.77    | 7.19E-07 |
| AFUA_1G13560 | Uncharacterized protein                                                                  | -3.23                       | -5.10     | -3.77    | 1.79E-06 |
| AFUA_4G12490 | Guanine nucleotide exchange factor Vps9, putative                                        | -2.86                       | -4.52     | -3.77    | 1.66E-04 |
| AFUA_5G12590 | Solid-state culture expressed protein (Aos23), putative                                  | -3.38                       | -2.76     | -3.75    | 2.32E-03 |
| AFUA_1G03710 | C2H2 finger domain protein, putative                                                     | -4.02                       | -4.17     | -3.69    | 7.80E-03 |
| AFUA_2G05540 | Pre-mRNA-splicing factor cef1                                                            | -2.16                       | -3.57     | -3.66    | 5.22E-03 |
| AFUA_8G05650 | Uncharacterized protein                                                                  | -2.35                       | -3.36     | -3.61    | 2.53E-03 |
| AFUA_4G06820 | Protein ecm33                                                                            | -3.26                       | -4.32     | -3.59    | 5.49E-10 |
| AFUA_6G10700 | Chaperonin, putative                                                                     | -3.60                       | -4.94     | -3.42    | 8.19E-05 |
| AFUA_3G14260 | Mismatched base pair and cruciform DNA recognition protein, putative                     | -3.27                       | -5.16     | -3.37    | 2.05E-06 |
| AFUA_1G10550 | CBF/NF-Y family transcription factor, putative                                           | -4.29                       | -5.75     | -3.37    | 3.43E-06 |
| AFUA_4G10150 | Alpha-glucosidase AgdA, putative (EC 3.2.1.20)                                           | -2.96                       | -3.13     | -3.34    | 5.33E-05 |
| AFUA_2G14490 | Endoglucanase, putative (EC 3.2.1.-)                                                     | -2.17                       | -3.83     | -3.33    | 1.17E-04 |
| AFUA_4G09750 | 50S ribosomal protein L12                                                                | -3.36                       | -4.10     | -3.30    | 9.15E-05 |
| AFUA_3G09030 | Regulatory protein SUAPRGA1                                                              | -2.83                       | -3.80     | -3.30    | 3.56E-03 |
| AFUA_3G10610 | Uncharacterized protein                                                                  | -3.33                       | -3.48     | -3.28    | 7.75E-04 |
| AFUA_1G01950 | Uncharacterized protein                                                                  | -3.62                       | -4.06     | -3.24    | 4.23E-04 |
| AFUA_3G07870 | Extracellular serine-rich protein, putative                                              | -1.73                       | -2.89     | -3.23    | 1.27E-06 |
| AFUA_6G12000 | Uncharacterized protein                                                                  | -3.87                       | -5.08     | -3.22    | 6.46E-06 |
| AFUA_7G04920 | Uncharacterized protein                                                                  | -2.28                       | -3.48     | -3.20    | 3.66E-02 |
| AFUA_1G15010 | AMP binding domain protein, putative                                                     | -4.47                       | -3.65     | -3.15    | 2.42E-03 |
| AFUA_2G03010 | Cytochrome c subunit Vb, putative                                                        | -2.09                       | -3.83     | -3.13    | 8.44E-07 |
| AFUA_3G13430 | Uncharacterized protein                                                                  | -2.63                       | -2.56     | -3.12    | 2.45E-02 |
| AFUA_2G15070 | 26S proteasome regulatory subunit S5A                                                    | -2.59                       | -4.07     | -3.12    | 8.53E-06 |
| AFUA_1G11640 | Cytosolic Cu/Zn superoxide dismutase, putative                                           | -3.95                       | -2.30     | -3.07    | 3.00E-06 |
| AFUA_3G10190 | Peroxisomal membrane anchor protein (Pex14), putative                                    | -2.34                       | -2.48     | -3.06    | 2.78E-03 |
| AFUA_8G01980 | Uncharacterized protein                                                                  | -3.27                       | -4.01     | -3.02    | 3.84E-06 |

|              |                                                                        |       |       |       |          |
|--------------|------------------------------------------------------------------------|-------|-------|-------|----------|
| AFUA_5G12180 | Ran-specific GTPase-activating protein 1, putative                     | -3.75 | -3.12 | -3.01 | 9.69E-08 |
| AFUA_2G13040 | GrpE protein homolog                                                   | -3.48 | -4.15 | -3.01 | 2.23E-08 |
| AFUA_6G09120 | Uncharacterized protein                                                | -3.52 | -4.91 | -2.97 | 1.10E-05 |
| AFUA_4G11390 | Ubiquinol-cytochrome c reductase complex 17 kd protein                 | -1.72 | -2.64 | -2.94 | 3.97E-08 |
| AFUA_6G08660 | M protein repeat protein                                               | -3.12 | -3.33 | -2.87 | 4.62E-05 |
| AFUA_8G04310 | Uncharacterized protein                                                | -2.55 | -3.87 | -2.86 | 2.62E-03 |
| AFUA_4G04318 | Copper resistance protein Crd2, putative                               | -1.49 | -2.35 | -2.86 | 1.30E-07 |
| AFUA_2G03790 | Oxysterol binding protein (Osh7), putative                             | -3.18 | -4.47 | -2.85 | 8.13E-03 |
| AFUA_1G13670 | Uncharacterized protein                                                | -3.36 | -3.10 | -2.85 | 4.02E-08 |
| AFUA_3G09990 | Uncharacterized protein                                                | -2.59 | -3.39 | -2.84 | 4.40E-04 |
| AFUA_2G13380 | GATA transcription factor (AreB), putative                             | -2.97 | -2.48 | -2.78 | 4.61E-03 |
| AFUA_1G13530 | Uncharacterized protein                                                | -4.30 | -3.82 | -2.75 | 3.15E-04 |
| AFUA_6G12290 | PH domain protein                                                      | -2.32 | -2.92 | -2.73 | 1.83E-04 |
| AFUA_2G01540 | Uncharacterized protein                                                | -3.19 | -3.99 | -2.73 | 1.21E-05 |
| AFUA_3G13240 | Aldose 1-epimerase, putative (EC 5.1.3.3)                              | -1.59 | -1.36 | -2.73 | 2.77E-06 |
| AFUA_2G07600 | SRP receptor beta subunit (Srp102), putative                           | -2.01 | -4.19 | -2.72 | 3.98E-03 |
| AFUA_7G02020 | Uncharacterized protein                                                | -2.67 | -3.38 | -2.69 | 3.83E-05 |
| AFUA_5G09380 | Uncharacterized protein                                                | -2.31 | -3.71 | -2.68 | 1.67E-03 |
| AFUA_6G06670 | Uncharacterized protein                                                | -2.65 | -2.85 | -2.68 | 5.35E-05 |
| AFUA_4G09580 | Major allergen Asp f 2 (Allergen Asp f II) (allergen Asp f 2)          | -2.12 | -2.88 | -2.68 | 1.20E-03 |
| AFUA_4G03780 | Probable rhamnogalacturonate lyase A (EC 4.2.2.23)                     | -1.78 | -2.88 | -2.67 | 2.33E-02 |
| AFUA_3G13750 | Uncharacterized protein                                                | -1.21 | -0.92 | -2.66 | 1.02E-03 |
| AFUA_7G01200 | Aspergillopepsin, putative (EC 3.4.23.-)                               | -3.45 | -4.45 | -2.66 | 8.43E-07 |
| AFUA_4G10280 | Phosphotransmitter protein Ypd1, putative                              | -3.40 | -3.09 | -2.65 | 1.54E-06 |
| AFUA_6G13670 | Reticulon-like protein                                                 | -3.69 | -5.29 | -2.62 | 3.96E-08 |
| AFUA_7G05270 | COMPASS complex subunit Sdc1, putative                                 | -3.87 | -3.18 | -2.60 | 3.89E-03 |
| AFUA_2G10810 | Nuclear protein export protein Yrb2, putative                          | -3.67 | -3.85 | -2.59 | 3.31E-02 |
| AFUA_8G04270 | AAA family ATPase, putative                                            | -2.48 | -3.22 | -2.58 | 4.41E-04 |
| AFUA_6G04690 | Uncharacterized protein                                                | -2.96 | -2.89 | -2.57 | 8.64E-03 |
| AFUA_8G04920 | LEA domain protein                                                     | -2.00 | -2.70 | -2.54 | 4.55E-04 |
| AFUA_7G04030 | Uncharacterized protein                                                | -3.36 | -4.62 | -2.54 | 1.06E-04 |
| AFUA_4G03322 | WW domain protein                                                      | -0.34 | -2.27 | -2.52 | 5.11E-03 |
| AFUA_3G11550 | LEA domain protein                                                     | -3.34 | -2.74 | -2.50 | 2.51E-06 |
| AFUA_4G09740 | T-complex protein 1, theta subunit, putative                           | -2.71 | -4.22 | -2.49 | 2.19E-07 |
| AFUA_7G00580 | Uncharacterized protein                                                | -2.04 | -1.96 | -2.49 | 3.96E-07 |
| AFUA_5G07240 | SAP domain protein                                                     | -1.84 | -2.11 | -2.42 | 1.82E-03 |
| AFUA_1G09250 | CUE domain protein, putative                                           | -2.03 | -3.06 | -2.38 | 4.12E-02 |
| AFUA_3G09870 | Uncharacterized protein                                                | -1.85 | -2.52 | -2.36 | 9.93E-03 |
| AFUA_2G11740 | Lon protease homolog, mitochondrial (EC 3.4.21.53)                     | -2.25 | -3.40 | -2.33 | 9.12E-05 |
| AFUA_4G10020 | Clathrin light chain                                                   | -3.70 | -3.30 | -2.33 | 1.95E-06 |
| AFUA_7G02340 | L-PSP endoribonuclease family protein (Hmf1), putative                 | -3.47 | -2.50 | -2.31 | 2.66E-06 |
| AFUA_7G05470 | Electron transfer flavoprotein alpha subunit, putative                 | -2.00 | -1.96 | -2.30 | 2.77E-03 |
| AFUA_4G01030 | Uncharacterized protein                                                | -2.57 | -1.27 | -2.29 | 2.17E-05 |
| AFUA_3G02340 | CBF/NF-Y family transcription factor, putative                         | -2.41 | -3.75 | -2.28 | 4.63E-04 |
| AFUA_5G02420 | Splicing factor 3a subunit 3, putative                                 | -2.70 | -4.03 | -2.28 | 1.60E-02 |
| AFUA_7G05610 | Glucanase, putative (EC 3.2.1.-)                                       | -1.47 | -2.53 | -2.26 | 1.18E-04 |
| AFUA_1G04470 | Mitochondrial import inner membrane translocase subunit tim10          | -1.92 | -3.78 | -2.26 | 1.15E-03 |
| AFUA_5G02750 | Cytochrome c oxidase subunit Va, putative                              | -1.79 | -3.20 | -2.26 | 3.37E-07 |
| AFUA_1G15780 | 3-isopropylmalate dehydrogenase (EC 1.1.1.85)                          | -1.67 | -2.72 | -2.26 | 5.25E-09 |
| AFUA_1G14280 | C6 finger domain protein, putative                                     | -1.03 | -0.91 | -2.25 | 6.39E-03 |
| AFUA_8G07060 | Hydrophobin, putative                                                  | -2.23 | -1.93 | -2.21 | 1.08E-07 |
| AFUA_6G02260 | Uncharacterized protein                                                | -3.21 | -3.41 | -2.20 | 1.03E-05 |
| AFUA_2G13590 | Uncharacterized protein                                                | -1.88 | -1.80 | -2.20 | 1.78E-07 |
| AFUA_1G01812 | MFS transporter, putative                                              | -4.17 | -2.93 | -2.20 | 4.25E-03 |
| AFUA_8G00550 | Methyltransferase psoC (EC 2.1.1.-) (Pseurotin biosynthesis protein C) | -2.78 | -2.15 | -2.19 | 2.53E-08 |
| AFUA_2G17620 | Cellobiose dehydrogenase                                               | -1.08 | -1.36 | -2.19 | 1.66E-03 |
| AFUA_2G08640 | Uncharacterized protein                                                | -3.54 | -3.32 | -2.18 | 4.06E-04 |
| AFUA_5G03780 | L-PSP endoribonuclease family protein Brt1, putative                   | -0.80 | -0.81 | -2.17 | 1.59E-02 |
| AFUA_7G04210 | Tropomyosin, putative                                                  | -2.91 | -3.60 | -2.17 | 6.38E-06 |

|              |                                                                                                                                   |       |       |       |          |
|--------------|-----------------------------------------------------------------------------------------------------------------------------------|-------|-------|-------|----------|
| AFUA_2G02320 | Hsp70 chaperone (BiP), putative                                                                                                   | -2.06 | -3.07 | -2.16 | 3.26E-05 |
| AFUA_7G05450 | Secreted beta-glucosidase sun1 (EC 3.2.1.-)                                                                                       | -0.61 | -1.87 | -2.15 | 4.13E-02 |
| AFUA_3G10340 | Rho GTPase Rho 2, putative                                                                                                        | -0.96 | -2.51 | -2.14 | 2.12E-03 |
| AFUA_2G11840 | Transcriptional corepressor Cyc8, putative                                                                                        | -3.28 | -3.54 | -2.12 | 4.54E-06 |
| AFUA_6G08320 | Uncharacterized protein                                                                                                           | -2.49 | -3.08 | -2.11 | 1.21E-07 |
| AFUA_6G08360 | Thiamine thiazole synthase (Thiazole biosynthetic enzyme)                                                                         | -1.59 | -0.65 | -2.09 | 9.43E-06 |
| AFUA_2G10320 | SH3 domain protein                                                                                                                | -2.98 | -2.27 | -2.08 | 2.01E-03 |
| AFUA_1G08880 | Iron/copper transporter Atx1, putative                                                                                            | -3.41 | -3.69 | -2.06 | 9.37E-11 |
| AFUA_2G07950 | ATP dependent RNA helicase, putative                                                                                              | -2.84 | -2.54 | -2.06 | 4.88E-04 |
| AFUA_2G11860 | Uncharacterized protein                                                                                                           | -2.13 | -2.64 | -2.05 | 1.13E-06 |
| AFUA_1G06910 | Probable arabinogalactan endo-beta-1,4-galactanase A (EC 3.2.1.89) (Endo-1,4-beta-galactanase A) (Galactanase A)                  | -0.43 | -1.53 | -2.04 | 9.05E-06 |
| AFUA_2G10100 | 60S acidic ribosomal protein P2 (AfP2) (allergen Asp f 8)                                                                         | -3.24 | -2.65 | -2.04 | 1.16E-06 |
| AFUA_1G12590 | RNA-binding La domain protein                                                                                                     | -2.34 | -2.41 | -2.04 | 2.24E-03 |
| AFUA_4G06960 | UBX domain protein, putative                                                                                                      | 0.16  | -0.99 | -2.03 | 8.96E-03 |
| AFUA_2G17470 | L-PSP endoribonuclease family protein, putative                                                                                   | 0.01  | -2.24 | -2.03 | 2.01E-03 |
| AFUA_3G10920 | Telomere and ribosome associated protein Stm1, putative                                                                           | -3.30 | -4.13 | -2.02 | 1.67E-07 |
| AFUA_4G02805 | Asp hemolysin-like protein                                                                                                        | -3.31 | -4.42 | -2.02 | 7.88E-05 |
| AFUA_6G14470 | Uncharacterized protein                                                                                                           | -0.31 | -1.05 | -1.98 | 2.67E-06 |
| AFUA_5G10240 | Uncharacterized protein                                                                                                           | -2.14 | -2.48 | -1.96 | 4.17E-04 |
| AFUA_3G00840 | FAD-dependent oxygenase, putative                                                                                                 | -1.72 | -1.31 | -1.95 | 3.99E-09 |
| AFUA_1G06830 | 60S acidic ribosomal protein P1 (AfP1)                                                                                            | -3.67 | -3.62 | -1.95 | 2.73E-05 |
| AFUA_4G06670 | Allergen Asp f 7 (allergen Asp f 7)                                                                                               | -3.09 | -1.97 | -1.95 | 2.08E-03 |
| AFUA_1G16840 | Translationally-controlled tumor protein homolog (TCTP)                                                                           | -3.18 | -2.43 | -1.94 | 1.32E-06 |
| AFUA_4G03420 | L-PSP endoribonuclease family protein, putative                                                                                   | -2.35 | -2.93 | -1.93 | 1.30E-03 |
| AFUA_6G04610 | DNA-directed RNA polymerase I and III 14 kDa polypeptide                                                                          | -2.32 | -2.56 | -1.91 | 1.48E-02 |
| AFUA_5G07890 | SsDNA binding protein, putative                                                                                                   | -1.01 | -1.33 | -1.91 | 1.19E-06 |
| AFUA_3G00880 | UPF0619 GPI-anchored membrane protein AFUA_3G00880                                                                                | -1.02 | -1.53 | -1.89 | 6.79E-04 |
| AFUA_8G04570 | PWWP domain protein                                                                                                               | -2.20 | -2.26 | -1.89 | 4.06E-07 |
| AFUA_6G05350 | Probable aspartic-type endopeptidase opsB (EC 3.4.23.-)                                                                           | -3.15 | -3.64 | -1.88 | 7.65E-06 |
| AFUA_1G11870 | Mitochondrial processing peptidase alpha subunit, putative (EC 3.4.24.64)                                                         | -1.96 | -2.37 | -1.88 | 1.36E-02 |
| AFUA_6G02830 | Uncharacterized protein                                                                                                           | -4.08 | -2.59 | -1.87 | 6.97E-04 |
| AFUA_1G09030 | Uncharacterized protein                                                                                                           | -2.72 | -3.81 | -1.86 | 4.70E-07 |
| AFUA_7G02570 | NIMA-interacting protein TinC                                                                                                     | -2.34 | -2.21 | -1.85 | 1.13E-03 |
| AFUA_4G03240 | Cell wall serine-threonine-rich galactomannoprotein Mpl                                                                           | -1.32 | -1.48 | -1.83 | 8.46E-08 |
| AFUA_2G15840 | HET-C domain protein HetC                                                                                                         | -2.38 | -1.65 | -1.82 | 8.39E-03 |
| AFUA_2G02020 | Formamidase FmdS (EC 3.5.1.49)                                                                                                    | -0.41 | -1.24 | -1.81 | 1.36E-07 |
| AFUA_2G08540 | DNA-directed RNA polymerase subunit                                                                                               | -2.19 | -2.84 | -1.80 | 1.46E-05 |
| AFUA_5G10990 | Uncharacterized protein                                                                                                           | -1.13 | -0.61 | -1.79 | 7.89E-06 |
| AFUA_2G16020 | T-complex protein 1, alpha subunit, putative                                                                                      | -1.91 | -3.60 | -1.79 | 1.56E-02 |
| AFUA_4G08030 | MICOS complex subunit mic60 (Mitofilin)                                                                                           | -1.95 | -2.68 | -1.76 | 2.21E-02 |
| AFUA_1G12390 | G2/M phase checkpoint control protein Sum2, putative                                                                              | -2.58 | -3.14 | -1.76 | 3.72E-05 |
| AFUA_5G00870 | Uncharacterized protein                                                                                                           | -0.50 | -0.63 | -1.75 | 4.24E-03 |
| AFUA_1G11530 | 2,4-dihydroxyhept-2-ene-1,7-dioic acid aldolase (EC 4.1.2.20)                                                                     | -0.99 | -1.54 | -1.75 | 2.49E-05 |
| AFUA_2G08670 | Acetyl-CoA carboxylase                                                                                                            | -2.01 | -2.80 | -1.74 | 3.47E-02 |
| AFUA_7G01010 | Alcohol dehydrogenase, putative (EC 1.1.1.1)                                                                                      | -2.36 | -1.74 | -1.73 | 3.63E-08 |
| AFUA_6G13120 | Filament-forming protein (Tpr/p270), putative                                                                                     | -2.42 | -2.55 | -1.72 | 5.43E-07 |
| AFUA_3G02200 | Uncharacterized protein                                                                                                           | -1.15 | -0.68 | -1.72 | 2.08E-02 |
| AFUA_6G08720 | S-methyl-5'-thioadenosine phosphorylase (EC 2.4.2.28) (5'-methylthioadenosine phosphorylase) (MTA phosphorylase) (MTAP) (MTAPase) | -0.64 | -1.09 | -1.72 | 7.37E-06 |
| AFUA_2G10030 | Actin cytoskeleton protein (VIP1), putative                                                                                       | -2.32 | -2.87 | -1.72 | 1.19E-09 |
| AFUA_7G03970 | Uncharacterized protein                                                                                                           | -0.01 | -0.79 | -1.72 | 9.41E-06 |
| AFUA_6G10930 | Extracellular protein, putative (EC 2.7.7.6)                                                                                      | -2.39 | -0.17 | -1.71 | 1.38E-07 |

|              |                                                                                                                 |       |       |       |          |
|--------------|-----------------------------------------------------------------------------------------------------------------|-------|-------|-------|----------|
| AFUA_5G06240 | Alcohol dehydrogenase, putative (EC 1.1.1.1)                                                                    | -1.44 | -1.06 | -1.71 | 1.25E-08 |
| AFUA_2G17540 | Multicopper oxidase abr1 (EC 1.-.-.) (Conidial pigment biosynthesis oxidase abr1)                               | -1.23 | -2.30 | -1.71 | 2.97E-04 |
| AFUA_2G13820 | SAP domain protein, putative                                                                                    | -2.28 | -1.54 | -1.70 | 9.89E-07 |
| AFUA_2G11060 | Acyl CoA binding protein family                                                                                 | -1.87 | -1.01 | -1.69 | 2.34E-07 |
| AFUA_5G07080 | Beta-glucosidase, putative (EC 3.2.1.21)                                                                        | -1.76 | -1.77 | -1.67 | 3.56E-05 |
| AFUA_2G05340 | 1,3-beta-glucanosyltransferase gel4 (EC 2.4.1.-) (Glucan elongating glucanosyltransferase 4)                    | -0.60 | -0.83 | -1.66 | 2.02E-04 |
| AFUA_1G15960 | Glutathione oxidoreductase Glr1, putative (EC 1.8.1.7)                                                          | -0.75 | -1.13 | -1.66 | 6.15E-07 |
| AFUA_5G09600 | 2-nitropropane dioxygenase family oxidoreductase, putative (EC 1.3.1.9)                                         | 0.41  | -1.54 | -1.66 | 1.28E-03 |
| AFUA_4G09280 | Uncharacterized protein                                                                                         | -2.55 | -2.57 | -1.65 | 1.51E-06 |
| AFUA_5G14740 | Fucose-specific lectin FleA                                                                                     | -2.31 | -0.76 | -1.64 | 2.23E-06 |
| AFUA_4G03595 | Uncharacterized protein                                                                                         | -0.08 | -0.25 | -1.63 | 4.12E-03 |
| AFUA_3G08230 | MRS7 family protein                                                                                             | -2.97 | -3.12 | -1.63 | 4.35E-04 |
| AFUA_5G10550 | ATP synthase subunit beta (EC 3.6.3.14)                                                                         | -2.85 | -3.44 | -1.63 | 9.29E-07 |
| AFUA_2G09650 | Aspartate transaminase, putative (EC 2.6.1.1)                                                                   | -0.71 | -0.75 | -1.63 | 5.97E-05 |
| AFUA_5G11390 | APSES transcription factor, putative                                                                            | -3.22 | -3.30 | -1.63 | 3.38E-04 |
| AFUA_3G14170 | MFS glucose transporter, putative                                                                               | -0.94 | -0.68 | -1.63 | 1.90E-02 |
| AFUA_3G11740 | RNAPII degradation factor Def1, putative                                                                        | -1.40 | -2.40 | -1.63 | 1.23E-02 |
| AFUA_3G01130 | Cell wall protein, putative                                                                                     | 0.30  | -0.77 | -1.62 | 6.00E-06 |
| AFUA_2G14670 | Eukaryotic translation initiation factor 3 subunit D (eIF3d)                                                    | -1.59 | -2.17 | -1.62 | 2.36E-02 |
| AFUA_2G16830 | Endonuclease/exonuclease/phosphatase family protein                                                             | -0.58 | -1.01 | -1.62 | 2.19E-06 |
| AFUA_2G13310 | RING finger domain protein, putative                                                                            | 0.82  | -2.49 | -1.61 | 4.25E-03 |
| AFUA_3G00270 | Probable glucan endo-1,3-beta-glucosidase eglC (EC 3.2.1.39) (Endo-1,3-beta-glucanase eglC) (Laminarinase eglC) | -1.39 | 0.35  | -1.60 | 2.49E-06 |
| AFUA_6G06345 | 6,7-dimethyl-8-ribityllumazine synthase (DMRL synthase) (EC 2.5.1.78)                                           | -0.63 | -1.37 | -1.59 | 2.54E-04 |
| AFUA_2G05400 | Sugar hydrolase, putative                                                                                       | -1.59 | -1.70 | -1.59 | 7.69E-05 |
| AFUA_7G06010 | Uncharacterized protein                                                                                         | -2.81 | -1.84 | -1.57 | 3.36E-04 |
| AFUA_1G05770 | Probable beta-glucosidase A (EC 3.2.1.21) (Beta-D-glucoside glucohydrolase A) (Cellobiase A) (Gentiobiase A)    | 0.01  | -0.87 | -1.57 | 1.29E-06 |
| AFUA_6G08990 | Uncharacterized protein                                                                                         | -3.86 | -1.45 | -1.56 | 3.84E-04 |
| AFUA_5G02090 | UPF0047 domain protein                                                                                          | -0.84 | -1.02 | -1.54 | 3.49E-04 |
| AFUA_4G11110 | C2 domain protein                                                                                               | -2.90 | -2.46 | -1.53 | 7.18E-05 |
| AFUA_1G09890 | Uncharacterized protein                                                                                         | -1.49 | -1.80 | -1.53 | 3.17E-03 |
| AFUA_5G12940 | Arylsulfatase, putative (EC 3.1.6.1)                                                                            | -1.29 | -0.57 | -1.52 | 5.40E-04 |
| AFUA_2G15510 | DUF866 domain protein                                                                                           | 0.98  | -1.44 | -1.51 | 7.12E-07 |
| AFUA_1G09280 | Protein phosphatase 2C, putative (EC 3.1.3.16)                                                                  | -2.66 | -2.78 | -1.51 | 2.23E-03 |
| AFUA_2G01250 | Serine peptidase, putative (EC 3.4.-.)                                                                          | -1.91 | -1.15 | -1.51 | 1.13E-04 |
| AFUA_1G12190 | Uncharacterized protein                                                                                         | -3.06 | -1.41 | -1.50 | 1.89E-05 |
| AFUA_2G15710 | Uncharacterized protein                                                                                         | -0.59 | -0.78 | -1.50 | 5.38E-06 |
| AFUA_1G05520 | Mandelate racemase/muconate lactonizing enzyme family protein (EC 4.2.1.6)                                      | -0.94 | -1.21 | -1.50 | 1.37E-02 |
| AFUA_1G16250 | Probable alpha/beta-glucosidase agdC (EC 3.2.1.20) (EC 3.2.1.21)                                                | -0.82 | -0.89 | -1.50 | 4.86E-05 |
| AFUA_2G12190 | Mitochondrial import inner membrane translocase subunit tim13                                                   | -2.36 | -2.32 | -1.49 | 2.80E-03 |
| AFUA_4G08720 | Lysophospholipase 1 (EC 3.1.1.5) (Phospholipase B 1)                                                            | -0.56 | -1.13 | -1.47 | 7.68E-06 |
| AFUA_2G11340 | Phosphatidylglycerol/phosphatidylinositol transfer protein (PG/PI-TP)                                           | -0.10 | -0.64 | -1.47 | 1.83E-05 |
| AFUA_2G04280 | Asparaginase, putative (EC 3.5.1.1)                                                                             | -0.97 | -0.60 | -1.46 | 4.14E-03 |
| AFUA_8G06970 | Beta-glucosidase (EC 3.2.1.21)                                                                                  | -2.14 | -2.14 | -1.45 | 1.78E-02 |
| AFUA_1G03140 | Glycosyl hydrolase, putative (EC 3.2.1.-)                                                                       | -0.31 | -1.31 | -1.44 | 1.39E-06 |
| AFUA_2G09490 | Eukaryotic translation initiation factor subunit eIF-4F, putative                                               | -2.07 | -1.60 | -1.44 | 4.05E-05 |
| AFUA_7G03870 | Actin cytoskeleton-regulatory complex protein pan1                                                              | -1.70 | -1.04 | -1.43 | 2.40E-03 |
| AFUA_1G03600 | Probable glucan 1,3-beta-glucosidase A (EC 3.2.1.58) (Exo-1,3-beta-glucanase 1) (Exo-1,3-beta-glucanase A)      | -0.80 | -0.45 | -1.43 | 3.12E-05 |
| AFUA_6G09950 | Uncharacterized protein                                                                                         | 0.00  | -1.24 | -1.43 | 1.03E-04 |

|              |                                                                                                                                             |       |       |       |          |
|--------------|---------------------------------------------------------------------------------------------------------------------------------------------|-------|-------|-------|----------|
| AFUA_2G00820 | Extracellular GDSDL-like lipase/acylhydrolase, putative                                                                                     | -0.17 | -1.68 | -1.43 | 4.80E-05 |
| AFUA_3G01330 | Class II aldolase/adducin domain protein                                                                                                    | -0.67 | -0.73 | -1.43 | 1.39E-02 |
| AFUA_2G09800 | Uncharacterized protein                                                                                                                     | -2.51 | -1.75 | -1.43 | 9.85E-04 |
| AFUA_5G02330 | Ribonuclease mitogillin (EC 3.1.27.-) (Allergen Asp f I) (Allergen I/a) (IgE-binding ribotoxin) (Major allergen Asp f 1) (allergen Asp f 1) | 0.03  | -0.30 | -1.43 | 9.59E-03 |
| AFUA_3G00240 | TPR domain protein                                                                                                                          | -2.23 | 1.00  | -1.43 | 2.05E-05 |
| AFUA_5G10490 | Amidase, putative (EC 3.5.1.-)                                                                                                              | 1.83  | -0.86 | -1.42 | 3.08E-05 |
| AFUA_3G02253 | YjgH family protein                                                                                                                         | 0.11  | -0.91 | -1.41 | 3.41E-03 |
| AFUA_7G02170 | Peptidyl-prolyl cis-trans isomerase-like 4 (PPlase) (EC 5.2.1.8) (Rotamase)                                                                 | -2.38 | -2.47 | -1.41 | 4.54E-02 |
| AFUA_7G05650 | Glutamine-serine rich protein MS8, putative                                                                                                 | -0.10 | -1.39 | -1.40 | 2.22E-02 |
| AFUA_3G11920 | Dihydrodipicolinate synthetase family protein (EC 4.2.1.-)                                                                                  | 0.45  | -0.73 | -1.40 | 1.01E-04 |
| AFUA_6G13420 | Ubiquitin-like protein DskB, putative                                                                                                       | -0.51 | -0.72 | -1.38 | 9.07E-03 |
| AFUA_5G01260 | Ankyrin repeat protein                                                                                                                      | -1.29 | -0.27 | -1.38 | 3.55E-07 |
| AFUA_3G02270 | Catalase B (EC 1.11.1.6) (Antigenic catalase) (Slow catalase)                                                                               | -0.82 | -0.13 | -1.37 | 1.14E-06 |
| AFUA_6G11390 | 1,3-beta-glucanosyltransferase gel2 (EC 2.4.1.-) (Glucan elongating glucanosyltransferase 2)                                                | 0.73  | -0.39 | -1.37 | 2.14E-05 |
| AFUA_1G06580 | High expression lethality protein Hel10, putative                                                                                           | 1.24  | -1.04 | -1.37 | 4.99E-06 |
| AFUA_6G07390 | Isocitrate dehydrogenase LysB (EC 1.1.1.41)                                                                                                 | -2.92 | -1.46 | -1.36 | 9.63E-11 |
| AFUA_6G00510 | NADP-dependent alcohol dehydrogenase (EC 1.1.1.1)                                                                                           | -1.16 | -1.55 | -1.36 | 3.35E-06 |
| AFUA_4G11580 | Superoxide dismutase (EC 1.15.1.1)                                                                                                          | -0.57 | -1.08 | -1.35 | 2.30E-02 |
| AFUA_8G05580 | Acetyl-coA hydrolase Ach1, putative (EC 2.8.3.8)                                                                                            | -0.50 | -1.11 | -1.35 | 6.16E-07 |
| AFUA_5G04250 | Homocysteine synthase CysD (EC 2.5.1.49)                                                                                                    | -1.59 | -1.11 | -1.34 | 1.11E-05 |
| AFUA_1G06680 | VHS domain protein                                                                                                                          | -2.21 | -1.78 | -1.34 | 5.91E-04 |
| AFUA_6G14490 | Probable beta-glucosidase H (EC 3.2.1.21) (Beta-D-glucoside glucohydrolase H) (Cellobiase H) (Gentiobiase H)                                | -0.21 | -1.41 | -1.33 | 4.68E-05 |
| AFUA_2G01170 | 1,3-beta-glucanosyltransferase gel1 (EC 2.4.1.-) (Glucan elongating glucanosyltransferase 1)                                                | -0.21 | -0.27 | -1.33 | 3.43E-06 |
| AFUA_2G10600 | NADH-ubiquinone oxidoreductase 299 kDa subunit, putative (EC 1.6.5.3)                                                                       | -2.11 | -2.28 | -1.33 | 2.39E-07 |
| AFUA_6G07280 | ABC transporter (Adp1), putative                                                                                                            | 0.25  | -0.30 | -1.32 | 5.09E-05 |
| AFUA_6G07120 | Nuclear movement protein NudC                                                                                                               | -2.62 | -1.57 | -1.32 | 5.54E-05 |
| AFUA_1G16190 | Probable glycosidase crf1 (EC 3.2.-.-) (Crh-like protein 1) (allergen Asp f 9)                                                              | 0.97  | -0.67 | -1.32 | 5.97E-07 |
| AFUA_3G01920 | Acyl-CoA dehydrogenase, putative                                                                                                            | 1.11  | -0.77 | -1.31 | 7.17E-04 |
| AFUA_5G08090 | Pyridoxine biosynthesis protein                                                                                                             | -1.03 | -0.90 | -1.31 | 5.36E-06 |
| AFUA_2G11650 | Uncharacterized protein                                                                                                                     | -0.63 | -0.97 | -1.30 | 2.51E-04 |
| AFUA_2G08750 | Mitochondrial inner membrane nuclease Nuc1, putative (EC 3.1.30.-)                                                                          | 0.48  | -0.74 | -1.30 | 4.24E-04 |
| AFUA_5G04160 | NTF2 and RRM domain protein                                                                                                                 | -2.21 | -2.29 | -1.29 | 2.29E-03 |
| AFUA_4G04030 | Histidinol-phosphatase                                                                                                                      | -0.15 | -0.74 | -1.29 | 2.69E-04 |
| AFUA_6G03060 | MFS monosaccharide transporter, putative                                                                                                    | -1.37 | -0.85 | -1.28 | 1.54E-02 |
| AFUA_2G00760 | Probable pectate lyase A (EC 4.2.2.2)                                                                                                       | -0.92 | 0.03  | -1.28 | 6.43E-04 |
| AFUA_2G04610 | DUF967 domain protein                                                                                                                       | -0.85 | -1.13 | -1.27 | 9.14E-04 |
| AFUA_2G05750 | Agmatinase, putative (EC 3.5.3.11)                                                                                                          | 0.26  | -0.34 | -1.26 | 3.37E-02 |
| AFUA_3G02220 | DUF427 domain protein                                                                                                                       | -1.93 | -0.73 | -1.26 | 2.89E-03 |
| AFUA_6G07940 | Lactoylglutathione lyase (EC 4.4.1.5) (Glyoxalase I)                                                                                        | -0.74 | -0.88 | -1.25 | 1.00E-05 |
| AFUA_5G01340 | Lysophospholipase 2 (EC 3.1.1.5) (Phospholipase B 2)                                                                                        | -1.77 | -1.14 | -1.25 | 2.57E-06 |
| AFUA_3G10940 | Peroxisomal membrane protein receptor Pex19, putative                                                                                       | -1.50 | -0.96 | -1.25 | 1.21E-03 |
| AFUA_1G05040 | Protein mitochondrial targeting protein (Mas1), putative                                                                                    | -0.26 | -0.97 | -1.24 | 1.51E-05 |
| AFUA_3G06830 | Aspartate-semialdehyde dehydrogenase (EC 1.2.1.11)                                                                                          | -0.54 | -0.73 | -1.24 | 2.91E-04 |
| AFUA_4G08690 | Dihydrodipicolinate synthetase family protein (EC 4.2.1.-)                                                                                  | -0.44 | -0.64 | -1.23 | 1.13E-02 |
| AFUA_2G08150 | NEDD8-like protein (RubA), putative                                                                                                         | -2.17 | -1.48 | -1.23 | 4.94E-06 |
| AFUA_6G05030 | Polysaccharide deacetylase family protein                                                                                                   | -0.09 | -1.21 | -1.23 | 1.53E-03 |
| AFUA_2G05720 | Uncharacterized protein                                                                                                                     | -0.77 | -0.63 | -1.23 | 4.28E-03 |
| AFUA_3G08880 | Uncharacterized protein                                                                                                                     | -1.51 | -1.94 | -1.23 | 4.76E-05 |
| AFUA_2G01940 | Uncharacterized protein                                                                                                                     | 1.20  | 0.01  | -1.22 | 2.82E-02 |

|              |                                                                                                                                                                              |       |       |       |          |
|--------------|------------------------------------------------------------------------------------------------------------------------------------------------------------------------------|-------|-------|-------|----------|
| AFUA_4G10770 | Psi-producing oxygenase A (Fatty acid oxygenase ppoA) [Includes: Linoleate 8R-lipoxygenase (EC 1.13.11.60); 9,12-octadecadienoate 8-hydroperoxide 8R-isomerase (EC 5.4.4.5)] | 1.55  | -0.58 | -1.21 | 2.94E-06 |
| AFUA_4G07340 | Ubiquitin fusion degradation protein UfdB, putative                                                                                                                          | -1.65 | -1.55 | -1.21 | 2.91E-02 |
| AFUA_5G03990 | Vacuolar aspartyl aminopeptidase Lap4, putative                                                                                                                              | 0.66  | -0.49 | -1.20 | 1.16E-06 |
| AFUA_3G10750 | Probable acetate kinase (EC 2.7.2.1) (Acetokinase)                                                                                                                           | -0.67 | -0.77 | -1.20 | 2.23E-04 |
| AFUA_5G08050 | Probable Xaa-Pro aminopeptidase P (AMPP) (Aminopeptidase P) (EC 3.4.11.9) (Aminoacylproline aminopeptidase) (Prolidase)                                                      | -0.43 | -0.75 | -1.19 | 1.04E-04 |
| AFUA_6G07855 | Conserved threonine rich protein                                                                                                                                             | -1.21 | -0.42 | -1.18 | 1.90E-02 |
| AFUA_2G05240 | Uncharacterized protein                                                                                                                                                      | 0.05  | -0.38 | -1.18 | 5.24E-03 |
| AFUA_2G15770 | Cell wall biogenesis protein/glutathione transferase (Gto1), putative                                                                                                        | -0.46 | -1.14 | -1.18 | 6.34E-05 |
| AFUA_8G02850 | Actin binding protein, putative                                                                                                                                              | -1.40 | -0.91 | -1.18 | 4.94E-03 |
| AFUA_5G11320 | Thioredoxin                                                                                                                                                                  | -2.63 | -1.09 | -1.17 | 8.05E-05 |
| AFUA_1G08840 | Guanylate kinase (EC 2.7.4.8)                                                                                                                                                | -2.09 | -1.18 | -1.17 | 4.52E-06 |
| AFUA_6G10880 | Acyl-CoA dehydrogenase family protein (EC 1.3.99.-)                                                                                                                          | 2.58  | -0.22 | -1.17 | 2.02E-08 |
| AFUA_6G12480 | NGG1 interacting factor Nif3, putative                                                                                                                                       | -0.91 | -0.72 | -1.17 | 3.23E-04 |
| AFUA_5G07500 | Beta-lactamase family protein                                                                                                                                                | -0.19 | -0.58 | -1.16 | 1.28E-05 |
| AFUA_1G10110 | TIM-barrel enzyme family protein                                                                                                                                             | -1.10 | -0.95 | -1.16 | 2.05E-02 |
| AFUA_7G06050 | DNA damage-inducible protein 1                                                                                                                                               | -1.67 | -1.35 | -1.16 | 7.27E-03 |
| AFUA_3G10830 | Glutathione S-transferase Gsta (EC 2.5.1.18)                                                                                                                                 | -0.94 | -0.99 | -1.15 | 5.01E-05 |
| AFUA_4G03722 | Uncharacterized protein                                                                                                                                                      | -0.62 | -0.51 | -1.15 | 4.07E-03 |
| AFUA_1G03550 | Mitochondrial dihydroxy acid dehydratase, putative (EC 4.2.1.-)                                                                                                              | -0.26 | -0.63 | -1.14 | 8.65E-07 |
| AFUA_1G09830 | Hsc70 cochaperone (SGT), putative (EC 3.1.3.16)                                                                                                                              | -1.92 | -1.61 | -1.14 | 1.16E-04 |
| AFUA_7G01070 | Endo-1,4-beta-mannosidase                                                                                                                                                    | 0.19  | -0.86 | -1.14 | 1.90E-06 |
| AFUA_2G13290 | GYF domain protein                                                                                                                                                           | -1.40 | -1.66 | -1.13 | 1.99E-02 |
| AFUA_8G05570 | Transcription factor (Sin3), putative                                                                                                                                        | -1.43 | -1.95 | -1.13 | 5.73E-05 |
| AFUA_5G04290 | WW domain protein, putative                                                                                                                                                  | -0.47 | -0.88 | -1.13 | 6.13E-03 |
| AFUA_3G13010 | Zn-dependent hydrolase/oxidoreductase family protein, putative                                                                                                               | 2.08  | -0.14 | -1.12 | 3.42E-03 |
| AFUA_8G06550 | Carbonic anhydrase (EC 4.2.1.1) (Carbonate dehydratase)                                                                                                                      | -1.28 | -1.24 | -1.12 | 2.66E-04 |
| AFUA_6G14540 | Endo-1,3(4)-beta-glucanase, putative (EC 3.2.1.6)                                                                                                                            | -1.93 | -0.56 | -1.11 | 1.81E-02 |
| AFUA_7G05840 | Amidohydrolase family protein                                                                                                                                                | 0.09  | -0.82 | -1.10 | 1.56E-02 |
| AFUA_6G08960 | Proteasome subunit alpha type (EC 3.4.25.1)                                                                                                                                  | -0.57 | -0.77 | -1.10 | 2.52E-05 |
| AFUA_4G10010 | Hsp90 co-chaperone Cdc37                                                                                                                                                     | -2.06 | -1.27 | -1.10 | 4.25E-04 |
| AFUA_1G17250 | Conidial hydrophobin RodB                                                                                                                                                    | 0.59  | -0.40 | -1.09 | 1.14E-07 |
| AFUA_6G07430 | Pyruvate kinase (EC 2.7.1.40)                                                                                                                                                | -0.96 | -0.78 | -1.09 | 1.34E-07 |
| AFUA_3G11400 | Vacuolar protease A (EC 3.4.23.25) (Aspartic endopeptidase pep2) (Aspartic protease pep2)                                                                                    | -0.37 | -0.91 | -1.09 | 4.03E-07 |
| AFUA_8G04890 | Uncharacterized protein                                                                                                                                                      | 0.33  | -0.55 | -1.09 | 5.73E-03 |
| AFUA_2G04920 | Nuclear pore complex subunit Nup159, putative                                                                                                                                | 0.54  | -0.20 | -1.08 | 2.21E-02 |
| AFUA_2G00690 | Glucoamylase (EC 3.2.1.3) (1,4-alpha-D-glucan glucohydrolase) (Glucan 1,4-alpha-glucosidase)                                                                                 | 0.01  | 0.02  | -1.08 | 1.56E-04 |
| AFUA_6G09170 | 3-methyl-2-oxobutanoate hydroxymethyltransferase (EC 2.1.2.11)                                                                                                               | -0.71 | -0.99 | -1.08 | 9.24E-03 |
| AFUA_2G14520 | Hydrolase, putative (EC 3.-.-.-)                                                                                                                                             | -0.06 | -0.45 | -1.07 | 2.94E-06 |
| AFUA_4G11920 | Caffeine-induced death protein Cid2, putative                                                                                                                                | -0.06 | -0.23 | -1.07 | 9.82E-03 |
| AFUA_1G07500 | Uncharacterized protein                                                                                                                                                      | -0.84 | -0.84 | -1.07 | 6.76E-05 |
| AFUA_6G06350 | Proteasome endopeptidase complex (EC 3.4.25.1)                                                                                                                               | -0.35 | -0.58 | -1.07 | 1.11E-03 |
| AFUA_5G13180 | Agmatinase, putative (EC 3.5.3.11)                                                                                                                                           | 1.37  | 0.07  | -1.07 | 2.51E-03 |
| AFUA_6G08530 | Sister chromatid separation protein (Src1), putative                                                                                                                         | -2.89 | -0.99 | -1.07 | 5.71E-03 |
| AFUA_4G10050 | Calmodulin                                                                                                                                                                   | -0.90 | -0.62 | -1.06 | 7.68E-05 |
| AFUA_5G08370 | Polyubiquitin binding protein (Doa1/Ufd3), putative                                                                                                                          | -0.10 | -0.62 | -1.06 | 8.08E-03 |
| AFUA_6G09980 | Patched sphingolipid transporter (Ncr1), putative                                                                                                                            | 0.13  | -0.36 | -1.06 | 9.10E-04 |
| AFUA_2G16530 | Cyanate hydratase (Cyanase) (EC 4.2.1.104) (Cyanate hydrolase) (Cyanate lyase)                                                                                               | -0.58 | -0.98 | -1.05 | 7.36E-06 |
| AFUA_7G01510 | SNARE domain protein                                                                                                                                                         | -2.85 | -1.22 | -1.04 | 5.25E-05 |
| AFUA_1G17310 | MFS lactose permease, putative                                                                                                                                               | -2.01 | -1.93 | -1.04 | 3.30E-05 |
| AFUA_2G02100 | Dihydrolipoyl dehydrogenase (EC 1.8.1.4)                                                                                                                                     | -0.20 | -0.51 | -1.04 | 2.22E-07 |
| AFUA_2G16720 | DUF1237 domain protein                                                                                                                                                       | 0.03  | -0.46 | -1.03 | 4.55E-03 |
| AFUA_5G09130 | Polysaccharide deacetylase family protein                                                                                                                                    | 0.57  | -0.33 | -1.02 | 7.43E-04 |



|              |                                                                                                                                                                |       |       |       |          |
|--------------|----------------------------------------------------------------------------------------------------------------------------------------------------------------|-------|-------|-------|----------|
| AFUA_1G02540 | EF hand domain protein                                                                                                                                         | -1.32 | -1.29 | -1.02 | 3.44E-06 |
| AFUA_8G02770 | Cytidine deaminase (EC 3.5.4.5) (Cytidine aminohydrolase)                                                                                                      | -0.28 | -0.78 | -1.01 | 2.97E-02 |
| AFUA_8G02510 | Glycosyl hydrolase family 43 protein                                                                                                                           | 0.97  | -0.19 | -1.00 | 1.44E-03 |
| AFUA_3G14490 | Ketol-acid reductoisomerase (EC 1.1.1.86)                                                                                                                      | 0.66  | 0.35  | 1.01  | 2.80E-04 |
| AFUA_2G14470 | Oxidoreductase, FAD-binding, putative                                                                                                                          | 1.08  | 1.94  | 1.01  | 1.21E-04 |
| AFUA_1G09020 | Nuclear pore complex protein (SonA), putative                                                                                                                  | 2.02  | 1.20  | 1.02  | 2.25E-04 |
| AFUA_6G00260 | Phosphatidylserine decarboxylase family protein (EC 4.1.1.-)                                                                                                   | 1.42  | 1.79  | 1.02  | 3.32E-05 |
| AFUA_4G07910 | Mitochondrial presequence protease (EC 3.4.24.-)                                                                                                               | 1.18  | 1.01  | 1.04  | 7.78E-06 |
| AFUA_1G08940 | Pheromone-processing carboxypeptidase kex1 (EC 3.4.16.6) (Carboxypeptidase D)                                                                                  | 1.35  | 1.13  | 1.04  | 3.43E-02 |
| AFUA_5G06700 | Serine/threonine-protein phosphatase (EC 3.1.3.16)                                                                                                             | 1.32  | 0.64  | 1.04  | 4.23E-02 |
| AFUA_4G09140 | L-ornithine aminotransferase Car2, putative (EC 2.6.1.13)                                                                                                      | 1.51  | 1.35  | 1.05  | 2.77E-07 |
| AFUA_8G00430 | Uncharacterized protein                                                                                                                                        | 4.49  | 2.93  | 1.05  | 9.95E-07 |
| AFUA_3G08940 | Proteasome regulatory particle subunit (RpnL), putative                                                                                                        | -1.03 | 0.27  | 1.05  | 1.13E-02 |
| AFUA_6G02750 | Nascent polypeptide-associated complex subunit beta (NAC-beta) (Beta-NAC)                                                                                      | -0.07 | -1.80 | 1.06  | 1.12E-03 |
| AFUA_7G03940 | Alpha,alpha-trehalose phosphate synthase subunit TPS3, putative (EC 2.4.1.15)                                                                                  | 0.64  | -0.30 | 1.07  | 2.67E-02 |
| AFUA_2G04220 | Homogentisate 1,2-dioxygenase (HmgA), putative (EC 1.13.11.5)                                                                                                  | 2.37  | 2.00  | 1.07  | 3.81E-02 |
| AFUA_1G08760 | Delta-aminolevulinic acid dehydratase (EC 4.2.1.24)                                                                                                            | 2.38  | 0.77  | 1.07  | 2.27E-02 |
| AFUA_3G06890 | RRM domain protein                                                                                                                                             | 2.15  | 1.66  | 1.07  | 3.71E-04 |
| AFUA_8G02780 | Vacuolar protein sorting/targeting protein 10 (Carboxypeptidase Y receptor) (CPY receptor) (Sortilin vps10) (Vacuolar carboxypeptidase sorting receptor vps10) | 1.89  | 0.72  | 1.07  | 1.69E-03 |
| AFUA_4G06000 | 50S ribosomal protein L3                                                                                                                                       | 1.32  | -0.65 | 1.08  | 1.77E-02 |
| AFUA_3G13030 | T-complex protein 1 subunit gamma                                                                                                                              | 0.30  | -0.34 | 1.09  | 4.20E-02 |
| AFUA_6G12300 | RNP domain protein                                                                                                                                             | 1.69  | 0.90  | 1.09  | 8.91E-05 |
| AFUA_7G04380 | Alcohol dehydrogenase, putative (EC 1.1.1.1)                                                                                                                   | 1.17  | 1.16  | 1.10  | 4.69E-03 |
| AFUA_3G08660 | Isocitrate dehydrogenase [NADP] (EC 1.1.1.42)                                                                                                                  | 2.19  | 1.60  | 1.11  | 2.02E-07 |
| AFUA_4G08710 | Short chain dehydrogenase, putative (EC 1.-.-)                                                                                                                 | 1.52  | 1.69  | 1.11  | 1.14E-08 |
| AFUA_5G09930 | Uncharacterized protein                                                                                                                                        | 0.27  | 0.28  | 1.11  | 3.94E-03 |
| AFUA_4G11310 | Fructose-1,6-bisphosphatase Fbp1, putative (EC 3.1.3.11)                                                                                                       | 1.27  | 0.19  | 1.11  | 3.52E-03 |
| AFUA_8G04100 | N-acetylglucosamine-6-phosphate deacetylase (EC 3.5.1.25)                                                                                                      | 1.23  | 0.94  | 1.12  | 2.79E-02 |
| AFUA_1G13090 | Multifunctional tryptophan biosynthesis protein                                                                                                                | -0.34 | -0.01 | 1.12  | 3.94E-02 |
| AFUA_1G01680 | Branched-chain amino acid aminotransferase (EC 2.6.1.42)                                                                                                       | 2.36  | 1.53  | 1.12  | 2.97E-04 |
| AFUA_6G09070 | 3'(2'),5'-bisphosphate nucleotidase (EC 3.1.3.7)                                                                                                               | 0.39  | 0.89  | 1.13  | 3.12E-04 |
| AFUA_4G06930 | Methionine aminopeptidase 2-3 (MAP 2-3) (MetAP 2-3) (EC 3.4.11.18) (Peptidase M)                                                                               | -0.66 | 0.37  | 1.13  | 1.96E-02 |
| AFUA_2G07620 | Cystathionine beta-synthase (EC 4.2.1.22)                                                                                                                      | 0.94  | 0.66  | 1.14  | 2.67E-03 |
| AFUA_1G09960 | Kynurenine formamidase (KFA) (KFase) (EC 3.5.1.9) (Arylformamidase) (N-formylkynurenine formamidase) (FKF)                                                     | 2.37  | 1.73  | 1.14  | 9.20E-03 |
| AFUA_4G03830 | Uncharacterized protein                                                                                                                                        | -0.22 | 2.36  | 1.14  | 2.55E-05 |
| AFUA_6G14330 | 5-oxo-L-prolinase, putative (EC 3.5.2.9)                                                                                                                       | 1.09  | 0.30  | 1.15  | 3.96E-02 |
| AFUA_6G11310 | Bifunctional pyrimidine biosynthesis protein (PyrABCN), putative (EC 6.3.5.5)                                                                                  | 2.24  | 1.17  | 1.15  | 9.53E-06 |
| AFUA_3G10130 | Fructosyl amino acid oxidasesarcosine oxidase, putative                                                                                                        | 1.24  | 1.03  | 1.15  | 2.40E-02 |
| AFUA_5G04170 | Heat shock protein 90 (65 kDa IgE-binding protein) (Heat shock protein hsp1) (allergen Asp f 12)                                                               | -0.54 | 0.21  | 1.15  | 2.15E-04 |
| AFUA_3G03060 | Cell wall protein PhiA                                                                                                                                         | 1.68  | 0.08  | 1.16  | 3.16E-04 |
| AFUA_1G14170 | Probable beta-galactosidase A (EC 3.2.1.23) (Lactase A)                                                                                                        | 1.06  | 1.73  | 1.16  | 7.03E-03 |
| AFUA_2G08370 | Glutathione S-transferase, putative (EC 2.5.1.-)                                                                                                               | 2.35  | 0.51  | 1.16  | 5.25E-04 |
| AFUA_7G05720 | Acetyltransferase component of pyruvate dehydrogenase complex (EC 2.3.1.12)                                                                                    | -0.94 | -0.53 | 1.16  | 9.08E-03 |
| AFUA_5G02370 | Vacuolar ATP synthase catalytic subunit A, putative (EC 3.6.3.14)                                                                                              | 0.14  | 0.54  | 1.17  | 1.85E-04 |
| AFUA_3G06610 | Proteasome regulatory particle subunit (RpnE), putative                                                                                                        | 1.09  | -0.11 | 1.18  | 1.97E-04 |

|              |                                                                                                                                                                                        |       |       |      |          |
|--------------|----------------------------------------------------------------------------------------------------------------------------------------------------------------------------------------|-------|-------|------|----------|
| AFUA_4G11080 | Acetyl-coenzyme A synthetase (EC 6.2.1.1)                                                                                                                                              | 0.56  | 0.29  | 1.19 | 7.07E-03 |
| AFUA_3G08160 | ATP-dependent RNA helicase eIF4A (EC 3.6.4.13)<br>(Eukaryotic initiation factor 4A) (eIF-4A) (Translation<br>initiation factor 1)                                                      | 0.71  | -0.30 | 1.19 | 2.88E-04 |
| AFUA_4G11500 | 3-ketosteroid reductase                                                                                                                                                                | 0.87  | -0.07 | 1.19 | 4.89E-02 |
| AFUA_4G09840 | Kynureninase 2 (EC 3.7.1.3) (Biosynthesis of<br>nicotinic acid protein 5-2) (L-kynurenine hydrolase 2)                                                                                 | 1.89  | 1.03  | 1.19 | 1.40E-06 |
| AFUA_2G10170 | Uncharacterized protein                                                                                                                                                                | -0.56 | 0.20  | 1.19 | 1.01E-04 |
| AFUA_5G07740 | DSB repair complex subunit Ku70, putative                                                                                                                                              | 1.68  | 0.98  | 1.20 | 2.50E-03 |
| AFUA_6G02280 | Peroxiredoxin Asp f3 (Prx) (EC 1.11.1.15)<br>(Thioredoxin peroxidase) (TPx) (allergen Asp f 3)                                                                                         | 1.92  | 1.22  | 1.20 | 9.23E-10 |
| AFUA_2G12630 | Allergen Asp f 15 (Allergen Asp f 13) (allergen Asp f<br>15)                                                                                                                           | 1.74  | 0.84  | 1.21 | 7.76E-04 |
| AFUA_6G04740 | Actin Act1                                                                                                                                                                             | 0.85  | -0.22 | 1.21 | 3.55E-03 |
| AFUA_6G04920 | Formate dehydrogenase (FDH) (EC 1.2.1.2) (NAD-<br>dependent formate dehydrogenase)                                                                                                     | 1.83  | 1.45  | 1.22 | 2.23E-08 |
| AFUA_4G13760 | Uncharacterized protein                                                                                                                                                                | 2.28  | 1.38  | 1.22 | 1.74E-02 |
| AFUA_5G11230 | RAS small monomeric GTPase RasA                                                                                                                                                        | 1.17  | 0.92  | 1.22 | 6.77E-03 |
| AFUA_1G04950 | Serine/threonine-protein phosphatase (EC 3.1.3.16)                                                                                                                                     | 2.33  | 1.62  | 1.22 | 3.67E-08 |
| AFUA_1G14780 | BAP31 domain protein, putative                                                                                                                                                         | 1.35  | 0.09  | 1.25 | 4.36E-05 |
| AFUA_4G11770 | Glutathione transferase, putative                                                                                                                                                      | 0.91  | 1.27  | 1.25 | 1.16E-03 |
| AFUA_2G04930 | Uncharacterized protein                                                                                                                                                                | 1.69  | 1.61  | 1.26 | 4.59E-03 |
| AFUA_5G08910 | 3-methylcrotonyl-CoA carboxylase subunit alpha<br>(MccA), putative (EC 6.4.1.4)                                                                                                        | 2.09  | 1.12  | 1.26 | 7.48E-06 |
| AFUA_6G00750 | Pyruvate decarboxylase, putative (EC 4.1.1.1)                                                                                                                                          | 1.60  | 1.72  | 1.26 | 4.56E-04 |
| AFUA_6G08750 | Delta-1-pyrroline-5-carboxylate dehydrogenase PmC<br>(EC 1.2.1.88)                                                                                                                     | 2.10  | 1.56  | 1.26 | 3.94E-08 |
| AFUA_7G01430 | Opsin, putative                                                                                                                                                                        | 1.17  | 0.44  | 1.26 | 5.24E-04 |
| AFUA_4G03140 | Serine protein kinase Sky1, putative (EC 2.7.1.-)                                                                                                                                      | 2.32  | 0.75  | 1.26 | 9.40E-03 |
| AFUA_5G10280 | Oxidoreductase, acting on the CH-OH group of<br>donors, NAD or NADP as acceptor (EC 1.1.1.31)                                                                                          | 1.71  | 1.70  | 1.26 | 8.32E-03 |
| AFUA_2G07610 | Short chain dehydrogenase/reductase, putative                                                                                                                                          | 0.74  | 0.79  | 1.27 | 1.62E-03 |
| AFUA_8G05590 | Oxidoreductase, short chain dehydrogenase/reductase<br>family                                                                                                                          | 1.33  | 1.35  | 1.27 | 7.36E-05 |
| AFUA_1G04820 | Probable NAD(P)H-dependent D-xylose reductase<br>xyl1 (XR) (EC 1.1.1.307)                                                                                                              | 1.34  | 1.48  | 1.27 | 3.13E-08 |
| AFUA_7G06770 | Uncharacterized protein                                                                                                                                                                | -0.05 | -0.47 | 1.28 | 1.92E-05 |
| AFUA_5G08650 | Uncharacterized protein                                                                                                                                                                | 0.60  | 1.57  | 1.29 | 4.77E-02 |
| AFUA_4G13460 | SNF2 family helicase/ATPase, putative                                                                                                                                                  | 1.07  | -0.26 | 1.29 | 1.77E-02 |
| AFUA_7G06610 | Isochorismatase family hydrolase, putative                                                                                                                                             | -1.78 | -0.51 | 1.29 | 2.45E-03 |
| AFUA_8G04320 | NADH-ubiquinone oxidoreductase 178 kDa subunit,<br>putative                                                                                                                            | 0.90  | -0.21 | 1.29 | 2.19E-02 |
| AFUA_3G10000 | cAMP-dependent protein kinase regulatory subunit<br>(PKA regulatory subunit)                                                                                                           | -0.91 | 0.66  | 1.31 | 3.53E-06 |
| AFUA_1G13260 | Coatomer subunit epsilon                                                                                                                                                               | 0.97  | 1.37  | 1.31 | 1.66E-02 |
| AFUA_4G10510 | Mitochondrial chaperone Frataxin, putative                                                                                                                                             | -0.26 | 0.88  | 1.31 | 2.10E-05 |
| AFUA_5G06680 | 4-aminobutyrate transaminase GatA (EC 2.6.1.19)                                                                                                                                        | 1.48  | 1.64  | 1.32 | 1.25E-07 |
| AFUA_3G13620 | Cupin domain protein                                                                                                                                                                   | -0.46 | 2.20  | 1.33 | 1.15E-03 |
| AFUA_2G15760 | Poly(A)+ RNA transport protein (UbaA), putative (EC<br>6.3.2.19)                                                                                                                       | -1.11 | 0.63  | 1.33 | 2.53E-05 |
| AFUA_3G12950 | FAD binding domain protein (EC 1.5.3.-)                                                                                                                                                | 2.95  | 3.08  | 1.33 | 2.34E-02 |
| AFUA_7G04070 | Phospho-2-dehydro-3-deoxyheptonate aldolase (EC<br>2.5.1.54) (3-deoxy-D-arabino-heptulosonate 7-<br>phosphate synthase) (DAHP synthase) (Phospho-2-<br>keto-3-deoxyheptonate aldolase) | -0.08 | 0.48  | 1.34 | 5.46E-03 |
| AFUA_1G14850 | Acyl-CoA dehydrogenase, putative (EC 1.3.99.-)                                                                                                                                         | 2.04  | 1.69  | 1.34 | 2.97E-10 |
| AFUA_5G14790 | Phosphoenolpyruvate synthase, putative (EC 2.7.9.2)                                                                                                                                    | -0.36 | 0.69  | 1.34 | 1.68E-02 |
| AFUA_3G07150 | Succinate-semialdehyde dehydrogenase, putative (EC<br>1.2.1.24)                                                                                                                        | 0.96  | 1.03  | 1.36 | 1.42E-05 |
| AFUA_6G04970 | Phosphoserine aminotransferase (EC 2.6.1.52)                                                                                                                                           | 0.12  | 0.82  | 1.36 | 1.83E-07 |
| AFUA_1G02070 | Cytochrome C1/Cyt1, putative (EC 1.10.2.2)                                                                                                                                             | 1.45  | 0.49  | 1.37 | 2.80E-02 |
| AFUA_1G03070 | Transcription initiation factor TFIID subunit, putative                                                                                                                                | 1.27  | 0.46  | 1.37 | 1.73E-02 |
| AFUA_1G02980 | 6-phosphogluconolactonase, putative (EC 3.1.1.31)                                                                                                                                      | 0.18  | 0.77  | 1.37 | 2.00E-05 |
| AFUA_2G15190 | Ribulose-phosphate 3-epimerase (EC 5.1.3.1)                                                                                                                                            | 1.31  | 1.55  | 1.37 | 1.38E-07 |
| AFUA_1G05120 | COPII-coated vesicle membrane protein Erv46,<br>putative                                                                                                                               | 1.67  | -0.05 | 1.37 | 7.16E-03 |

|              |                                                                                                                                                                                                               |       |       |      |          |
|--------------|---------------------------------------------------------------------------------------------------------------------------------------------------------------------------------------------------------------|-------|-------|------|----------|
| AFUA_2G14960 | Thioredoxin, putative                                                                                                                                                                                         | 0.82  | 0.34  | 1.37 | 2.49E-02 |
| AFUA_2G15660 | Aldehyde dehydrogenase                                                                                                                                                                                        | 1.13  | 1.10  | 1.38 | 2.25E-04 |
| AFUA_3G12510 | Vesicular fusion ATPase, putative                                                                                                                                                                             | 3.29  | 1.34  | 1.38 | 5.57E-05 |
| AFUA_2G03490 | Calcium/calmodulin-dependent protein kinase, putative                                                                                                                                                         | 1.17  | 0.85  | 1.38 | 1.60E-02 |
| AFUA_3G11610 | Non-histone chromosomal protein 6                                                                                                                                                                             | 0.61  | 1.32  | 1.38 | 1.58E-05 |
| AFUA_3G08310 | 4-nitrophenylphosphatase (PNPPase) (EC 3.1.3.41)                                                                                                                                                              | 2.77  | 2.04  | 1.39 | 1.34E-02 |
| AFUA_5G03550 | Plasma membrane ATPase (EC 3.6.3.6)                                                                                                                                                                           | 0.72  | 0.56  | 1.40 | 2.42E-04 |
| AFUA_8G01670 | Catalase-peroxidase (CP) (EC 1.11.1.21) (Catalase-2) (Peroxidase/catalase)                                                                                                                                    | 2.91  | 2.01  | 1.41 | 4.44E-09 |
| AFUA_7G04180 | Amine oxidase (EC 1.4.3.-)                                                                                                                                                                                    | 3.46  | 2.15  | 1.42 | 5.87E-08 |
| AFUA_1G15720 | Importin beta-1 subunit                                                                                                                                                                                       | 1.07  | 1.05  | 1.43 | 4.24E-02 |
| AFUA_6G08050 | 6-phosphogluconate dehydrogenase, decarboxylating (EC 1.1.1.44)                                                                                                                                               | -0.47 | -0.74 | 1.43 | 1.45E-07 |
| AFUA_6G01790 | Uncharacterized protein                                                                                                                                                                                       | 1.04  | 0.89  | 1.43 | 2.72E-03 |
| AFUA_5G03930 | Alcohol dehydrogenase, putative (EC 1.-.-.-)                                                                                                                                                                  | -0.88 | -0.97 | 1.44 | 5.10E-06 |
| AFUA_1G14570 | Histidine biosynthesis trifunctional protein [Includes: Phosphoribosyl-AMP cyclohydrolase (EC 3.5.4.19); Phosphoribosyl-ATP pyrophosphohydrolase (EC 3.6.1.31); Histidinol dehydrogenase (HDH) (EC 1.1.1.23)] | 1.38  | 1.80  | 1.44 | 5.84E-08 |
| AFUA_2G16090 | Importin subunit alpha                                                                                                                                                                                        | 1.96  | 0.04  | 1.44 | 2.65E-02 |
| AFUA_2G12470 | Acetylornithine aminotransferase (EC 2.6.1.1)                                                                                                                                                                 | 0.53  | 0.72  | 1.44 | 1.04E-03 |
| AFUA_1G15140 | Mitochondrial phosphate carrier protein (Mir1), putative                                                                                                                                                      | 1.88  | 0.40  | 1.45 | 3.74E-04 |
| AFUA_7G02230 | mRNA binding post-transcriptional regulator (Csx1), putative                                                                                                                                                  | 1.96  | 1.06  | 1.46 | 4.21E-02 |
| AFUA_1G05390 | Mitochondrial ADP,ATP carrier protein (Ant), putative                                                                                                                                                         | 1.66  | 0.56  | 1.46 | 1.52E-03 |
| AFUA_3G05740 | Aldose 1-epimerase, putative (EC 5.1.3.3)                                                                                                                                                                     | 1.47  | 1.36  | 1.46 | 1.87E-02 |
| AFUA_2G12410 | Uncharacterized protein                                                                                                                                                                                       | 0.60  | 1.10  | 1.47 | 2.47E-05 |
| AFUA_1G04320 | 40S ribosomal protein S8                                                                                                                                                                                      | -1.27 | -1.39 | 1.48 | 3.23E-02 |
| AFUA_5G02240 | NAD dependent epimerase/dehydratase family protein (EC 1.1.1.133)                                                                                                                                             | 0.63  | 1.26  | 1.48 | 1.13E-05 |
| AFUA_3G01580 | GMC oxidoreductase, putative                                                                                                                                                                                  | 1.44  | 1.53  | 1.48 | 2.64E-02 |
| AFUA_6G09570 | Uncharacterized protein                                                                                                                                                                                       | -0.28 | 3.02  | 1.48 | 3.50E-04 |
| AFUA_1G05210 | G-protein complex gamma subunit GpgA                                                                                                                                                                          | 0.33  | 1.27  | 1.49 | 1.70E-03 |
| AFUA_4G06860 | Uncharacterized protein                                                                                                                                                                                       | 2.13  | 2.09  | 1.49 | 1.46E-04 |
| AFUA_2G01660 | Mitochondrial outer membrane translocase receptor (TOM70), putative                                                                                                                                           | 0.29  | -0.25 | 1.50 | 1.86E-02 |
| AFUA_5G12790 | 3-hydroxyisobutyryl-CoA hydrolase, mitochondrial (EC 3.1.2.4) (3-hydroxyisobutyryl-coenzyme A hydrolase)                                                                                                      | -0.79 | 0.49  | 1.51 | 3.15E-03 |
| AFUA_3G05370 | Dihydroliipoamide succinyltransferase, putative (EC 2.3.1.61)                                                                                                                                                 | 0.03  | 0.27  | 1.51 | 3.67E-04 |
| AFUA_5G02300 | Peroxidase, putative (EC 1.11.1.-)                                                                                                                                                                            | 2.77  | 1.19  | 1.51 | 2.77E-05 |
| AFUA_5G05500 | D-3-phosphoglycerate dehydrogenase (EC 1.1.1.95)                                                                                                                                                              | -0.44 | 0.99  | 1.51 | 1.70E-04 |
| AFUA_2G01030 | 1-aminocyclopropane-1-carboxylate deaminase, putative (EC 3.5.99.7)                                                                                                                                           | 1.39  | 1.42  | 1.51 | 6.06E-04 |
| AFUA_2G16010 | Prolyl-tRNA synthetase (EC 6.1.1.15)                                                                                                                                                                          | 0.30  | -0.75 | 1.52 | 5.29E-07 |
| AFUA_6G07520 | Cell wall integrity signaling protein Lsp1/Pil1, putative                                                                                                                                                     | -0.04 | -0.03 | 1.52 | 3.93E-04 |
| AFUA_5G03760 | Endochitinase A1 (EC 3.2.1.14) (Chitinase A1)                                                                                                                                                                 | 1.55  | 1.10  | 1.52 | 1.32E-03 |
| AFUA_6G08740 | 3-dehydroshikimate dehydratase, putative (EC 4.2.1.-)                                                                                                                                                         | 1.23  | 1.28  | 1.52 | 1.10E-03 |
| AFUA_1G07380 | Glutamate synthase Glt1, putative (EC 1.4.1.13)                                                                                                                                                               | 0.10  | 0.72  | 1.53 | 1.87E-05 |
| AFUA_6G11020 | 3-hydroxyisobutyrate dehydrogenase (EC 1.1.1.31)                                                                                                                                                              | 0.21  | 0.96  | 1.54 | 4.47E-02 |
| AFUA_4G11240 | Alpha-aminoadipate reductase large subunit, putative (EC 1.2.1.31)                                                                                                                                            | -0.12 | 0.91  | 1.54 | 3.55E-05 |
| AFUA_1G12610 | Hsp70 chaperone Hsp88                                                                                                                                                                                         | 1.37  | 1.56  | 1.54 | 1.28E-03 |
| AFUA_6G06900 | Rho GTPase Rho1                                                                                                                                                                                               | 2.00  | 1.49  | 1.54 | 6.27E-06 |
| AFUA_5G08940 | 3-methylcrotonyl-CoA carboxylase, beta subunit (MccB), putative (EC 6.4.1.3)                                                                                                                                  | 2.37  | 1.48  | 1.54 | 3.45E-03 |
| AFUA_4G10760 | Steroid alpha reductase family protein                                                                                                                                                                        | 2.80  | 0.90  | 1.55 | 7.90E-06 |
| AFUA_1G11535 | Glutaredoxin-like protein                                                                                                                                                                                     | 1.93  | 2.19  | 1.56 | 1.53E-03 |
| AFUA_7G05160 | Fumarylacetoacetate hydrolase family protein                                                                                                                                                                  | 2.01  | 2.33  | 1.56 | 1.16E-02 |
| AFUA_6G08930 | Protein fmp52, mitochondrial                                                                                                                                                                                  | 0.43  | 0.69  | 1.57 | 5.36E-03 |

|              |                                                                                                                                                                                                          |       |       |      |          |
|--------------|----------------------------------------------------------------------------------------------------------------------------------------------------------------------------------------------------------|-------|-------|------|----------|
| AFUA_4G11260 | Aldo-keto reductase, putative (EC 1.1.1.-)                                                                                                                                                               | 1.72  | 2.15  | 1.57 | 5.59E-07 |
| AFUA_4G04410 | 3-hydroxybutyryl-CoA dehydrogenase, putative (EC 1.1.1.157)                                                                                                                                              | 1.54  | 1.62  | 1.58 | 8.61E-05 |
| AFUA_5G12840 | Hydroxyacylglutathione hydrolase, putative (EC 3.1.2.6)                                                                                                                                                  | 1.91  | 1.96  | 1.58 | 2.01E-09 |
| AFUA_6G02230 | Phosphotransferase (EC 2.7.1.-)                                                                                                                                                                          | 0.59  | 0.98  | 1.58 | 9.15E-07 |
| AFUA_2G06000 | NAD-specific glutamate dehydrogenase (EC 1.4.1.2)                                                                                                                                                        | 0.33  | 0.54  | 1.58 | 8.08E-03 |
| AFUA_6G05110 | Mitochondrial import receptor subunit (Tom40), putative                                                                                                                                                  | 1.88  | 0.90  | 1.59 | 3.67E-04 |
| AFUA_4G09110 | Cytochrome c peroxidase, mitochondrial (CCP) (EC 1.11.1.5)                                                                                                                                               | 0.78  | 1.14  | 1.59 | 1.79E-04 |
| AFUA_6G04220 | Uncharacterized protein                                                                                                                                                                                  | 0.27  | 0.16  | 1.59 | 3.47E-03 |
| AFUA_5G08930 | Isovaleryl-CoA dehydrogenase IvdA, putative (EC 1.3.8.4)                                                                                                                                                 | 2.35  | 1.94  | 1.59 | 6.38E-07 |
| AFUA_1G05200 | Eukaryotic translation initiation factor 3 subunit A (eIF3a) (Eukaryotic translation initiation factor 3 110 kDa subunit homolog) (eIF3 p110) (Translation initiation factor eIF3, p110 subunit homolog) | 2.11  | 0.30  | 1.59 | 1.79E-03 |
| AFUA_4G14070 | Glycosyl transferase, putative (EC 2.-.-)                                                                                                                                                                | -0.24 | 1.23  | 1.60 | 4.77E-04 |
| AFUA_1G06820 | Uncharacterized protein                                                                                                                                                                                  | -0.98 | 1.15  | 1.60 | 3.42E-04 |
| AFUA_5G08240 | MutT/nudix family protein                                                                                                                                                                                | 0.64  | 2.17  | 1.60 | 9.03E-05 |
| AFUA_2G13630 | Aromatic aminotransferase Aro8, putative (EC 2.6.1.-)                                                                                                                                                    | 3.08  | 1.96  | 1.61 | 7.87E-04 |
| AFUA_1G14490 | Aminotransferase, putative                                                                                                                                                                               | 1.06  | 1.40  | 1.61 | 1.36E-02 |
| AFUA_3G03000 | Phosphatidylethanolamine-binding protein, putative                                                                                                                                                       | 1.03  | 1.47  | 1.62 | 1.71E-02 |
| AFUA_1G06390 | Elongation factor 1-alpha                                                                                                                                                                                | 2.55  | 0.67  | 1.62 | 2.21E-10 |
| AFUA_6G10830 | Serine/threonine-protein phosphatase (EC 3.1.3.16)                                                                                                                                                       | 1.03  | 0.77  | 1.62 | 3.21E-03 |
| AFUA_4G04520 | Succinate--CoA ligase [ADP-forming] subunit beta, mitochondrial (EC 6.2.1.5) (Succinyl-CoA synthetase beta chain) (SCS-beta)                                                                             | 0.64  | 0.96  | 1.62 | 2.26E-05 |
| AFUA_2G11560 | Galactose-1-phosphate uridylyltransferase (EC 2.7.7.12)                                                                                                                                                  | 1.97  | 1.56  | 1.62 | 1.77E-04 |
| AFUA_5G09920 | Peptidase, putative (EC 3.-.-)                                                                                                                                                                           | 1.81  | 2.04  | 1.63 | 2.44E-06 |
| AFUA_1G13195 | MICOS complex subunit MIC10                                                                                                                                                                              | 0.97  | 0.50  | 1.63 | 1.91E-04 |
| AFUA_1G14220 | Fibrillarin                                                                                                                                                                                              | 1.88  | -0.05 | 1.63 | 5.00E-07 |
| AFUA_3G07810 | Succinate dehydrogenase [ubiquinone] flavoprotein subunit, mitochondrial (EC 1.3.5.1)                                                                                                                    | 1.68  | 1.72  | 1.63 | 7.09E-11 |
| AFUA_2G00680 | Glycosyl hydrolase, putative                                                                                                                                                                             | -0.14 | 1.01  | 1.63 | 1.32E-02 |
| AFUA_4G13530 | Trehalase (EC 3.2.1.28) (Alpha-trehalose glucohydrolase)                                                                                                                                                 | 0.41  | 1.17  | 1.64 | 7.73E-03 |
| AFUA_1G04720 | C-8 sterol isomerase (Erg-1), putative                                                                                                                                                                   | 3.48  | 1.57  | 1.64 | 3.80E-04 |
| AFUA_5G07020 | Ribosome biogenesis ABC transporter Arb1, putative (EC 3.6.3.-)                                                                                                                                          | 2.39  | 0.37  | 1.64 | 2.14E-02 |
| AFUA_4G12840 | Methylthioribulose-1-phosphate dehydratase (MTRu-1-P dehydratase) (EC 4.2.1.109)                                                                                                                         | 1.74  | 1.75  | 1.64 | 1.23E-03 |
| AFUA_4G14100 | Glutathione S-transferase, putative                                                                                                                                                                      | 0.68  | 1.60  | 1.64 | 2.44E-02 |
| AFUA_5G07750 | Ferrochelatase (EC 4.99.1.1)                                                                                                                                                                             | 1.68  | 1.14  | 1.65 | 3.04E-02 |
| AFUA_1G08980 | UPF0160 domain protein MYG1, putative                                                                                                                                                                    | 1.65  | 1.77  | 1.65 | 1.28E-08 |
| AFUA_3G03020 | Phosphoglucomutase, putative                                                                                                                                                                             | 2.09  | 2.13  | 1.66 | 1.24E-04 |
| AFUA_3G14990 | Alpha/beta hydrolase, putative (EC 3.-.-)                                                                                                                                                                | 1.85  | 1.14  | 1.66 | 5.44E-05 |
| AFUA_2G00830 | Short chain dehydrogenase/reductase (EC 1.1.-.-)                                                                                                                                                         | 2.20  | 1.98  | 1.66 | 3.87E-03 |
| AFUA_4G10780 | Ubiquitin-protein ligase (Tom1), putative                                                                                                                                                                | 1.40  | 0.57  | 1.66 | 3.15E-02 |
| AFUA_1G10310 | RNase L inhibitor of the ABC superfamily, putative                                                                                                                                                       | 2.57  | 1.26  | 1.67 | 3.21E-03 |
| AFUA_2G04590 | Alcohol dehydrogenase, putative (EC 1.1.1.-)                                                                                                                                                             | 2.84  | 1.45  | 1.67 | 1.37E-04 |
| AFUA_1G09800 | Obg-like ATPase 1                                                                                                                                                                                        | 0.49  | 1.23  | 1.67 | 2.22E-05 |
| AFUA_1G02030 | Eukaryotic translation initiation factor 3 subunit B (eIF3b) (Eukaryotic translation initiation factor 3 90 kDa subunit homolog) (eIF3 p90) (Translation initiation factor eIF3 p90 subunit homolog)     | 1.64  | 1.28  | 1.67 | 5.02E-03 |
| AFUA_3G02240 | Aromatic-L-amino-acid decarboxylase, putative (EC 4.1.1.28)                                                                                                                                              | 2.24  | 2.44  | 1.68 | 7.17E-05 |
| AFUA_4G12850 | Calnexin homolog                                                                                                                                                                                         | 1.94  | 2.01  | 1.68 | 1.06E-05 |
| AFUA_1G10960 | Mago nashi domain protein                                                                                                                                                                                | 0.69  | 0.68  | 1.68 | 2.11E-02 |
| AFUA_1G13140 | G-protein complex alpha subunit GpaA/FadA                                                                                                                                                                | 1.24  | 0.75  | 1.69 | 9.24E-05 |
| AFUA_3G07160 | Class V chitinase, putative (EC 3.2.1.14)                                                                                                                                                                | -1.22 | 0.27  | 1.69 | 2.70E-08 |
| AFUA_6G11210 | 3-oxoacyl-(Acyl-carrier-protein) reductase (EC 1.1.1.100)                                                                                                                                                | 2.23  | 1.76  | 1.69 | 1.86E-05 |

|              |                                                                                               |       |      |      |          |
|--------------|-----------------------------------------------------------------------------------------------|-------|------|------|----------|
| AFUA_1G07200 | Mitochondrial cytochrome b2, putative (EC 1.1.2.3)                                            | 1.82  | 1.54 | 1.70 | 1.56E-06 |
| AFUA_2G09130 | NADH-ubiquinone dehydrogenase 24 kDa subunit, putative (EC 1.6.5.3)                           | 1.56  | 1.46 | 1.71 | 3.08E-05 |
| AFUA_2G00970 | Alcohol dehydrogenase, zinc-containing, putative (EC 1.1.1.1)                                 | -2.01 | 0.95 | 1.71 | 3.73E-04 |
| AFUA_6G13330 | RNA binding protein, putative                                                                 | 0.65  | 1.36 | 1.72 | 1.25E-06 |
| AFUA_6G04570 | Translation elongation factor eEF-1 subunit gamma, putative                                   | 1.92  | 1.53 | 1.72 | 4.63E-06 |
| AFUA_2G13530 | Translation elongation factor EF-2 subunit, putative                                          | 1.20  | 0.63 | 1.73 | 2.42E-07 |
| AFUA_1G07520 | Dimeric dihydrodiol dehydrogenase, putative (EC 1.-.-)                                        | -0.11 | 0.53 | 1.73 | 8.87E-03 |
| AFUA_1G10460 | Uncharacterized protein                                                                       | 2.27  | 1.93 | 1.73 | 9.81E-03 |
| AFUA_5G10780 | UDP-glucose 4-epimerase (EC 5.1.3.2)                                                          | -0.33 | 0.59 | 1.73 | 1.81E-04 |
| AFUA_3G08840 | Coatomer subunit alpha                                                                        | 1.41  | 0.96 | 1.73 | 5.58E-06 |
| AFUA_1G12800 | Isocitrate dehydrogenase [NAD] subunit, mitochondrial                                         | 0.88  | 0.43 | 1.73 | 1.07E-03 |
| AFUA_6G12250 | Succinyl-CoA:3-ketoacid-coenzyme A transferase (EC 2.8.3.5)                                   | 1.20  | 1.90 | 1.74 | 1.35E-02 |
| AFUA_2G10220 | Glycerol dehydrogenase, putative (EC 1.1.1.-)                                                 | 2.11  | 1.89 | 1.74 | 2.26E-05 |
| AFUA_2G04940 | KH domain RNA binding protein                                                                 | 1.23  | 0.41 | 1.74 | 1.66E-02 |
| AFUA_2G01590 | Non-classical export protein Nce102, putative                                                 | 0.79  | 0.01 | 1.77 | 1.22E-03 |
| AFUA_6G14460 | Haloalkanoic acid dehalogenase, putative (EC 3.8.1.-)                                         | 2.32  | 2.41 | 1.77 | 6.44E-05 |
| AFUA_2G02490 | Uncharacterized protein                                                                       | 1.74  | 1.54 | 1.77 | 3.09E-03 |
| AFUA_2G12180 | Lectin family integral membrane protein, putative                                             | 2.22  | 0.92 | 1.78 | 3.14E-02 |
| AFUA_6G04210 | Mannosyl-oligosaccharide glucosidase, putative                                                | 1.32  | 2.11 | 1.78 | 2.46E-05 |
| AFUA_2G11250 | Aryl-alcohol dehydrogenase Aad14, putative (EC 1.1.1.-)                                       | -1.07 | 0.70 | 1.79 | 4.39E-05 |
| AFUA_5G08130 | Protein transport protein Sec61 alpha subunit, putative                                       | 1.50  | 0.46 | 1.79 | 2.47E-03 |
| AFUA_7G05740 | Malate dehydrogenase (EC 1.1.1.37)                                                            | 1.99  | 2.20 | 1.80 | 2.64E-09 |
| AFUA_3G11280 | Class V chitinase, putative (EC 3.2.1.14)                                                     | 2.73  | 2.36 | 1.80 | 8.28E-08 |
| AFUA_5G08980 | NADH-ubiquinone oxidoreductase 9.5 kDa subunit, putative (EC 1.6.5.3)                         | 2.51  | 1.33 | 1.80 | 5.73E-03 |
| AFUA_2G10855 | Phosphoribosylglycinamide formyltransferase, putative (EC 2.1.2.2)                            | -0.79 | 0.80 | 1.80 | 8.32E-07 |
| AFUA_3G10460 | Nuclear transport factor NTF-2, putative                                                      | 1.98  | 1.40 | 1.80 | 6.04E-05 |
| AFUA_1G01750 | Peptidyl-prolyl cis-trans isomerase, putative (EC 5.2.1.8)                                    | 0.38  | 1.61 | 1.81 | 1.91E-02 |
| AFUA_5G06710 | DUF89 domain protein                                                                          | -0.36 | 1.07 | 1.81 | 1.10E-04 |
| AFUA_5G01970 | Glyceraldehyde-3-phosphate dehydrogenase (EC 1.2.1.12)                                        | 0.76  | 1.14 | 1.82 | 2.55E-05 |
| AFUA_4G11650 | Alpha-ketoglutarate dehydrogenase complex subunit Kgd1, putative (EC 1.2.4.2)                 | 0.89  | 1.10 | 1.82 | 1.61E-04 |
| AFUA_1G06610 | NADH-quinone oxidoreductase, 23 kDa subunit, putative (EC 1.6.5.3)                            | -0.16 | 0.09 | 1.82 | 1.68E-02 |
| AFUA_4G00290 | Succinyl-CoA synthetase beta subunit, putative (EC 6.2.1.4)                                   | 0.63  | 1.29 | 1.82 | 3.89E-02 |
| AFUA_1G05500 | 40S ribosomal protein S12                                                                     | 1.83  | 0.32 | 1.82 | 4.21E-06 |
| AFUA_5G02720 | Phosphoribosylformylglycinamide synthase (EC 6.3.5.3)                                         | 0.47  | 1.06 | 1.82 | 1.42E-02 |
| AFUA_7G02180 | UDP-N-acetylglucosamine pyrophosphorylase (EC 2.7.7.23)                                       | 0.56  | 0.87 | 1.82 | 6.32E-05 |
| AFUA_5G11610 | Protein arginine N-methyltransferase                                                          | 1.83  | 2.28 | 1.82 | 2.99E-02 |
| AFUA_3G12840 | Signal peptidase complex catalytic subunit sec11 (EC 3.4.21.89) (Signal peptidase I)          | 2.53  | 1.13 | 1.83 | 1.78E-02 |
| AFUA_5G03350 | Glutamine-dependent NAD(+) synthetase (EC 6.3.5.1) (NAD(+) synthase [glutamine-hydrolyzing])  | 0.47  | 1.51 | 1.84 | 5.06E-03 |
| AFUA_5G05480 | Rheb small monomeric GTPase RhbA                                                              | 1.88  | 1.54 | 1.84 | 1.32E-02 |
| AFUA_6G08780 | Proline utilization protein PrnX, putative (EC 4.3.1.12)                                      | 1.85  | 1.46 | 1.85 | 2.55E-03 |
| AFUA_5G13450 | Triosephosphate isomerase (EC 5.3.1.1)                                                        | 2.20  | 2.15 | 1.85 | 1.15E-06 |
| AFUA_1G11790 | Nucleoside hydrolase, putative (EC 3.2.2.-)                                                   | 2.30  | 2.29 | 1.85 | 3.45E-03 |
| AFUA_4G07580 | Translation initiation factor EF-2 gamma subunit, putative                                    | 1.81  | 0.08 | 1.85 | 2.37E-05 |
| AFUA_8G01420 | Quinone oxidoreductase, putative (EC 1.6.5.5)                                                 | 1.55  | 1.38 | 1.85 | 5.05E-04 |
| AFUA_2G11260 | 3-isopropylmalate dehydratase (EC 4.2.1.33) (Alpha-IPM isomerase) (Isopropylmalate isomerase) | 0.96  | 0.72 | 1.85 | 3.27E-03 |
| AFUA_8G04550 | Sulfonate biosynthesis enzyme, putative (EC 4.4.1.-)                                          | 0.80  | 1.63 | 1.86 | 3.19E-02 |

|              |                                                                                      |       |       |      |          |
|--------------|--------------------------------------------------------------------------------------|-------|-------|------|----------|
| AFUA_4G10240 | Small nuclear ribonucleoprotein SmD3, putative                                       | 2.93  | 0.33  | 1.86 | 1.92E-03 |
| AFUA_7G01880 | Nicotinate phosphoribosyltransferase (EC 6.3.4.21)                                   | -0.48 | 1.81  | 1.87 | 8.56E-04 |
| AFUA_4G11340 | Saccharopine dehydrogenase Lys9, putative (EC 1.5.1.7)                               | 1.06  | 0.52  | 1.87 | 2.32E-05 |
| AFUA_1G11960 | Alternative NADH-dehydrogenase (EC 1.6.99.3)                                         | 2.48  | 0.73  | 1.88 | 5.93E-06 |
| AFUA_5G05460 | Cytosine deaminase-uracil phosphoribosyltransferase fusion protein (EC 2.4.2.9)      | 0.80  | -0.36 | 1.88 | 3.92E-03 |
| AFUA_3G00680 | Amine oxidase (EC 1.4.3.-)                                                           | 3.44  | 1.35  | 1.88 | 1.22E-03 |
| AFUA_2G09030 | Dipeptidyl-peptidase 5 (EC 3.4.14.-) (Dipeptidyl-peptidase V) (DPP V) (DppV)         | 2.08  | 3.28  | 1.89 | 1.63E-07 |
| AFUA_8G04710 | Xylosidase, putative (EC 3.2.1.37)                                                   | 1.81  | 1.72  | 1.89 | 6.76E-04 |
| AFUA_8G04810 | Casein kinase, putative (EC 2.7.11.1)                                                | 1.23  | 1.84  | 1.89 | 4.01E-02 |
| AFUA_2G13295 | Aminotransferase family protein (LoIT), putative                                     | 3.15  | 1.64  | 1.91 | 1.90E-03 |
| AFUA_1G02410 | RuvB-like helicase 2 (EC 3.6.4.12)                                                   | 0.59  | -0.36 | 1.91 | 8.45E-06 |
| AFUA_4G08550 | Pantetheine-phosphate adenylyltransferase family protein                             | 0.33  | 0.97  | 1.92 | 7.70E-03 |
| AFUA_5G05820 | Homoserine kinase (EC 2.7.1.39)                                                      | 1.95  | 0.36  | 1.92 | 3.41E-03 |
| AFUA_3G07300 | ABC multidrug transporter, putative (EC 3.6.3.-)                                     | 1.49  | 1.40  | 1.92 | 1.46E-03 |
| AFUA_6G06460 | Fumarylacetoacetate hydrolase family protein                                         | 1.77  | 1.86  | 1.92 | 9.09E-05 |
| AFUA_4G10730 | RuvB-like helicase 1 (EC 3.6.4.12)                                                   | 0.44  | -0.28 | 1.92 | 4.88E-03 |
| AFUA_3G02430 | Uncharacterized protein                                                              | 1.34  | 2.01  | 1.93 | 8.65E-07 |
| AFUA_2G02950 | Aldehyde reductase, putative (EC 1.1.1.-)                                            | 2.75  | 2.40  | 1.93 | 5.49E-06 |
| AFUA_4G11290 | Proteasome activator subunit 4, putative                                             | 1.35  | 1.17  | 1.93 | 9.16E-04 |
| AFUA_4G07700 | Clathrin heavy chain                                                                 | 1.01  | 1.28  | 1.93 | 7.89E-07 |
| AFUA_4G03120 | Mitochondrial cytochrome b2, putative (EC 1.1.2.3)                                   | 1.81  | 1.78  | 1.94 | 1.46E-05 |
| AFUA_8G04730 | Oligopeptidase family protein                                                        | 0.64  | 0.95  | 1.94 | 3.87E-06 |
| AFUA_1G13370 | Aflatoxin B1-aldehyde reductase GliO-like, putative (EC 1.1.1.-)                     | 1.21  | 1.00  | 1.94 | 2.87E-03 |
| AFUA_1G08810 | Glycerol-3-phosphate dehydrogenase (EC 1.1.5.3)                                      | 1.32  | 0.84  | 1.94 | 5.22E-03 |
| AFUA_5G10370 | Succinate dehydrogenase [ubiquinone] iron-sulfur subunit, mitochondrial (EC 1.3.5.1) | 1.70  | 1.70  | 1.94 | 1.61E-03 |
| AFUA_1G12250 | Mitochondrial hypoxia responsive domain protein                                      | 3.82  | 1.09  | 1.94 | 2.25E-02 |
| AFUA_5G06500 | Acyl-CoA dehydrogenase family protein (EC 1.3.99.-)                                  | 2.25  | 1.85  | 1.96 | 8.24E-05 |
| AFUA_3G10760 | Phosphoketolase, putative                                                            | 0.95  | 1.18  | 1.96 | 3.89E-03 |
| AFUA_3G10110 | Electron transfer flavoprotein-ubiquinone oxidoreductase (EC 1.5.5.1)                | 1.69  | 0.95  | 1.96 | 2.07E-02 |
| AFUA_2G12450 | Hydroxymethylglutaryl-CoA lyase (EC 4.1.3.4)                                         | 2.07  | 1.98  | 1.96 | 1.61E-05 |
| AFUA_4G14450 | Mannitol 2-dehydrogenase (M2DH) (MDH) (EC 1.1.1.67)                                  | 1.63  | 1.31  | 1.97 | 1.45E-06 |
| AFUA_4G08410 | Mannose-6-phosphate isomerase, class I (EC 5.3.1.8)                                  | 1.96  | 2.75  | 1.97 | 8.29E-06 |
| AFUA_5G09640 | Conserved fungal protein                                                             | 1.96  | 2.01  | 1.97 | 6.03E-04 |
| AFUA_1G09810 | Translation machinery-associated protein 20                                          | 1.30  | 2.29  | 1.98 | 1.31E-04 |
| AFUA_6G02630 | ATP-dependent RNA helicase sub2 (EC 3.6.4.13)                                        | 1.68  | 0.23  | 1.98 | 3.08E-03 |
| AFUA_4G05900 | Uncharacterized protein                                                              | 2.52  | 0.96  | 1.98 | 3.18E-03 |
| AFUA_7G01320 | Beta-mannosidase B (EC 3.2.1.25) (Mannanase B) (Mannase B)                           | 1.67  | 2.03  | 1.98 | 7.67E-05 |
| AFUA_4G06910 | Outer mitochondrial membrane protein porin                                           | 2.08  | 0.22  | 1.99 | 5.95E-07 |
| AFUA_4G11840 | Glyoxylate reductase (EC 1.1.1.95)                                                   | 2.33  | 2.28  | 1.99 | 1.68E-04 |
| AFUA_6G06500 | Actin-related protein 2/3 complex subunit 1A, putative                               | 0.87  | 1.42  | 1.99 | 2.53E-05 |
| AFUA_1G12370 | DUF255 domain protein                                                                | 0.65  | 0.88  | 1.99 | 1.59E-02 |
| AFUA_5G02690 | C6 transcription factor, putative                                                    | 0.58  | -0.16 | 1.99 | 1.07E-02 |
| AFUA_8G00230 | Verrucologen synthase (EC 1.14.11.38) (Fumitremorgin biosynthesis protein F)         | 1.49  | 2.12  | 2.00 | 2.82E-04 |
| AFUA_4G03660 | Acid phosphatase, putative (EC 3.1.3.2)                                              | 1.73  | 2.31  | 2.00 | 1.27E-04 |
| AFUA_4G08480 | 26S proteasome regulatory subunit Rpn2, putative                                     | 1.76  | 0.03  | 2.01 | 1.73E-02 |
| AFUA_2G17430 | Oxidoreductase 2-nitropropane dioxygenase family, putative (EC 1.13.11.-)            | 1.09  | 1.52  | 2.01 | 3.46E-03 |
| AFUA_1G10130 | Adenosylhomocysteinase (EC 3.3.1.1)                                                  | 1.30  | 1.01  | 2.02 | 3.28E-05 |
| AFUA_1G11730 | ADP-ribosylation factor, putative                                                    | 2.32  | 0.94  | 2.02 | 3.18E-05 |
| AFUA_1G01490 | NACHT domain protein                                                                 | 2.42  | 1.20  | 2.02 | 5.24E-07 |
| AFUA_2G07970 | 60S ribosomal protein L19                                                            | 0.73  | 0.74  | 2.02 | 3.21E-03 |
| AFUA_6G04010 | Chromosome segregation protein Cse1, putative                                        | 1.43  | 1.60  | 2.03 | 7.04E-05 |
| AFUA_2G17070 | Defective in cullin neddylation protein                                              | 3.34  | 2.92  | 2.04 | 2.08E-03 |

|              |                                                                                                                                              |       |       |      |          |
|--------------|----------------------------------------------------------------------------------------------------------------------------------------------|-------|-------|------|----------|
| AFUA_4G08580 | Mitochondrial peroxiredoxin Prx1, putative (EC 1.11.1.7)                                                                                     | -1.02 | 0.45  | 2.05 | 7.03E-07 |
| AFUA_8G01210 | Enoyl-CoA hydratase/isomerase family protein (EC 4.2.1.17)                                                                                   | -0.38 | 2.33  | 2.05 | 5.72E-03 |
| AFUA_6G02470 | Fumarate hydratase, putative (EC 4.2.1.2)                                                                                                    | 1.78  | 1.92  | 2.06 | 3.59E-06 |
| AFUA_4G07690 | Phosphoribosylaminoimidazolecarboxamide formyltransferase/IMP cyclohydrolase                                                                 | 0.20  | 1.65  | 2.06 | 7.82E-08 |
| AFUA_4G05910 | NADH-ubiquinone oxidoreductase 21 kDa subunit, putative (EC 1.6.5.3)                                                                         | 0.38  | 1.07  | 2.06 | 4.78E-02 |
| AFUA_5G03480 | Methylenetetrahydrofolate reductase (EC 1.5.1.20)                                                                                            | 1.32  | 1.59  | 2.06 | 4.56E-02 |
| AFUA_5G10640 | Tyrosine--tRNA ligase (EC 6.1.1.1) (Tyrosyl-tRNA synthetase)                                                                                 | 1.31  | 0.16  | 2.06 | 2.72E-02 |
| AFUA_4G11720 | Phosphatidyl synthase                                                                                                                        | 0.57  | 1.36  | 2.06 | 3.69E-08 |
| AFUA_1G15860 | Coatomer subunit delta, putative                                                                                                             | 2.76  | 0.78  | 2.06 | 8.40E-04 |
| AFUA_5G02030 | Cleavage and polyadenylation specific factor 5                                                                                               | 2.60  | 2.18  | 2.07 | 1.02E-06 |
| AFUA_1G12940 | Mitogen-activated protein kinase hog1 (MAP kinase hog1) (EC 2.7.11.24)                                                                       | 1.43  | 1.34  | 2.07 | 8.26E-03 |
| AFUA_7G05360 | FACT complex subunit pob3 (Facilitates chromatin transcription complex subunit pob3)                                                         | 1.86  | 1.41  | 2.07 | 6.65E-04 |
| AFUA_3G11430 | Arginase (EC 3.5.3.1)                                                                                                                        | 0.44  | 1.75  | 2.07 | 7.83E-03 |
| AFUA_1G06700 | Metacaspase-1A (EC 3.4.22.-)                                                                                                                 | 3.64  | 2.10  | 2.07 | 1.94E-03 |
| AFUA_6G13440 | Choline sulfatase, putative (EC 3.1.6.6)                                                                                                     | 3.50  | 1.09  | 2.07 | 9.70E-04 |
| AFUA_2G18030 | Catalase easC (EC 1.11.-.-) (Ergot alkaloid synthesis protein C)                                                                             | 1.23  | 1.60  | 2.07 | 1.29E-04 |
| AFUA_2G14030 | Arginyl-tRNA synthetase (EC 6.1.1.19)                                                                                                        | 0.35  | 1.91  | 2.08 | 2.78E-07 |
| AFUA_8G04090 | Choline oxidase (CodA), putative (EC 1.1.3.17)                                                                                               | 2.82  | 2.36  | 2.08 | 1.64E-08 |
| AFUA_3G11640 | Homoserine dehydrogenase (HDH) (EC 1.1.1.3)                                                                                                  | -0.21 | 1.76  | 2.09 | 2.66E-06 |
| AFUA_6G08630 | MICOS complex subunit                                                                                                                        | 0.53  | 0.88  | 2.09 | 3.78E-02 |
| AFUA_3G12690 | Uncharacterized protein                                                                                                                      | 2.09  | 2.55  | 2.09 | 4.39E-10 |
| AFUA_3G13140 | Methyltransferase, putative                                                                                                                  | 2.16  | 2.14  | 2.09 | 1.35E-03 |
| AFUA_3G10480 | Meiotic sister chromatid recombination protein Ish1/Msc1, putative                                                                           | 0.76  | 1.56  | 2.10 | 3.29E-06 |
| AFUA_2G13250 | Tryptophan synthase (EC 4.2.1.20)                                                                                                            | 1.57  | 1.05  | 2.10 | 4.86E-03 |
| AFUA_2G07720 | Cytochrome b5, putative                                                                                                                      | 0.33  | 2.14  | 2.11 | 2.06E-02 |
| AFUA_7G01830 | UTP-glucose-1-phosphate uridylyltransferase Ugp1, putative                                                                                   | 0.00  | 1.35  | 2.11 | 4.43E-05 |
| AFUA_2G17920 | Uncharacterized protein                                                                                                                      | 2.15  | 2.58  | 2.12 | 1.62E-06 |
| AFUA_2G01330 | Exosome complex subunit Rrp46, putative (EC 3.1.13. )                                                                                        | -0.13 | 1.01  | 2.12 | 2.83E-02 |
| AFUA_2G05910 | Phosphotransferase (EC 2.7.1.-)                                                                                                              | -0.01 | 1.20  | 2.12 | 8.68E-07 |
| AFUA_6G07770 | Alanine aminotransferase, putative (EC 2.6.1.-)                                                                                              | 2.58  | 2.69  | 2.13 | 3.86E-08 |
| AFUA_3G13450 | Oxidoreductase, short chain dehydrogenase/reductase family superfamily (EC 1.1.1.100)                                                        | 0.99  | 1.69  | 2.13 | 5.97E-03 |
| AFUA_2G10660 | Mannitol-1-phosphate 5-dehydrogenase (MIPDH) (MPD) (MPDH) (EC 1.1.1.17)                                                                      | 2.25  | 2.46  | 2.14 | 2.73E-08 |
| AFUA_4G08070 | Glycylpeptide N-tetradecanoyltransferase (EC 2.3.1.97) (Myristoyl-CoA:protein N-myristoyltransferase) (NMT) (Peptide N-myristoyltransferase) | 0.76  | 1.26  | 2.14 | 1.19E-02 |
| AFUA_1G11120 | Uncharacterized protein                                                                                                                      | 2.27  | 1.76  | 2.14 | 5.04E-03 |
| AFUA_1G09230 | DUF1000 domain protein                                                                                                                       | 2.18  | 1.93  | 2.15 | 2.28E-04 |
| AFUA_5G06130 | Succinate--CoA ligase [ADP-forming] subunit alpha, mitochondrial (EC 6.2.1.5) (Succinyl-CoA synthetase subunit alpha) (SCS-alpha)            | -0.10 | 1.42  | 2.15 | 4.63E-07 |
| AFUA_5G02350 | Hydrolase, carbon-nitrogen family, putative                                                                                                  | 2.87  | 1.32  | 2.15 | 1.12E-02 |
| AFUA_2G09090 | Prohibitin, putative                                                                                                                         | 2.14  | 0.81  | 2.15 | 1.23E-03 |
| AFUA_5G10610 | Ubiquinol-cytochrome c reductase iron-sulfur subunit (EC 1.10.2.2)                                                                           | 2.21  | 2.19  | 2.15 | 3.15E-07 |
| AFUA_7G00350 | Uncharacterized protein                                                                                                                      | 0.62  | 1.86  | 2.15 | 3.63E-03 |
| AFUA_1G15020 | 40S ribosomal protein S5, putative                                                                                                           | 0.51  | -0.18 | 2.15 | 9.30E-07 |
| AFUA_1G12340 | Carnitine acetyl transferase                                                                                                                 | 1.02  | 1.01  | 2.16 | 3.89E-03 |
| AFUA_1G04540 | NADH-cytochrome b5 reductase 2 (EC 1.6.2.2) (Mitochondrial cytochrome b reductase)                                                           | 1.81  | 1.61  | 2.16 | 3.37E-06 |
| AFUA_6G03540 | Malate synthase (EC 2.3.3.9)                                                                                                                 | 0.38  | 2.10  | 2.16 | 1.22E-07 |
| AFUA_2G14810 | Oxidoreductase, putative                                                                                                                     | -0.70 | 0.11  | 2.16 | 6.56E-04 |
| AFUA_4G10330 | CaaX farnesyltransferase beta subunit Ram1 (EC 2.5.1.58)                                                                                     | 1.83  | 2.27  | 2.17 | 3.61E-04 |
| AFUA_5G02530 | Ribokinase (EC 2.7.1.15)                                                                                                                     | 1.86  | 2.75  | 2.17 | 6.59E-05 |

|              |                                                                                             |       |       |      |          |
|--------------|---------------------------------------------------------------------------------------------|-------|-------|------|----------|
| AFUA_4G14470 | Probable decarboxylase tpcK (EC 1.-.-) (Trypacidin synthesis protein K)                     | 0.27  | 2.58  | 2.17 | 3.04E-03 |
| AFUA_1G10870 | Urea hydro-lyase/cyanamide hydratase, putative (EC 4.2.1.-)                                 | 0.63  | 0.64  | 2.18 | 4.23E-02 |
| AFUA_2G02920 | Alpha/beta hydrolase, putative (EC 3.-.-)                                                   | 2.26  | 2.22  | 2.18 | 4.64E-05 |
| AFUA_3G08650 | C1 tetrahydrofolate synthase, putative (EC 6.3.4.3)                                         | 0.76  | 1.45  | 2.18 | 3.94E-07 |
| AFUA_1G10970 | Coatomer subunit beta (Beta-coat protein)                                                   | 1.74  | 0.71  | 2.18 | 9.06E-03 |
| AFUA_4G00180 | Fatty acid oxygenase, putative (EC 1.-.-)                                                   | 0.87  | 1.39  | 2.19 | 7.54E-03 |
| AFUA_5G05680 | Peptide chain release factor eRF/aRF, subunit 1                                             | 1.89  | 1.57  | 2.19 | 8.67E-06 |
| AFUA_5G12250 | Posttranscriptional regulation nuclease (Mkt1), putative                                    | 1.24  | 1.75  | 2.19 | 5.16E-05 |
| AFUA_2G15980 | 3' exoribonuclease family protein                                                           | 0.02  | 1.24  | 2.20 | 4.73E-03 |
| AFUA_5G08290 | Aldo-keto reductase, putative (EC 1.1.1.-)                                                  | 2.60  | 2.88  | 2.20 | 4.21E-05 |
| AFUA_5G09400 | Carbonyl reductase, putative (EC 1.-.-)                                                     | 2.11  | 2.49  | 2.20 | 2.04E-04 |
| AFUA_3G05350 | Histone H2B                                                                                 | 1.24  | 1.37  | 2.21 | 5.77E-07 |
| AFUA_4G04660 | Proteasome regulatory particle subunit Rpt6, putative                                       | 1.32  | 0.28  | 2.21 | 9.10E-03 |
| AFUA_5G09080 | Transcription factor (SPT8), putative                                                       | 0.93  | 1.83  | 2.21 | 1.87E-02 |
| AFUA_6G12580 | Anthranilate synthase component I, putative (EC 4.1.3.27)                                   | 1.37  | 1.63  | 2.21 | 2.10E-07 |
| AFUA_2G11290 | Orotate phosphoribosyltransferase (EC 2.4.2.10)                                             | -0.51 | 1.15  | 2.21 | 5.62E-08 |
| AFUA_7G05930 | Metallopeptidase MepB (EC 3.4.24.-)                                                         | 2.34  | 2.35  | 2.22 | 4.82E-07 |
| AFUA_4G03450 | NmrA-like family protein                                                                    | -0.34 | 0.85  | 2.22 | 3.64E-05 |
| AFUA_5G13510 | Cell cycle control protein (Cwf8), putative                                                 | 3.40  | 2.49  | 2.22 | 1.58E-06 |
| AFUA_5G07000 | NAD binding Rossmann fold oxidoreductase, putative (EC 1.-.-)                               | 1.19  | 2.13  | 2.22 | 4.38E-07 |
| AFUA_2G17560 | Hydroxynaphthalene reductase arp2 (EC 1.1.-.-) (Conidial pigment biosynthesis oxidase arp2) | 1.38  | 1.98  | 2.22 | 3.81E-07 |
| AFUA_4G09010 | mRNA splicing protein (Prp39), putative                                                     | 1.05  | 1.27  | 2.22 | 2.27E-02 |
| AFUA_2G08970 | Thiamine biosynthetic bifunctional enzyme, putative                                         | 2.41  | 2.37  | 2.22 | 1.51E-05 |
| AFUA_1G13330 | Arp2/3 complex subunit (Arp2), putative                                                     | 0.87  | 1.12  | 2.22 | 4.22E-04 |
| AFUA_4G09250 | Uncharacterized protein                                                                     | 2.50  | 0.81  | 2.23 | 2.14E-04 |
| AFUA_4G13120 | Glutamine synthetase (EC 6.3.1.2)                                                           | -0.37 | 1.01  | 2.23 | 6.13E-05 |
| AFUA_6G03100 | Uncharacterized protein                                                                     | 0.36  | 1.75  | 2.23 | 7.03E-07 |
| AFUA_3G11750 | Oxysterol binding protein (Osh5), putative                                                  | 1.98  | 1.18  | 2.24 | 1.90E-04 |
| AFUA_6G07710 | Mitochondrial dicarboxylate carrier protein, putative                                       | 2.77  | 2.44  | 2.24 | 4.59E-03 |
| AFUA_2G12530 | Carnitine acetyl transferase                                                                | 2.17  | 2.17  | 2.24 | 1.23E-05 |
| AFUA_7G01000 | Aldehyde dehydrogenase, putative (EC 1.2.1.3)                                               | 2.92  | 2.41  | 2.24 | 6.42E-09 |
| AFUA_3G14690 | Aminotransferase, putative (EC 2.-.-)                                                       | 3.71  | 1.68  | 2.25 | 1.24E-02 |
| AFUA_3G07790 | Argininosuccinate lyase (EC 4.3.2.1)                                                        | 2.64  | 2.47  | 2.26 | 6.17E-07 |
| AFUA_2G00590 | Glutathione S-transferase, putative (EC 2.5.1.18)                                           | 2.81  | 1.86  | 2.26 | 1.59E-03 |
| AFUA_6G08020 | ABC transporter, putative                                                                   | 1.44  | 2.23  | 2.27 | 8.59E-04 |
| AFUA_6G08840 | Beta-mannosidase A (EC 3.2.1.25) (Mannase A)                                                | 0.14  | 0.75  | 2.27 | 5.60E-03 |
| AFUA_4G13700 | Threonyl-tRNA synthetase, putative (EC 6.1.1.3)                                             | 2.15  | 1.98  | 2.27 | 1.50E-05 |
| AFUA_6G10480 | Peptidyl-prolyl cis-trans isomerase-like 3 (PPLase) (EC 5.2.1.8) (Rotamase)                 | 2.18  | 1.64  | 2.28 | 4.96E-03 |
| AFUA_1G04620 | Alcohol dehydrogenase, zinc-containing, putative (EC 1.1.1.-)                               | 1.52  | 1.12  | 2.28 | 9.14E-03 |
| AFUA_1G15450 | Adenylosuccinate synthetase (AMPSase) (AdSS) (EC 6.3.4.4) (IMP--aspartate ligase)           | 2.78  | 2.76  | 2.28 | 2.20E-10 |
| AFUA_1G03400 | Protein transport protein sec23                                                             | 2.63  | 0.89  | 2.28 | 5.12E-05 |
| AFUA_5G11560 | Arp2/3 complex subunit (Arp3), putative                                                     | 1.00  | 1.47  | 2.29 | 2.40E-04 |
| AFUA_5G03360 | NADH pyrophosphatase, putative (EC 3.6.1.-)                                                 | 2.39  | 1.95  | 2.29 | 1.45E-02 |
| AFUA_1G16523 | 40S ribosomal protein S25, putative                                                         | -0.68 | -1.03 | 2.30 | 1.88E-06 |
| AFUA_1G09480 | Vacuolar protein sorting-associated protein 29                                              | 0.98  | 2.02  | 2.31 | 3.96E-02 |
| AFUA_6G13300 | GTP-binding nuclear protein                                                                 | 2.70  | 2.02  | 2.31 | 8.90E-06 |
| AFUA_3G09910 | Phosphatidylinositol transporter, putative                                                  | 1.29  | 1.59  | 2.31 | 5.91E-05 |
| AFUA_1G02670 | Arp2/3 complex 34 kDa subunit                                                               | 1.26  | 1.18  | 2.31 | 1.01E-04 |
| AFUA_3G10310 | Acetolactate synthase (EC 2.2.1.6)                                                          | 1.11  | 2.68  | 2.31 | 4.10E-07 |
| AFUA_5G07170 | Nucleoside-diphosphate-sugar epimerase, putative                                            | 2.32  | 2.57  | 2.32 | 5.15E-03 |
| AFUA_4G09660 | Secretory component protein shr3, putative                                                  | 0.78  | 1.23  | 2.32 | 4.55E-02 |
| AFUA_2G05790 | Dolichyl-diphosphooligosaccharide--protein glycosyltransferase subunit 1 (EC 2.4.99.18)     | 2.29  | 1.70  | 2.33 | 1.32E-09 |
| AFUA_6G02140 | Peptidyl-prolyl cis-trans isomerase-like 1 (PPLase) (EC 5.2.1.8) (Rotamase)                 | 2.26  | 1.98  | 2.33 | 3.51E-03 |



|              |                                                                                                           |       |       |      |          |
|--------------|-----------------------------------------------------------------------------------------------------------|-------|-------|------|----------|
| AFUA_3G06210 | Phosphoribosyl-aminoimidazole-succinocarboxamide synthase (EC 6.3.2.6)                                    | -0.11 | 1.53  | 2.33 | 2.96E-06 |
| AFUA_8G07110 | Alanyl-tRNA synthetase, putative (EC 6.1.1.7)                                                             | 1.67  | 2.06  | 2.33 | 2.91E-02 |
| AFUA_2G02580 | HAD superfamily hydrolase, putative                                                                       | 2.74  | 2.58  | 2.37 | 2.41E-05 |
| AFUA_3G08430 | Mitochondrial phosphate carrier protein, putative                                                         | 3.04  | 1.57  | 2.38 | 5.50E-03 |
| AFUA_2G05740 | Rho GTPase ModA, putative                                                                                 | 2.65  | 1.95  | 2.38 | 1.24E-03 |
| AFUA_6G10600 | NEDD8-activating enzyme E1 regulatory subunit                                                             | 2.06  | 1.76  | 2.38 | 5.36E-04 |
| AFUA_3G04020 | Conserved mitochondrial protein                                                                           | 2.50  | 2.02  | 2.39 | 6.53E-04 |
| AFUA_6G11680 | Thiamine pyrophosphate enzyme, putative (EC 4.1.-.-)                                                      | 2.47  | 2.28  | 2.39 | 5.77E-05 |
| AFUA_1G13780 | Histone H4                                                                                                | 1.92  | 1.56  | 2.39 | 1.19E-03 |
| AFUA_3G11690 | Fructose-bisphosphate aldolase, class II (EC 4.1.2.13)                                                    | 2.85  | 2.74  | 2.40 | 1.96E-10 |
| AFUA_5G02480 | Glycogen [starch] synthase (EC 2.4.1.11)                                                                  | 1.58  | 1.39  | 2.40 | 6.34E-05 |
| AFUA_2G14850 | Enoyl-CoA hydratase/isomerase family protein (EC 4.2.-.-)                                                 | 3.46  | 2.02  | 2.40 | 1.40E-04 |
| AFUA_2G11150 | Rab GDP dissociation inhibitor                                                                            | 1.18  | 1.90  | 2.40 | 1.79E-04 |
| AFUA_2G11850 | 60S ribosomal protein L3 (allergen Asp f 23)                                                              | -0.85 | -0.17 | 2.41 | 3.44E-06 |
| AFUA_2G04310 | Argininosuccinate synthase (EC 6.3.4.5)                                                                   | 2.05  | 1.20  | 2.41 | 2.55E-03 |
| AFUA_2G03720 | Peptidyl-prolyl cis-trans isomerase (PPIase) (EC 5.2.1.8)                                                 | 2.37  | 2.56  | 2.42 | 3.59E-07 |
| AFUA_5G02410 | ATP-dependent RNA helicase fall (EC 3.6.4.13)                                                             | 2.16  | 0.34  | 2.42 | 8.11E-03 |
| AFUA_5G01450 | NADH-dependent flavin oxidoreductase, putative (EC 1.-.-.-)                                               | 1.38  | 0.75  | 2.43 | 2.37E-02 |
| AFUA_4G06140 | Dipeptidyl peptidase 3 (EC 3.4.14.4) (Dipeptidyl aminopeptidase III) (Dipeptidyl peptidase III)           | 2.72  | 2.86  | 2.43 | 1.13E-06 |
| AFUA_1G13710 | Isoleucyl-tRNA synthetase, cytoplasmic (EC 6.1.1.5)                                                       | 1.43  | 1.69  | 2.43 | 1.72E-06 |
| AFUA_6G11260 | Ribosomal protein L26                                                                                     | -0.95 | -0.57 | 2.43 | 2.45E-02 |
| AFUA_5G08270 | HAD superfamily hydrolase, putative                                                                       | 3.17  | 3.28  | 2.43 | 1.08E-07 |
| AFUA_5G03520 | Uncharacterized protein                                                                                   | 2.15  | 2.36  | 2.43 | 6.41E-07 |
| AFUA_2G06040 | Actin cortical patch component, putative                                                                  | 3.11  | 3.03  | 2.43 | 5.46E-09 |
| AFUA_4G10800 | 40S ribosomal protein S6                                                                                  | 1.50  | 0.17  | 2.43 | 1.34E-05 |
| AFUA_3G08380 | Inorganic diphosphatase, putative (EC 3.6.1.1)                                                            | 2.61  | 2.82  | 2.44 | 1.92E-10 |
| AFUA_1G02090 | Quinone oxidoreductase, putative (EC 1.6.5.5)                                                             | 2.48  | 2.22  | 2.44 | 7.49E-06 |
| AFUA_5G05450 | 40S ribosomal protein S1                                                                                  | 1.05  | 0.25  | 2.44 | 8.15E-08 |
| AFUA_1G07010 | Phosphatidate cytidyltransferase (EC 2.7.7.41)                                                            | 3.12  | 0.81  | 2.44 | 1.15E-02 |
| AFUA_6G00770 | Probable arabinan endo-1,5-alpha-L-arabinosidase C (EC 3.2.1.99) (Endo-1,5-alpha-L-arabinanase C) (ABN C) | 3.60  | 3.10  | 2.44 | 3.91E-04 |
| AFUA_4G06380 | Sterol carrier protein, putative                                                                          | 0.71  | 2.15  | 2.45 | 7.99E-07 |
| AFUA_2G05510 | Mitochondrial F1F0 ATP synthase subunit F (Atp17), putative (EC 3.6.3.14)                                 | 1.89  | 1.16  | 2.45 | 1.23E-04 |
| AFUA_4G00610 | Aryl-alcohol dehydrogenase, putative (EC 1.1.-.-)                                                         | 1.62  | 2.71  | 2.45 | 1.28E-03 |
| AFUA_5G11040 | Pantoate--beta-alanine ligase (EC 6.3.2.1)                                                                | 1.20  | 2.08  | 2.46 | 1.10E-04 |
| AFUA_2G04520 | Fe-containing alcohol dehydrogenase, putative (EC 1.1.1.-)                                                | 1.84  | 2.61  | 2.46 | 2.08E-05 |
| AFUA_5G09860 | S-formylglutathione hydrolase (EC 3.1.2.12)                                                               | 2.85  | 2.31  | 2.46 | 8.48E-06 |
| AFUA_4G00740 | Uncharacterized protein                                                                                   | 1.97  | 1.06  | 2.46 | 2.53E-06 |
| AFUA_8G04340 | Cystathionine gamma-lyase (EC 4.4.1.8)                                                                    | 2.17  | 1.72  | 2.46 | 1.22E-03 |
| AFUA_3G09320 | Serine hydroxymethyltransferase (EC 2.1.2.1)                                                              | 2.34  | 3.63  | 2.46 | 2.26E-10 |
| AFUA_4G14530 | Glutathione S-transferase-like protein tpcF (EC 2.5.1.-) (Trypacidin synthesis protein E)                 | 0.83  | 3.02  | 2.46 | 2.76E-06 |
| AFUA_3G04210 | Fatty acid synthase alpha subunit FasA                                                                    | 0.72  | 0.76  | 2.47 | 5.17E-05 |
| AFUA_4G12870 | Methylmalonate-semialdehyde dehydrogenase, putative (EC 1.2.1.27)                                         | 2.43  | 2.51  | 2.47 | 1.72E-06 |
| AFUA_1G06240 | Riboflavin synthase, alpha subunit (EC 2.5.1.9)                                                           | 2.97  | 2.97  | 2.47 | 1.10E-04 |
| AFUA_3G04220 | Fatty acid synthase beta subunit, putative                                                                | 1.30  | 1.38  | 2.47 | 5.78E-09 |
| AFUA_3G10970 | Protein-tyrosine phosphatase 2 (EC 3.1.3.48)                                                              | 2.63  | 1.09  | 2.48 | 3.79E-02 |
| AFUA_1G05850 | Erythromycin esterase, putative                                                                           | -0.16 | 1.22  | 2.48 | 6.61E-03 |
| AFUA_1G12920 | Alpha-1,4 glucan phosphorylase (EC 2.4.1.1)                                                               | 2.31  | 2.77  | 2.48 | 3.21E-07 |
| AFUA_4G04350 | DEAD helicases superfamily protein (Aquarius), putative                                                   | 2.26  | 1.27  | 2.48 | 1.26E-02 |
| AFUA_2G11020 | Triosephosphate isomerase (EC 5.3.1.1)                                                                    | 1.77  | 2.19  | 2.49 | 5.43E-05 |
| AFUA_4G12600 | Phosphoribosyl-aminoimidazole carboxylase (EC 4.1.1.21)                                                   | 2.05  | 2.13  | 2.49 | 3.52E-06 |
| AFUA_2G09180 | Coatomer subunit zeta, putative                                                                           | 1.38  | 1.53  | 2.49 | 2.59E-02 |

|              |                                                                                                                                                                 |       |      |      |          |
|--------------|-----------------------------------------------------------------------------------------------------------------------------------------------------------------|-------|------|------|----------|
| AFUA_8G04080 | Betaine aldehyde dehydrogenase (BadH), putative (EC 1.2.1.8)                                                                                                    | 2.84  | 3.00 | 2.50 | 1.85E-06 |
| AFUA_3G12560 | Allantoicase Alc, putative (EC 3.5.3.4)                                                                                                                         | -0.32 | 1.93 | 2.50 | 3.74E-05 |
| AFUA_1G14400 | Hydroxyisocaproate dehydrogenase, putative (EC 1.1.1.95)                                                                                                        | 0.68  | 1.61 | 2.50 | 7.64E-03 |
| AFUA_5G11430 | Quinone oxidoreductase, putative (EC 1.6.5.5)                                                                                                                   | 0.95  | 2.55 | 2.51 | 1.45E-09 |
| AFUA_1G11770 | COPII-coated vesicle protein SurF4/Erv29, putative                                                                                                              | 1.20  | 0.65 | 2.51 | 2.85E-03 |
| AFUA_6G13180 | CECR1 family adenosine deaminase, putative                                                                                                                      | 1.74  | 1.99 | 2.52 | 3.02E-05 |
| AFUA_4G07650 | Peptidyl-prolyl cis-trans isomerase B (PPIase B) (EC 5.2.1.8) (Rotamase B)                                                                                      | 1.62  | 2.05 | 2.52 | 4.36E-03 |
| AFUA_7G02070 | AIF-like mitochondrial oxidoreductase (Nfml), putative                                                                                                          | 0.65  | 2.37 | 2.52 | 2.26E-08 |
| AFUA_4G08600 | Aldehyde dehydrogenase, putative (EC 1.2.1.3)                                                                                                                   | 1.14  | 2.06 | 2.52 | 5.58E-06 |
| AFUA_4G07050 | L-lactate dehydrogenase (EC 1.13.12.4)                                                                                                                          | 2.73  | 2.66 | 2.52 | 2.06E-06 |
| AFUA_3G08640 | Eukaryotic translation initiation factor 3 subunit I (eIF3i) (Eukaryotic translation initiation factor 3 39 kDa subunit homolog) (eIF-3 39 kDa subunit homolog) | 2.38  | 1.42 | 2.53 | 2.45E-04 |
| AFUA_4G13500 | Aldehyde dehydrogenase                                                                                                                                          | 2.15  | 1.42 | 2.54 | 6.03E-05 |
| AFUA_6G04660 | Centromere protein Cse4, putative                                                                                                                               | 2.02  | 1.28 | 2.55 | 1.63E-02 |
| AFUA_1G02820 | NADH-quinone oxidoreductase Pst2, putative                                                                                                                      | -0.37 | 2.10 | 2.55 | 9.33E-06 |
| AFUA_8G07190 | Uncharacterized protein                                                                                                                                         | 1.05  | 1.18 | 2.56 | 8.55E-04 |
| AFUA_2G11940 | Adenylosuccinate lyase (ASL) (EC 4.3.2.2) (Adenylosuccinase)                                                                                                    | 1.02  | 0.94 | 2.56 | 1.32E-06 |
| AFUA_5G11660 | Autophagy-related protein 18                                                                                                                                    | 2.64  | 2.18 | 2.57 | 1.54E-04 |
| AFUA_3G10090 | Dihydroneopterin aldolase domain protein (EC 4.1.2.25)                                                                                                          | 0.71  | 2.20 | 2.58 | 2.09E-05 |
| AFUA_7G02280 | U5 snRNP complex subunit, putative                                                                                                                              | 2.93  | 2.45 | 2.59 | 8.28E-03 |
| AFUA_5G01440 | Allergen, putative (EC 1.-.-)                                                                                                                                   | 2.60  | 2.66 | 2.59 | 2.39E-07 |
| AFUA_6G11430 | Aldehyde dehydrogenase AldA, putative (EC 1.2.1.3)                                                                                                              | 2.11  | 2.91 | 2.59 | 4.34E-10 |
| AFUA_6G12630 | Leucyl-tRNA synthetase (EC 6.1.1.4)                                                                                                                             | 0.81  | 1.47 | 2.60 | 8.15E-04 |
| AFUA_4G08880 | Glucose-6-phosphate 1-epimerase (EC 5.1.3.15)                                                                                                                   | -0.32 | 1.46 | 2.61 | 7.00E-05 |
| AFUA_3G13900 | Glutamate-cysteine ligase Gcs1, putative                                                                                                                        | 0.85  | 1.49 | 2.61 | 2.19E-03 |
| AFUA_6G07760 | Proteasome regulatory particle subunit (RpnG), putative                                                                                                         | 2.46  | 1.02 | 2.61 | 2.81E-05 |
| AFUA_4G04680 | FGGY-family carbohydrate kinase, putative                                                                                                                       | 0.81  | 1.82 | 2.61 | 1.73E-05 |
| AFUA_6G02860 | Isocitrate lyase (EC 4.1.3.1)                                                                                                                                   | 2.62  | 2.79 | 2.62 | 3.59E-07 |
| AFUA_3G11710 | Saccharopine dehydrogenase [NAD(+), L-lysine-forming] (SDH) (EC 1.5.1.7) (Lysine--2-oxoglutarate reductase)                                                     | 1.46  | 1.93 | 2.62 | 3.46E-05 |
| AFUA_7G00360 | UDP-galactose 4-epimerase, putative (EC 5.1.3.-)                                                                                                                | 2.71  | 1.81 | 2.62 | 5.05E-08 |
| AFUA_1G12890 | 60S ribosomal protein L5, putative                                                                                                                              | 0.76  | 0.02 | 2.64 | 4.72E-09 |
| AFUA_6G13550 | Ribosomal protein S13p/S18e                                                                                                                                     | 0.35  | 0.31 | 2.64 | 7.41E-05 |
| AFUA_6G12530 | Translation initiation factor eif-2b epsilon subunit, putative (EC 2.7.7.-)                                                                                     | 2.26  | 0.53 | 2.64 | 1.72E-04 |
| AFUA_5G14310 | Short chain dehydrogenase/reductase family protein                                                                                                              | 1.74  | 0.36 | 2.65 | 1.11E-02 |
| AFUA_6G10660 | ATP citrate lyase subunit (Acl), putative (EC 6.2.1.5)                                                                                                          | 0.19  | 1.91 | 2.65 | 1.23E-04 |
| AFUA_5G03770 | Lipase, putative (EC 3.1.1.3)                                                                                                                                   | 1.66  | 1.62 | 2.66 | 1.25E-03 |
| AFUA_2G13710 | NADH-ubiquinone oxidoreductase 49 kDa subunit, putative (EC 1.6.5.3)                                                                                            | 0.42  | 0.93 | 2.66 | 2.07E-02 |
| AFUA_4G07590 | CaaX prenyl protease Ste24 (EC 3.4.24.84)                                                                                                                       | 3.20  | 1.22 | 2.67 | 7.52E-04 |
| AFUA_8G01390 | Glycosyl hydrolase, putative                                                                                                                                    | 1.55  | 2.14 | 2.67 | 1.14E-04 |
| AFUA_2G13860 | Histone H4                                                                                                                                                      | 2.56  | 2.36 | 2.68 | 1.57E-07 |
| AFUA_3G02257 | Uncharacterized protein                                                                                                                                         | 1.22  | 1.29 | 2.68 | 3.05E-04 |
| AFUA_5G11720 | 26S proteasome regulatory subunit Mts4, putative                                                                                                                | 0.63  | 1.44 | 2.69 | 8.14E-05 |
| AFUA_3G12100 | Trehalose synthase (Ccg-9), putative (EC 2.4.1.-)                                                                                                               | 2.57  | 2.42 | 2.69 | 2.04E-05 |
| AFUA_2G16200 | Uracil phosphoribosyltransferase (EC 2.4.2.9)                                                                                                                   | 2.20  | 2.25 | 2.69 | 1.16E-02 |
| AFUA_2G17580 | Scytalone dehydratase arp1 (EC 4.2.1.94) (Conidial pigment biosynthesis oxidase arp1)                                                                           | 0.58  | 2.49 | 2.69 | 2.24E-07 |
| AFUA_5G10560 | Cytochrome c oxidase subunit V                                                                                                                                  | 2.91  | 1.58 | 2.70 | 1.01E-06 |
| AFUA_1G09660 | Mitochondrial 2-oxodicarboxylate carrier protein, putative                                                                                                      | 3.45  | 1.64 | 2.72 | 2.28E-05 |
| AFUA_6G07720 | Phosphoenolpyruvate carboxykinase AcuF (EC 4.1.1.49)                                                                                                            | 2.81  | 2.33 | 2.72 | 2.44E-07 |
| AFUA_2G15430 | Sorbitol/xylulose reductase Sou1-like, putative (EC 1.-.-)                                                                                                      | 1.75  | 2.56 | 2.72 | 6.09E-04 |
| AFUA_1G11710 | Ribosomal protein                                                                                                                                               | 2.47  | 0.57 | 2.72 | 2.45E-06 |

|              |                                                                                                 |       |       |      |          |
|--------------|-------------------------------------------------------------------------------------------------|-------|-------|------|----------|
| AFUA_7G00700 | Aldo-keto reductase (AKR13), putative (EC 1.1.1.-)                                              | 1.86  | 1.56  | 2.73 | 2.34E-05 |
| AFUA_2G01100 | Pirin domain protein, putative                                                                  | 0.33  | 1.73  | 2.73 | 9.67E-04 |
| AFUA_6G10900 | UV-endonuclease UVE-1                                                                           | 1.70  | 2.63  | 2.73 | 1.88E-03 |
| AFUA_5G01290 | Zinc-binding oxidoreductase, putative (EC 1.-.-)                                                | 2.61  | 2.82  | 2.74 | 3.61E-04 |
| AFUA_4G07710 | Pyruvate carboxylase (EC 6.4.1.1)                                                               | 1.40  | 1.84  | 2.74 | 9.52E-08 |
| AFUA_6G13410 | Pre-mRNA-splicing factor rsel                                                                   | 2.20  | 2.89  | 2.76 | 1.49E-09 |
| AFUA_6G10650 | ATP citrate lyase, subunit 1, putative (EC 2.3.3.8)                                             | 1.30  | 2.00  | 2.76 | 3.74E-08 |
| AFUA_8G01100 | Melibiase subfamily, putative (EC 3.2.1.22)                                                     | 1.22  | 1.62  | 2.77 | 4.36E-04 |
| AFUA_6G02440 | 60S ribosomal protein L24a                                                                      | 0.27  | 0.41  | 2.77 | 1.05E-03 |
| AFUA_6G14100 | Mitochondrial carnitine:acyl carnitine carrier, putative                                        | 3.46  | 2.04  | 2.78 | 2.40E-04 |
| AFUA_4G07150 | Cytochrome c subunit, putative                                                                  | 3.45  | 2.41  | 2.78 | 1.10E-06 |
| AFUA_6G05090 | RNA polymerase II Elongator subunit, putative                                                   | -0.19 | 1.92  | 2.79 | 3.47E-03 |
| AFUA_1G09100 | 60S ribosomal protein L9, putative                                                              | 0.09  | -0.26 | 2.81 | 1.62E-06 |
| AFUA_1G16270 | Xylitol dehydrogenase XdhB (EC 1.1.1.14)                                                        | 2.08  | 2.20  | 2.82 | 1.45E-03 |
| AFUA_2G03290 | 14-3-3 family protein ArtA, putative                                                            | 0.67  | 2.21  | 2.82 | 1.90E-07 |
| AFUA_1G02570 | Aspartyl-tRNA synthetase, cytoplasmic (EC 6.1.1.12)                                             | 3.37  | 1.41  | 2.82 | 2.34E-05 |
| AFUA_3G04170 | Pyruvate dehydrogenase E1 beta subunit PdbA, putative (EC 1.2.4.1)                              | 0.96  | 1.49  | 2.82 | 9.42E-09 |
| AFUA_4G05870 | Oxidoreductase, short-chain dehydrogenase/reductase family                                      | 3.37  | 3.29  | 2.83 | 6.10E-06 |
| AFUA_6G06750 | 14-3-3 family protein                                                                           | 0.77  | 2.32  | 2.84 | 2.93E-06 |
| AFUA_3G00370 | Phosphoketolase, putative (EC 4.1.2.-)                                                          | 0.51  | 1.88  | 2.84 | 3.50E-05 |
| AFUA_2G07380 | 60S ribosomal protein L18                                                                       | 0.87  | 0.05  | 2.85 | 7.06E-04 |
| AFUA_1G13280 | Mannose-6-phosphate isomerase (EC 5.3.1.8) (Phosphohexomutase) (Phosphomannose isomerase) (PMI) | 2.00  | 2.77  | 2.85 | 5.16E-06 |
| AFUA_1G06960 | Pyruvate dehydrogenase E1 component subunit alpha (EC 1.2.4.1)                                  | 1.08  | 1.40  | 2.85 | 5.87E-08 |
| AFUA_1G05630 | 40S ribosomal protein S3, putative                                                              | 1.32  | 0.34  | 2.85 | 3.90E-08 |
| AFUA_7G00860 | Lipoxygenase, putative (EC 1.13.11.-)                                                           | 1.05  | 1.73  | 2.86 | 2.58E-04 |
| AFUA_4G08170 | Succinate-semialdehyde dehydrogenase Uga2, putative (EC 1.2.1.24)                               | 1.43  | 2.03  | 2.87 | 8.68E-06 |
| AFUA_3G00640 | Uncharacterized protein                                                                         | 1.84  | 0.70  | 2.90 | 2.45E-03 |
| AFUA_1G13790 | Histone H3                                                                                      | 2.16  | 2.07  | 2.90 | 5.44E-05 |
| AFUA_1G10780 | Aminomethyltransferase (EC 2.1.2.10) (Glycine cleavage system T protein)                        | 2.19  | 3.06  | 2.90 | 4.94E-05 |
| AFUA_5G06010 | Eukaryotic translation initiation factor 6 (eIF-6)                                              | 2.53  | 1.64  | 2.91 | 2.74E-04 |
| AFUA_5G04330 | Aminopeptidase (EC 3.4.11.-)                                                                    | 3.23  | 3.14  | 2.91 | 1.04E-09 |
| AFUA_7G01920 | DNA-directed RNA polymerase subunit beta (EC 2.7.7.6)                                           | 2.37  | 1.88  | 2.91 | 1.36E-04 |
| AFUA_5G12210 | G protein complex beta subunit SfaD                                                             | 2.36  | 1.81  | 2.92 | 7.28E-07 |
| AFUA_5G09450 | Isoflavone reductase family protein (EC 1.3.1.-)                                                | 1.60  | 1.94  | 2.92 | 3.41E-05 |
| AFUA_2G10090 | 40S ribosomal protein S15, putative                                                             | 1.67  | 0.87  | 2.93 | 1.64E-04 |
| AFUA_2G07350 | Gamma-glutamyl phosphate reductase (EC 1.2.1.41)                                                | 2.50  | 2.64  | 2.93 | 1.11E-04 |
| AFUA_4G11540 | Glycerol kinase, putative (EC 2.7.1.30)                                                         | 1.52  | 3.18  | 2.94 | 5.99E-05 |
| AFUA_6G10260 | Aldehyde reductase (AKR1), putative (EC 1.1.1.2)                                                | 3.26  | 3.25  | 2.95 | 3.81E-11 |
| AFUA_4G10920 | Uncharacterized protein                                                                         | 3.76  | 2.69  | 2.97 | 4.54E-05 |
| AFUA_1G14090 | Histidinol-phosphate aminotransferase (EC 2.6.1.9)                                              | 2.20  | 1.47  | 2.98 | 3.93E-06 |
| AFUA_3G07430 | Peptidyl-prolyl cis-trans isomerase (PPIase) (EC 5.2.1.8)                                       | 3.12  | 3.35  | 2.98 | 9.92E-09 |
| AFUA_1G09930 | Glycerol dehydrogenase Gcy1, putative (EC 1.1.1.-)                                              | 1.48  | 2.06  | 2.98 | 9.11E-09 |
| AFUA_1G11130 | 60S ribosomal protein L6                                                                        | 1.24  | 0.67  | 2.98 | 4.44E-04 |
| AFUA_7G04540 | Short chain dehydrogenase/reductase family (EC 1.1.1.69)                                        | 0.87  | 2.53  | 2.98 | 2.26E-07 |
| AFUA_1G05080 | 60S acidic ribosomal protein P0                                                                 | 1.33  | 0.33  | 2.99 | 1.59E-08 |
| AFUA_5G03860 | Alkaline phosphatase family protein (EC 3.1.-.-)                                                | 2.91  | 1.43  | 2.99 | 2.46E-03 |
| AFUA_7G02550 | Probable D-xylulose reductase A (EC 1.1.1.9) (Xylitol dehydrogenase A)                          | 2.11  | 3.08  | 3.00 | 2.95E-08 |
| AFUA_3G11480 | Mitochondrial methylglutaconyl-CoA hydratase (Auh), putative (EC 4.2.1.18)                      | 1.61  | 2.12  | 3.01 | 1.14E-06 |
| AFUA_4G10790 | Phosphoribosyl diphosphate synthase isoform 4                                                   | 2.51  | 1.61  | 3.04 | 1.23E-04 |
| AFUA_6G10980 | UV-damaged DNA binding protein, putative                                                        | 1.06  | 1.81  | 3.04 | 6.09E-05 |
| AFUA_4G14580 | O-methyltransferase tpcA (EC 2.1.1.-) (Trypacidin synthesis protein A)                          | -0.14 | 2.95  | 3.06 | 6.77E-07 |
| AFUA_5G06390 | Adenosine kinase, putative (EC 2.7.1.20)                                                        | 2.09  | 1.25  | 3.06 | 2.24E-06 |

|              |                                                                                                                                                                  |      |       |      |          |
|--------------|------------------------------------------------------------------------------------------------------------------------------------------------------------------|------|-------|------|----------|
| AFUA_2G02150 | 40S ribosomal protein S10a                                                                                                                                       | 2.48 | 0.92  | 3.06 | 1.80E-05 |
| AFUA_5G10540 | Glycogen branching enzyme GbeA, putative                                                                                                                         | 0.91 | 2.23  | 3.06 | 1.39E-07 |
| AFUA_4G07190 | Ornithine carbamoyltransferase (EC 2.1.3.3)                                                                                                                      | 2.47 | 3.65  | 3.07 | 6.27E-08 |
| AFUA_5G03330 | HypA-like protein, putative                                                                                                                                      | 3.28 | 2.78  | 3.08 | 2.01E-05 |
| AFUA_3G11350 | ATPase get3 (EC 3.6.-.-) (Arsenical pump-driving ATPase) (Arsenite-stimulated ATPase) (Golgi to ER traffic protein 3) (Guided entry of tail-anchored proteins 3) | 2.82 | 1.72  | 3.08 | 7.97E-03 |
| AFUA_3G08460 | 60S ribosomal protein L35Ae                                                                                                                                      | 0.98 | 0.77  | 3.10 | 9.03E-03 |
| AFUA_4G07845 | 60S ribosomal protein L38, putative                                                                                                                              | 1.15 | 1.37  | 3.10 | 7.41E-05 |
| AFUA_1G01970 | VeA-like protein                                                                                                                                                 | 1.53 | 2.00  | 3.12 | 1.12E-03 |
| AFUA_3G06970 | 40S ribosomal protein S9                                                                                                                                         | 2.75 | 0.77  | 3.13 | 2.34E-07 |
| AFUA_4G08760 | Phospho-2-dehydro-3-deoxyheptonate aldolase (EC 2.5.1.54)                                                                                                        | 2.94 | 2.29  | 3.14 | 1.80E-05 |
| AFUA_2G04320 | NADH-dependent flavin oxidoreductase, putative (EC 1.-.-.-)                                                                                                      | 2.88 | 3.06  | 3.15 | 6.48E-11 |
| AFUA_1G02140 | Glycogen debranching enzyme Gdb1, putative                                                                                                                       | 0.87 | 1.98  | 3.18 | 1.08E-03 |
| AFUA_4G11050 | NADH dehydrogenase [ubiquinone] flavoprotein 1, mitochondrial (EC 1.6.5.3) (EC 1.6.99.3)                                                                         | 1.96 | 1.85  | 3.19 | 1.70E-06 |
| AFUA_2G16370 | 60S ribosomal protein L32                                                                                                                                        | 1.11 | 0.28  | 3.19 | 5.74E-07 |
| AFUA_6G02370 | Actin-related protein 2/3 complex subunit 4                                                                                                                      | 3.24 | 2.67  | 3.19 | 5.22E-06 |
| AFUA_6G12930 | Aconitate hydratase, mitochondrial (Aconitase) (EC 4.2.1.3) (Citrate hydro-lyase) (Homocitrate dehydratase) (EC 4.2.1.-)                                         | 1.16 | 1.88  | 3.20 | 6.24E-07 |
| AFUA_1G06770 | 40S ribosomal protein S26                                                                                                                                        | 1.12 | 0.35  | 3.21 | 2.81E-03 |
| AFUA_1G05340 | 40S ribosomal protein S19                                                                                                                                        | 1.17 | 0.13  | 3.23 | 1.01E-04 |
| AFUA_1G13500 | Transketolase (EC 2.2.1.1)                                                                                                                                       | 2.21 | 3.24  | 3.23 | 5.10E-09 |
| AFUA_7G05015 | Glyoxalase family protein                                                                                                                                        | 3.23 | 3.11  | 3.23 | 5.16E-06 |
| AFUA_1G05990 | Ribosomal protein L16a                                                                                                                                           | 1.08 | 0.75  | 3.23 | 1.40E-07 |
| AFUA_5G08350 | 37S ribosomal protein S16                                                                                                                                        | 0.79 | 0.27  | 3.23 | 3.46E-08 |
| AFUA_3G00590 | Asp-hemolysin (Asp-HS)                                                                                                                                           | 0.00 | 3.01  | 3.24 | 7.48E-09 |
| AFUA_4G14520 | Monoxygenase tpcG (EC 1.-.-.-) (Trypacidin synthesis protein G)                                                                                                  | 1.55 | 1.86  | 3.24 | 4.15E-05 |
| AFUA_4G04300 | Alanine racemase family protein, putative                                                                                                                        | 0.78 | 2.85  | 3.24 | 3.63E-04 |
| AFUA_1G06340 | 60S ribosomal protein L27                                                                                                                                        | 0.97 | 0.79  | 3.25 | 8.93E-06 |
| AFUA_4G04460 | 60S ribosomal protein L13                                                                                                                                        | 1.14 | 0.48  | 3.26 | 1.59E-08 |
| AFUA_2G10440 | 40S ribosomal protein S11                                                                                                                                        | 2.00 | 0.84  | 3.26 | 6.32E-05 |
| AFUA_6G04560 | 37S ribosomal protein S9                                                                                                                                         | 0.95 | 2.24  | 3.28 | 4.88E-04 |
| AFUA_1G15730 | 40S ribosomal protein S22                                                                                                                                        | 1.16 | 0.42  | 3.28 | 6.61E-06 |
| AFUA_3G12300 | 60S ribosomal protein L22, putative                                                                                                                              | 0.20 | -0.02 | 3.29 | 1.33E-04 |
| AFUA_2G01220 | GTP cyclohydrolase II, putative (EC 3.5.4.25)                                                                                                                    | 1.06 | 2.20  | 3.30 | 5.88E-03 |
| AFUA_4G03880 | 60S ribosomal protein L7                                                                                                                                         | 0.03 | 0.25  | 3.30 | 1.24E-07 |
| AFUA_1G04660 | Ribosomal protein L15                                                                                                                                            | 1.90 | 0.74  | 3.30 | 1.58E-05 |
| AFUA_3G10730 | 40S ribosomal protein S7                                                                                                                                         | 1.32 | 0.33  | 3.31 | 8.79E-05 |
| AFUA_1G08930 | Probable cytosolic iron-sulfur protein assembly protein 1                                                                                                        | 2.13 | 2.22  | 3.31 | 2.02E-03 |
| AFUA_7G01460 | Ribosomal protein S5                                                                                                                                             | 2.02 | 0.64  | 3.32 | 4.53E-09 |
| AFUA_3G08470 | Glucose-6-phosphate 1-dehydrogenase (EC 1.1.1.49)                                                                                                                | 1.41 | 3.06  | 3.33 | 8.66E-07 |
| AFUA_3G06840 | 40S ribosomal protein S4                                                                                                                                         | 1.67 | 0.34  | 3.34 | 1.55E-08 |
| AFUA_1G03390 | 60S ribosomal protein L12                                                                                                                                        | 1.71 | 0.76  | 3.35 | 1.44E-04 |
| AFUA_2G09200 | 60S ribosomal protein L30, putative                                                                                                                              | 0.99 | 0.46  | 3.36 | 2.88E-07 |
| AFUA_1G15610 | Oxidoreductase, zinc-binding dehydrogenase family, putative (EC 1.3.1.-)                                                                                         | 3.27 | 3.06  | 3.36 | 9.47E-09 |
| AFUA_6G03730 | 2-methylcitrate dehydratase, putative (EC 4.2.1.79)                                                                                                              | 2.67 | 2.66  | 3.38 | 1.01E-06 |
| AFUA_1G14680 | DNA-directed RNA polymerase subunit (EC 2.7.7.6)                                                                                                                 | 2.25 | 2.02  | 3.38 | 4.43E-05 |
| AFUA_3G14270 | Aldo-keto reductase (AKR), putative (EC 1.1.1.-)                                                                                                                 | 3.85 | 3.37  | 3.39 | 1.19E-04 |
| AFUA_6G11620 | Formyltetrahydrofolate deformylase, putative (EC 3.5.1.10)                                                                                                       | 2.40 | 2.58  | 3.40 | 1.24E-06 |
| AFUA_3G11070 | Pyruvate decarboxylase (EC 4.1.1.1)                                                                                                                              | 1.95 | 3.42  | 3.43 | 9.50E-08 |
| AFUA_5G04230 | Citrate synthase                                                                                                                                                 | 1.29 | 2.25  | 3.43 | 2.08E-07 |
| AFUA_2G04130 | 40S ribosomal protein S11                                                                                                                                        | 1.54 | 0.29  | 3.44 | 1.24E-05 |
| AFUA_2G09790 | Glucose-6-phosphate isomerase (EC 5.3.1.9)                                                                                                                       | 3.53 | 3.67  | 3.45 | 1.95E-08 |
| AFUA_3G06880 | Sorting nexin-3                                                                                                                                                  | 2.81 | 2.58  | 3.46 | 3.16E-04 |
| AFUA_1G04530 | 60S ribosomal protein L20                                                                                                                                        | 1.54 | 0.72  | 3.47 | 2.47E-06 |
| AFUA_6G12990 | Cytosolic large ribosomal subunit protein L7A                                                                                                                    | 1.41 | 1.13  | 3.48 | 6.45E-08 |

|              |                                                                                                                                                        |      |       |      |          |
|--------------|--------------------------------------------------------------------------------------------------------------------------------------------------------|------|-------|------|----------|
| AFUA_7G02140 | 40S ribosomal protein S24                                                                                                                              | 1.90 | 1.10  | 3.49 | 1.13E-02 |
| AFUA_3G05360 | Histone H2A                                                                                                                                            | 1.50 | 2.69  | 3.49 | 3.10E-05 |
| AFUA_1G14710 | Beta-glucosidase, putative                                                                                                                             | 1.63 | 2.70  | 3.52 | 4.34E-05 |
| AFUA_6G12950 | Trehalose-6-phosphate synthase (EC 2.4.1.15) (UDP-glucose-glucosephosphate glucosyltransferase)                                                        | 3.01 | 1.98  | 3.52 | 7.43E-05 |
| AFUA_2G03040 | Ribosomal protein L34 protein, putative                                                                                                                | 0.10 | 0.60  | 3.53 | 1.60E-08 |
| AFUA_7G02470 | mRNA processing protein (Mss51), putative                                                                                                              | 1.86 | 2.70  | 3.53 | 1.59E-03 |
| AFUA_1G09750 | Aldehyde reductase (AKR1), putative (EC 1.1.1.2)                                                                                                       | 1.78 | 3.04  | 3.54 | 1.03E-08 |
| AFUA_2G10300 | 40S ribosomal protein S17, putative                                                                                                                    | 2.58 | 0.94  | 3.54 | 3.51E-05 |
| AFUA_5G03020 | 60S ribosomal protein L4, putative                                                                                                                     | 0.77 | 0.80  | 3.56 | 1.23E-08 |
| AFUA_6G05200 | 60S ribosomal protein L28                                                                                                                              | 0.62 | -0.07 | 3.56 | 1.05E-04 |
| AFUA_5G09680 | Succinate dehydrogenase cytochrome b560 subunit (EC 1.3.5.1)                                                                                           | 4.04 | 2.82  | 3.57 | 1.28E-05 |
| AFUA_2G09210 | 60S ribosomal protein L10                                                                                                                              | 1.05 | 0.67  | 3.59 | 2.78E-08 |
| AFUA_4G08330 | Aspartyl-tRNA synthetase, putative (EC 6.1.1.12)                                                                                                       | 2.81 | 2.80  | 3.60 | 1.77E-06 |
| AFUA_4G13510 | Isocitrate lyase (ICL) (Isocitrase) (Isocitratase) (EC 4.1.3.1) (Methylisocitrate lyase) (MICA) (EC 4.1.3.30) (Threo-D(S)-isocitrate glyoxylate-lyase) | 1.37 | 2.27  | 3.61 | 6.63E-08 |
| AFUA_3G06960 | 60S ribosomal protein L21, putative                                                                                                                    | 2.65 | 0.47  | 3.65 | 3.25E-05 |
| AFUA_3G13320 | 40S ribosomal protein S0                                                                                                                               | 2.09 | 0.99  | 3.67 | 3.50E-07 |
| AFUA_4G11730 | Glycerol dehydrogenase (GldB), putative (EC 1.1.1.72)                                                                                                  | 1.29 | 2.83  | 3.70 | 5.34E-07 |
| AFUA_5G06360 | 60S ribosomal protein L8, putative                                                                                                                     | 0.78 | 0.65  | 3.74 | 6.35E-08 |
| AFUA_2G16820 | Curved DNA-binding protein (42 kDa protein) (EC 3.4.11.18)                                                                                             | 0.20 | 0.97  | 3.74 | 3.30E-08 |
| AFUA_3G00280 | Metallo-beta-lactamase domain protein, putative                                                                                                        | 2.26 | 3.78  | 3.75 | 5.18E-04 |
| AFUA_1G10150 | Uncharacterized protein                                                                                                                                | 3.69 | 2.92  | 3.83 | 2.18E-05 |
| AFUA_5G05630 | 60S ribosomal protein L23                                                                                                                              | 0.55 | 0.44  | 3.83 | 1.16E-04 |
| AFUA_2G10500 | 40S ribosomal protein Rps16, putative                                                                                                                  | 2.04 | 1.54  | 3.83 | 3.79E-05 |
| AFUA_3G06070 | Histone H1                                                                                                                                             | 2.55 | 2.66  | 3.86 | 1.66E-05 |
| AFUA_3G02370 | Short-chain dehydrogenase/reductase, putative (EC 1.-.-.-)                                                                                             | 2.77 | 2.92  | 3.87 | 7.65E-07 |
| AFUA_1G09440 | 40S ribosomal protein S23                                                                                                                              | 1.93 | 0.27  | 4.03 | 1.00E-05 |
| AFUA_4G07435 | 60S ribosomal protein L36                                                                                                                              | 1.10 | 0.82  | 4.07 | 2.59E-04 |
| AFUA_2G08130 | 60S ribosomal protein L44                                                                                                                              | 1.76 | 1.02  | 4.10 | 2.38E-06 |
| AFUA_4G07730 | 60S ribosomal protein L11                                                                                                                              | 2.60 | 1.32  | 4.11 | 1.78E-06 |
| AFUA_3G05600 | 60S ribosomal protein L27a, putative                                                                                                                   | 0.74 | 0.90  | 4.14 | 8.86E-09 |
| AFUA_7G05290 | 40S ribosomal protein S13                                                                                                                              | 2.13 | 1.40  | 4.21 | 4.71E-06 |
| AFUA_6G03830 | Ribosomal protein L14                                                                                                                                  | 2.30 | 1.58  | 4.26 | 6.50E-08 |
| AFUA_1G14410 | 60S ribosomal protein L17                                                                                                                              | 1.79 | 1.58  | 4.32 | 4.06E-08 |
| AFUA_6G13250 | 60S ribosomal protein L31e                                                                                                                             | 1.73 | 2.03  | 4.41 | 2.79E-05 |
| AFUA_6G12660 | 40S ribosomal protein S10b                                                                                                                             | 1.66 | 0.41  | 4.49 | 1.26E-03 |
| AFUA_6G12870 | Iron-sulfur clusters transporter atm1, mitochondrial                                                                                                   | 4.78 | 2.84  | 4.54 | 4.29E-04 |
| AFUA_2G16880 | 60S ribosomal protein L37a                                                                                                                             | 0.96 | 1.79  | 4.84 | 7.06E-07 |
| AFUA_2G03380 | Alkaline serine protease                                                                                                                               | 2.14 | 1.37  | 4.85 | 1.02E-04 |
| AFUA_3G06760 | 60S ribosomal protein L37                                                                                                                              | 2.46 | 2.44  | 5.25 | 9.40E-06 |
| AFUA_6G12720 | 40S ribosomal protein S29, putative                                                                                                                    | 2.17 | 0.92  | 5.44 | 5.97E-06 |
| AFUA_6G02450 | 40S ribosomal protein S30                                                                                                                              | 4.38 | 2.31  | 6.33 | 5.94E-10 |

\* Log2 fold change of CEA10, ISSFT-021, and IF1SW-F4 compared to Af293 (P < 0.05)
