# Supplementary material
Source: PubMed Central journal article supplement (PMC9116463)
Supplement: NIHMS1518386-supplement-2.pdf [file NIHMS1518386-supplement-2.pdf]

**Supplementary Table S-2.** Up- and down-regulated proteins in space strains when compared to Af293 and CEA10.

| Gene         | Protein names                                                                                | Relative protein abundance* |           |          | P-value  |
|--------------|----------------------------------------------------------------------------------------------|-----------------------------|-----------|----------|----------|
|              |                                                                                              | CEA10                       | ISSFT-021 | IFISW-F4 |          |
| AFUA_3G00280 | Metallo-beta-lactamase domain protein, putative                                              | 2.26                        | 3.78      | 3.75     | 5.18E-04 |
| AFUA_3G11070 | Pyruvate decarboxylase (EC 4.1.1.1)                                                          | 1.95                        | 3.42      | 3.43     | 9.50E-08 |
| AFUA_1G13500 | Transketolase (EC 2.2.1.1)                                                                   | 2.21                        | 3.24      | 3.23     | 5.10E-09 |
| AFUA_4G11540 | Glycerol kinase, putative (EC 2.7.1.30)                                                      | 1.52                        | 3.18      | 2.94     | 5.99E-05 |
| AFUA_3G08470 | Glucose-6-phosphate 1-dehydrogenase (EC 1.1.1.49)                                            | 1.41                        | 3.06      | 3.33     | 8.66E-07 |
| AFUA_1G09750 | Aldehyde reductase (AKR1), putative (EC 1.1.1.2)                                             | 1.78                        | 3.04      | 3.54     | 1.03E-08 |
| AFUA_4G14530 | Glutathione S-transferase-like protein tpcF (EC 2.5.1.-) (Trypacidin synthesis protein E)    | 0.83                        | 3.02      | 2.46     | 2.76E-06 |
| AFUA_3G00590 | Asp-hemolysin (Asp-HS)                                                                       | 0.00                        | 3.01      | 3.24     | 7.48E-09 |
| AFUA_4G14580 | O-methyltransferase tpcA (EC 2.1.1.-) (Trypacidin synthesis protein A)                       | -0.14                       | 2.95      | 3.06     | 6.77E-07 |
| AFUA_4G04300 | Alanine racemase family protein, putative                                                    | 0.78                        | 2.85      | 3.24     | 3.63E-04 |
| AFUA_4G11730 | Glycerol dehydrogenase (GldB), putative (EC 1.1.1.72)                                        | 1.29                        | 2.83      | 3.70     | 5.34E-07 |
| AFUA_1G14710 | Beta-glucosidase, putative                                                                   | 1.63                        | 2.70      | 3.52     | 4.34E-05 |
| AFUA_3G05360 | Histone H2A                                                                                  | 1.50                        | 2.69      | 3.49     | 3.10E-05 |
| AFUA_3G10310 | Acetolactate synthase (EC 2.2.1.6)                                                           | 1.11                        | 2.68      | 2.31     | 4.10E-07 |
| AFUA_4G14470 | Probable decarboxylase tpcK (EC 1.-.-) (Trypacidin synthesis protein K)                      | 0.27                        | 2.58      | 2.17     | 3.04E-03 |
| AFUA_5G11430 | Quinone oxidoreductase, putative (EC 1.6.5.5)                                                | 0.95                        | 2.55      | 2.51     | 1.45E-09 |
| AFUA_7G04540 | Short chain dehydrogenase/reductase family (EC 1.1.1.69)                                     | 0.87                        | 2.53      | 2.98     | 2.26E-07 |
| AFUA_2G17580 | Scytalone dehydratase arp1 (EC 4.2.1.94) (Conidial pigment biosynthesis oxidase arp1)        | 0.58                        | 2.49      | 2.69     | 2.24E-07 |
| AFUA_7G02070 | AIF-like mitochondrial oxidoreductase (Nfr1), putative                                       | 0.65                        | 2.37      | 2.52     | 2.26E-08 |
| AFUA_8G01210 | Enoyl-CoA hydratase/isomerase family protein (EC 4.2.1.17)                                   | -0.38                       | 2.33      | 2.05     | 5.72E-03 |
| AFUA_6G06750 | 14-3-3 family protein                                                                        | 0.77                        | 2.32      | 2.84     | 2.93E-06 |
| AFUA_6G04560 | 37S ribosomal protein S9                                                                     | 0.95                        | 2.24      | 3.28     | 4.88E-04 |
| AFUA_5G10540 | Glycogen branching enzyme GbeA, putative                                                     | 0.91                        | 2.23      | 3.06     | 1.39E-07 |
| AFUA_2G03290 | 14-3-3 family protein ArtA, putative                                                         | 0.67                        | 2.21      | 2.82     | 1.90E-07 |
| AFUA_3G10090 | Dihydroneopterin aldolase domain protein (EC 4.1.2.25)                                       | 0.71                        | 2.20      | 2.58     | 2.09E-05 |
| AFUA_2G01220 | GTP cyclohydrolase II, putative (EC 3.5.4.25)                                                | 1.06                        | 2.20      | 3.30     | 5.88E-03 |
| AFUA_3G13620 | Cupin domain protein                                                                         | -0.46                       | 2.20      | 1.33     | 1.15E-03 |
| AFUA_4G06380 | Sterol carrier protein, putative                                                             | 0.71                        | 2.15      | 2.45     | 7.99E-07 |
| AFUA_2G07720 | Cytochrome b5, putative                                                                      | 0.33                        | 2.14      | 2.11     | 2.06E-02 |
| AFUA_1G02820 | NADH-quinone oxidoreductase Pst2, putative                                                   | -0.37                       | 2.10      | 2.55     | 9.33E-06 |
| AFUA_6G03540 | Malate synthase (EC 2.3.3.9)                                                                 | 0.38                        | 2.10      | 2.16     | 1.22E-07 |
| AFUA_1G09480 | Vacuolar protein sorting-associated protein 29                                               | 0.98                        | 2.02      | 2.31     | 3.96E-02 |
| AFUA_1G02140 | Glycogen debranching enzyme Gdb1, putative                                                   | 0.87                        | 1.98      | 3.18     | 1.08E-05 |
| AFUA_3G12560 | Allantoicase Alc, putative (EC 3.5.3.4)                                                      | -0.32                       | 1.93      | 2.50     | 3.74E-03 |
| AFUA_6G05090 | RNA polymerase II Elongator subunit, putative                                                | -0.19                       | 1.92      | 2.79     | 3.47E-03 |
| AFUA_6G10660 | ATP citrate lyase subunit (Acl), putative (EC 6.2.1.5)                                       | 0.19                        | 1.91      | 2.65     | 1.23E-04 |
| AFUA_2G14030 | Arginyl-tRNA synthetase (EC 6.1.1.19)                                                        | 0.35                        | 1.91      | 2.08     | 2.78E-07 |
| AFUA_3G00370 | Phosphoketolase, putative (EC 4.1.2.-)                                                       | 0.51                        | 1.88      | 2.84     | 3.50E-05 |
| AFUA_4G04680 | FGGY-family carbohydrate kinase, putative                                                    | 0.81                        | 1.82      | 2.61     | 1.73E-05 |
| AFUA_7G01880 | Nicotinate phosphoribosyltransferase (EC 6.3.4.21)                                           | -0.48                       | 1.81      | 1.87     | 8.56E-04 |
| AFUA_3G11640 | Homoserine dehydrogenase (HDH) (EC 1.1.1.3)                                                  | -0.21                       | 1.76      | 2.09     | 2.66E-06 |
| AFUA_3G11430 | Arginase (EC 3.5.3.1)                                                                        | 0.44                        | 1.75      | 2.07     | 7.83E-03 |
| AFUA_2G01100 | Pirin domain protein, putative                                                               | 0.33                        | 1.73      | 2.73     | 9.67E-04 |
| AFUA_4G07690 | Phosphoribosylaminoimidazolecarboxamide formyltransferase/IMP cyclohydrolase                 | 0.20                        | 1.65      | 2.06     | 7.82E-08 |
| AFUA_1G01750 | Peptidyl-prolyl cis-trans isomerase, putative (EC 5.2.1.8)                                   | 0.38                        | 1.61      | 1.81     | 1.91E-02 |
| AFUA_3G06210 | Phosphoribosyl-aminoimidazole-succinocarboxamide synthase (EC 6.3.2.6)                       | -0.11                       | 1.53      | 2.33     | 2.96E-06 |
| AFUA_5G03350 | Glutamine-dependent NAD(+) synthetase (EC 6.3.5.1) (NAD(+) synthase [glutamine-hydrolyzing]) | 0.47                        | 1.51      | 1.84     | 5.06E-03 |

|              |                                                                                                                                   |       |       |       |          |
|--------------|-----------------------------------------------------------------------------------------------------------------------------------|-------|-------|-------|----------|
| AFUA_4G08880 | Glucose-6-phosphate 1-epimerase (EC 5.1.3.15)                                                                                     | -0.32 | 1.46  | 2.61  | 7.00E-05 |
| AFUA_5G06130 | Succinate--CoA ligase [ADP-forming] subunit alpha, mitochondrial (EC 6.2.1.5) (Succinyl-CoA synthetase subunit alpha) (SCS-alpha) | -0.10 | 1.42  | 2.15  | 4.63E-07 |
| AFUA_7G01830 | UTP-glucose-1-phosphate uridylyltransferase Ugp1, putative                                                                        | 0.00  | 1.35  | 2.11  | 4.43E-05 |
| AFUA_2G15980 | 3' exoribonuclease family protein                                                                                                 | 0.02  | 1.24  | 2.20  | 4.73E-03 |
| AFUA_4G14070 | Glycosyl transferase, putative (EC 2.-.-)                                                                                         | -0.24 | 1.23  | 1.60  | 4.77E-04 |
| AFUA_1G05850 | Erythromycin esterase, putative                                                                                                   | -0.16 | 1.22  | 2.48  | 6.61E-03 |
| AFUA_2G05910 | Phosphotransferase (EC 2.7.1.-)                                                                                                   | -0.01 | 1.20  | 2.12  | 8.68E-07 |
| AFUA_2G11290 | Orotate phosphoribosyltransferase (EC 2.4.2.10)                                                                                   | -0.51 | 1.15  | 2.21  | 5.62E-08 |
| AFUA_5G06710 | DUF89 domain protein                                                                                                              | -0.36 | 1.07  | 1.81  | 1.10E-04 |
| AFUA_4G13120 | Glutamine synthetase (EC 6.3.1.2)                                                                                                 | -0.37 | 1.01  | 2.23  | 6.13E-05 |
| AFUA_2G01330 | Exosome complex subunit Rrp46, putative (EC 3.1.13.-)                                                                             | -0.13 | 1.01  | 2.12  | 2.83E-02 |
| AFUA_2G00680 | Glycosyl hydrolase, putative                                                                                                      | -0.14 | 1.01  | 1.63  | 1.32E-02 |
| AFUA_5G05500 | D-3-phosphoglycerate dehydrogenase (EC 1.1.1.95)                                                                                  | -0.44 | 0.99  | 1.51  | 1.70E-04 |
| AFUA_4G06960 | UBX domain protein, putative                                                                                                      | 0.16  | -0.99 | -2.03 | 8.96E-03 |
| AFUA_1G06580 | High expression lethality protein Hel10, putative                                                                                 | 1.24  | -1.04 | -1.37 | 4.99E-06 |
| AFUA_6G05030 | Polysaccharide deacetylase family protein                                                                                         | -0.09 | -1.21 | -1.23 | 1.53E-03 |
| AFUA_1G03140 | Glycosyl hydrolase, putative (EC 3.2.1.-)                                                                                         | -0.31 | -1.31 | -1.44 | 1.39E-06 |
| AFUA_7G05650 | Glutamine-serine rich protein MS8, putative                                                                                       | -0.10 | -1.39 | -1.40 | 2.22E-02 |
| AFUA_6G14490 | Probable beta-glucosidase H (EC 3.2.1.21) (Beta-D-glucoside glucohydrolase H) (Cellobiase H) (Gentiobiase H)                      | -0.21 | -1.41 | -1.33 | 4.68E-05 |
| AFUA_2G15510 | DUF866 domain protein                                                                                                             | 0.98  | -1.44 | -1.51 | 7.12E-07 |
| AFUA_1G06910 | Probable arabinogalactan endo-beta-1,4-galactanase A (EC 3.2.1.89) (Endo-1,4-beta-galactanase A) (Galactanase A)                  | -0.43 | -1.53 | -2.04 | 9.05E-06 |
| AFUA_5G09600 | 2-nitropropane dioxygenase family oxidoreductase, putative (EC 1.3.1.9)                                                           | 0.41  | -1.54 | -1.66 | 1.28E-03 |
| AFUA_2G00820 | Extracellular GDSL-like lipase/acylhydrolase, putative                                                                            | -0.17 | -1.68 | -1.43 | 4.80E-05 |
| AFUA_7G05450 | Secreted beta-glucosidase sun1 (EC 3.2.1.-)                                                                                       | -0.61 | -1.87 | -2.15 | 4.13E-02 |
| AFUA_2G17470 | L-PSP endoribonuclease family protein, putative                                                                                   | 0.01  | -2.24 | -2.03 | 2.01E-03 |
| AFUA_4G03322 | WW domain protein                                                                                                                 | -0.34 | -2.27 | -2.52 | 5.11E-03 |
| AFUA_2G13310 | RING finger domain protein, putative                                                                                              | 0.82  | -2.49 | -1.61 | 4.25E-03 |
| AFUA_3G10340 | Rho GTPase Rho 2, putative                                                                                                        | -0.96 | -2.51 | -2.14 | 2.12E-03 |
| AFUA_3G07870 | Extracellular serine-rich protein, putative                                                                                       | -1.73 | -2.89 | -3.23 | 1.27E-06 |
| AFUA_2G05540 | Pre-mRNA-splicing factor cef1                                                                                                     | -2.16 | -3.57 | -3.66 | 5.22E-03 |
| AFUA_2G14490 | Endoglucanase, putative (EC 3.2.1.-)                                                                                              | -2.17 | -3.83 | -3.33 | 1.17E-04 |
| AFUA_2G03010 | Cytochrome c subunit Vb, putative                                                                                                 | -2.09 | -3.83 | -3.13 | 8.44E-07 |
| AFUA_3G13850 | LRP16 family protein                                                                                                              | -2.27 | -4.37 | -4.88 | 1.16E-03 |
| AFUA_6G03210 | Conidiation-specific protein (Con-10), putative                                                                                   | -2.13 | -4.73 | -3.82 | 3.46E-04 |
| AFUA_3G10410 | Conserved serine-rich protein                                                                                                     | -2.82 | -4.81 | -3.94 | 3.68E-05 |
| AFUA_7G01340 | RPEL repeat protein                                                                                                               | -3.36 | -5.15 | -5.55 | 4.07E-10 |
| AFUA_4G08960 | GPI anchored cell wall protein, putative                                                                                          | -3.69 | -5.18 | -5.37 | 8.40E-05 |
| AFUA_1G17370 | Heat shock protein Awh11, putative                                                                                                | -2.95 | -5.23 | -4.26 | 4.25E-07 |
| AFUA_3G05570 | Spindle poison sensitivity protein Scp3, putative                                                                                 | -2.94 | -5.28 | -4.83 | 4.20E-04 |
| AFUA_7G04930 | Alkaline serine protease (PR1)/allergen F18-like (EC 3.4.21.-)                                                                    | -3.63 | -5.32 | -5.53 | 1.14E-06 |
| AFUA_4G00860 | Cell surface protein, putative                                                                                                    | -3.54 | -5.64 | -4.62 | 1.37E-07 |
| AFUA_3G05430 | ATP-dependent RNA helicase dhh1 (EC 3.6.4.13)                                                                                     | -2.86 | -5.81 | -4.16 | 7.98E-04 |
| AFUA_6G12450 | Chaperone/heat shock protein Hsp12, putative                                                                                      | -4.05 | -5.81 | -5.12 | 5.46E-05 |
| AFUA_4G09600 | GPI anchored protein, putative                                                                                                    | -3.43 | -6.26 | -5.82 | 1.33E-07 |
| AFUA_5G14210 | Glucose repressible protein Grg1, putative                                                                                        | -3.21 | -7.14 | -4.80 | 1.87E-07 |

\* Log2 fold change of CEA10, ISSFT-021, and IF1SW-F4 compared to Af293 (P < 0.05)
